# Supplementary material for: Silver-mediated radical coupling reaction of isocyanides and alcohols/phenols in the presence of water: unprecedented hydration and radical coupling reaction sequence
Source: Royal Society of Chemistry journal article supplement (doi:10.1039/c7ob00019g), 2017-01-01

*Supporting Information for*

**Silver-Mediated Radical Coupling Reaction of Isocyanides and  
Alcohols/Phenols in the Presence of Water: Unprecedented  
Hydration and Radical Coupling Reaction Sequence**

Lin Zhang,<sup>a</sup> Pin Xiao,<sup>a</sup> Xiaoxue Guan,<sup>a</sup> Zhouliang Huang,<sup>a</sup> Jingping Zhang\*<sup>a</sup> and Xihe Bi\*<sup>a,b</sup>

<sup>a</sup> Jilin Province Key Laboratory of Organic Functional Molecular Design & Synthesis, Northeast Normal University, Changchun 130024, China. <sup>b</sup> State Key Laboratory of Elemento-Organic Chemistry, Nankai University, Tianjin 300071, China.

E-mail: [bixh507@nenu.edu.cn](mailto:bixh507@nenu.edu.cn)

**Contents**

|                                                                |                |
|----------------------------------------------------------------|----------------|
| <b>I. General information.....</b>                             | <b>S2</b>      |
| <b>II. Crystallography.....</b>                                | <b>S2-S5</b>   |
| <b>III. Optimization of the Reaction Conditions.....</b>       | <b>S6</b>      |
| <b>IV. Synthesis and analytical data of the compounds.....</b> | <b>S6-S15</b>  |
| <b>V. DFT study of the mechanism.....</b>                      | <b>S15-S16</b> |
| <b>VI. NMR spectracopies.....</b>                              | <b>S17-S54</b> |

## I. General information

All reagents were purchased from commercial sources and used without treatment, unless otherwise indicated. The products were purified by column chromatography over silica gel.  $^1\text{H}$ -NMR and  $^{13}\text{C}$ -NMR spectra were recorded at 25 °C on a Varian 500 MHz and 125 MHz or on a Varian 400 MHz and 100 MHz respectively, and TMS was used as internal standard. Mass spectra were recorded on Bruker AutoflexIII Smartbeam MS-spectrometer. High resolution mass spectra (HRMS) were recorded on Bruck microTof by using ESI method.

## II. Crystallography

Single-crystal X-ray diffraction data for the reported complex was recorded at a temperature of 273(2) K and 293(2) K on an Oxford Diffraction Gemini R Ultra diffractometer, using a  $\omega$  scan technique with Mo-K $\alpha$  radiation ( $\lambda = 0.71073 \text{ \AA}$ ). The structure was solved by Direct Method of SHELXS-97 and refined by full-matrix least-squares techniques using the SHELXL-97 program.<sup>1</sup> Non-hydrogen atoms were refined with anisotropic temperature parameters, and hydrogen atoms of the ligands were refined as rigid groups. Basic information pertaining to crystal parameters and structure refinement is summarized in Table S1-S3.

Ref: (a) G. M. Sheldrick, SHELXS-97, Program for Solution of Crystal Structures, University of Gottingen, Germany, 1997; (b) G. M. Sheldrick, SHELXL-97, Program for Refinement of Crystal Structures, University of Gottingen, Germany, 1997.

**Table S1** Crystal data of **3a** and structure refinement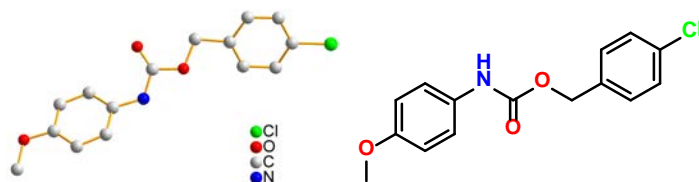

|                                   |                                                                                                             |
|-----------------------------------|-------------------------------------------------------------------------------------------------------------|
| Empirical formula                 | C <sub>15</sub> H <sub>14</sub> ClNO <sub>3</sub>                                                           |
| Temperature                       | 293(2)K                                                                                                     |
| Wavelength                        | 0.71073 Å                                                                                                   |
| Unit cell dimensions              | a = 5.407 Å    alpha = 96.51 deg.<br>b = 7.782 Å    beta = 95.82 deg.<br>c = 16.311 Å    gamma = 90.74 deg. |
| Volume                            | 678.2 Å <sup>3</sup>                                                                                        |
| Z                                 | 2                                                                                                           |
| Calculated density                | 0.714 Mg/m <sup>3</sup>                                                                                     |
| Absorption coefficient            | 0.144 mm <sup>-1</sup>                                                                                      |
| F(000)                            | 152                                                                                                         |
| Crystal size                      | 0.1 x 0.1 x 0.1 mm                                                                                          |
| Theta range for data collection   | 2.53 to 28.25 deg.                                                                                          |
| Reflections collected / unique    | 4161 / 3028 [R(int) = 0.0183]                                                                               |
| Data / restraints / parameters    | 3028 / 0 / 81                                                                                               |
| Goodness-of-fit on F <sup>2</sup> | 1.708                                                                                                       |
| Final R indices [I>2sigma(I)]     | R1 = 0.1178, wR2 = 0.3655                                                                                   |
| R indices (all data)              | R1 = 0.1290, wR2 = 0.3964                                                                                   |

**Table S2** Crystal data of **5b** and structure refinement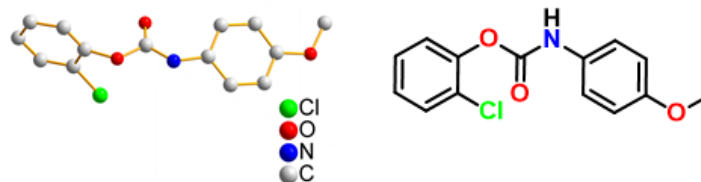

|                                   |                                                                                                                                        |
|-----------------------------------|----------------------------------------------------------------------------------------------------------------------------------------|
| Empirical formula                 | C <sub>14</sub> H <sub>12</sub> ClNO <sub>3</sub>                                                                                      |
| Temperature                       | 293(2)K                                                                                                                                |
| Wavelength                        | 0.71073 Å                                                                                                                              |
| Unit cell dimensions              | a = 9.5682(10) Å    alpha = 88.829(2) deg.<br>b = 9.6574(10) Å    beta = 86.829(2) deg.<br>c = 14.7650(15) Å    gamma = 76.122(2) deg. |
| Volume                            | 1322.5(2) Å <sup>3</sup>                                                                                                               |
| Z                                 | 17                                                                                                                                     |
| Calculated density                | 1.675 Mg/m <sup>3</sup>                                                                                                                |
| Absorption coefficient            | 0.954 mm <sup>-1</sup>                                                                                                                 |
| F(000)                            | 663                                                                                                                                    |
| Crystal size                      | 0.1 x 0.1 x 0.1 mm                                                                                                                     |
| Theta range for data collection   | 2.17 to 28.29 deg.                                                                                                                     |
| Reflections collected / unique    | 7977 / 5892 [R(int) = 0.0205]                                                                                                          |
| Data / restraints / parameters    | 5892 / 0 / 153                                                                                                                         |
| Goodness-of-fit on F <sup>2</sup> | 1.707                                                                                                                                  |
| Final R indices [I>2sigma(I)]     | R1 = 0.1430, wR2 = 0.3954                                                                                                              |
| R indices (all data)              | R1 = 0.1772, wR2 = 0.4520                                                                                                              |

**Table S3** Crystal data of **10a** and structure refinement

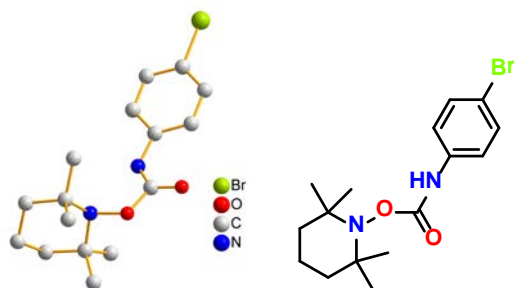

|                                   |                                                                                                                       |
|-----------------------------------|-----------------------------------------------------------------------------------------------------------------------|
| Empirical formula                 | C <sub>16</sub> H <sub>23</sub> BrN <sub>2</sub> O <sub>2</sub>                                                       |
| Temperature                       | 273(2) K                                                                                                              |
| Wavelength                        | 0.71073 Å                                                                                                             |
| Unit cell dimensions              | a = 7.6713(19) Å    alpha = 90 deg.<br>b = 20.094(5) Å    beta = 94.855(4) deg.<br>c = 10.598(3) Å    gamma = 90 deg. |
| Volume                            | 1627.8(7) Å <sup>3</sup>                                                                                              |
| Z                                 | 20                                                                                                                    |
| Calculated density                | 2.508 Mg/m <sup>3</sup>                                                                                               |
| Absorption coefficient            | 12.366 mm <sup>-1</sup>                                                                                               |
| F(000)                            | 1140                                                                                                                  |
| Crystal size                      | 0.1 x 0.1 x 0.1 mm                                                                                                    |
| Theta range for data collection   | 2.03 to 28.31 deg.                                                                                                    |
| Reflections collected / unique    | 11397 / 3837 [R(int) = 0.0536]                                                                                        |
| Data / restraints / parameters    | 3837 / 0 / 190                                                                                                        |
| Goodness-of-fit on F <sup>2</sup> | 1.065                                                                                                                 |
| Final R indices [I > 2sigma(I)]   | R1 = 0.0641, wR2 = 0.1776                                                                                             |
| R indices (all data)              | R1 = 0.0967, wR2 = 0.2014                                                                                             |

### III. Optimization of the Reaction Conditions<sup>a</sup>

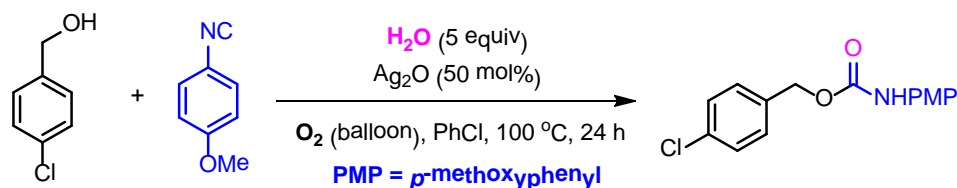

| Entry           | Variation from standard conditions                                      | <b>3a</b> (%) <sup>b</sup> |
|-----------------|-------------------------------------------------------------------------|----------------------------|
| 1               | Co(acac) <sub>2</sub> (50 mol%), instead of Ag <sub>2</sub> O           | 23                         |
| 2               | Pd(OAc) <sub>2</sub> (10 mol%), instead of Ag <sub>2</sub> O            | 26                         |
| 3               | CuCl (50 mol%), instead of Ag <sub>2</sub> O                            | 0                          |
| 4               | Mn(OAc) <sub>3</sub> (50 mol%), instead of Ag <sub>2</sub> O            | trace                      |
| 5               | AgOTf (50 mol%), instead of Ag <sub>2</sub> O                           | trace                      |
| 6               | AgOAc (50 mol%), instead of Ag <sub>2</sub> O                           | trace                      |
| 7               | Ag <sub>2</sub> CO <sub>3</sub> (50 mol%), instead of Ag <sub>2</sub> O | 52                         |
| 8               | Without Ag <sub>2</sub> O                                               | 0                          |
| 9               | Without O <sub>2</sub> , nitrogen protection                            | 19                         |
| 10              | Without H <sub>2</sub> O                                                | 26                         |
| 11              | CH <sub>3</sub> CN, instead of PhCl                                     | 32                         |
| 12              | DCE, instead of PhCl                                                    | 48                         |
| 13              | DCE, instead of PhCl                                                    | 39                         |
| 14              | 1,4-Dioxane, instead of PhCl                                            | trace                      |
| 15 <sup>c</sup> | DMSO, instead of PhCl                                                   | n.d.                       |

<sup>a</sup> Standard reaction conditions: **1a** (0.3 mmol), **2a** (0.45 mmol), Ag<sub>2</sub>O (0.15 mmol), H<sub>2</sub>O (1.5 mmol), in PhCl (1.5 mL) at 100 °C under oxygen atmosphere for 24 h. <sup>b</sup> Yield of isolated product.

<sup>c</sup> No **3a** was detected by <sup>1</sup>H-NMR.

### IV. Synthesis and analytical data of the compounds

Typical synthetic procedure for compounds **3**, **5** and **6** (with **3a** as an example):

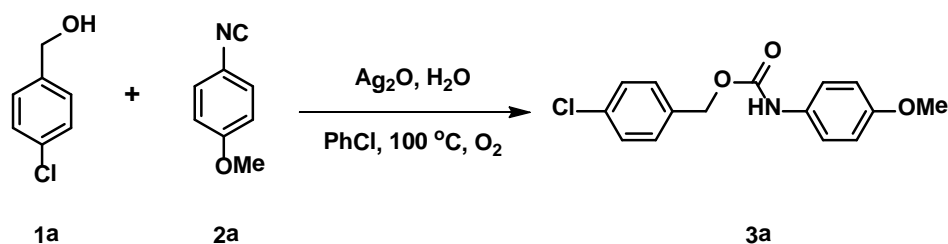

A mixture of **1a** (71 mg, 0.5 mmol), 4-methoxyphenyl isocyanide **2a** (100 mg, 0.75 mmol), Ag<sub>2</sub>O (58 mg, 0.25 mmol) and H<sub>2</sub>O (45 μL, 2.5 mmol) in chlorobenzene (2.0 mL) stirred at 100 °C under oxygen atmosphere. The mixture was then stirred until substrate **1a** consumed as indicated by TLC. The resulting mixture was concentrated and the residue was taken up in DCM. The organic layer was washed with brine, dried over MgSO<sub>4</sub> and concentrated. The resulted reaction product was purified by column chromatography to afford white solid **3a** in 77% yield.

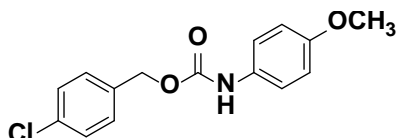

**(3a)** White solid, m.p. 130-131 °C; <sup>1</sup>H-NMR (500 MHz, CDCl<sub>3</sub>) δ 7.33 (m, 4H), 7.28 (m, 2H), 6.84 (d, *J* = 9.0 Hz, 2H), 6.58 (s, 1H), 5.14 (s, 2H), 3.78 (s, 3H); <sup>13</sup>C-NMR (125 MHz, CDCl<sub>3</sub>) δ 156.0, 153.5, 134.6, 134.1, 130.6, 129.6, 128.7, 120.7, 114.2, 66.0, 55.5; HRMS (ESI) *m/z* calculated for C<sub>15</sub>H<sub>15</sub>ClNO<sub>3</sub> [M+H]<sup>+</sup> : 292.0735, found 292.0739.

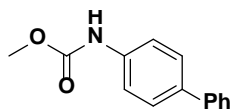

**(3b)** Yellow solid, m.p. 130-131 °C; <sup>1</sup>H-NMR (500 MHz, CDCl<sub>3</sub>) δ 7.57-7.54 (m, 4H), 7.46-7.41 (m, 4H), 7.32 (t, *J* = 7.5 Hz, 1H), 6.73 (s, 1H), 3.80 (s, 3H); <sup>13</sup>C-NMR (125 MHz, CDCl<sub>3</sub>) δ 154.0, 140.4, 137.1, 136.3, 128.7, 127.7, 127.0, 126.8, 118.9, 52.4; HRMS (ESI) *m/z* calculated for C<sub>14</sub>H<sub>14</sub>NO<sub>2</sub> [M+H]<sup>+</sup> : 228.1019, found 228.1025.

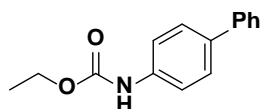

**(3c)** Yellow solid, m.p. 123-124 °C; <sup>1</sup>H-NMR (500 MHz, CDCl<sub>3</sub>) δ 7.46-7.42 (m, 4H), 7.37-7.36 (m, 2H), 7.31 (t, *J* = 7.5 Hz, 2H), 7.21 (t, *J* = 7.5 Hz, 1H), 6.79 (s, 1H), 4.15 (q, *J* = 7.0 Hz, 2H), 1.21 (t, *J* = 7.0 Hz, 3H); <sup>13</sup>C-NMR (125 MHz, CDCl<sub>3</sub>) δ 153.6, 140.4, 137.2, 136.1, 128.7, 127.5, 126.9, 126.7, 118.9, 61.2, 14.5; HRMS (ESI) *m/z* calculated for C<sub>15</sub>H<sub>16</sub>NO<sub>2</sub> [M+H]<sup>+</sup> : 242.1176, found 242.1175.

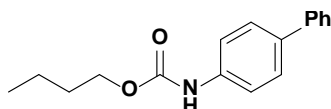

**(3d)** White solid, m.p. 111-112 °C; <sup>1</sup>H-NMR (500 MHz, CDCl<sub>3</sub>) δ 7.56-7.53 (m, 4H), 7.46-7.40 (m, 4H), 7.33-7.24 (m, 1H), 6.74 (s, 1H), 4.18 (t, *J* = 7.0 Hz, 2H), 1.69-1.63 (m, 2H), 1.46-1.38 (m, 2H), 0.96 (t, *J* = 7.0 Hz, 3H); <sup>13</sup>C-NMR (125 MHz, CDCl<sub>3</sub>) δ 153.7, 140.5, 137.2, 136.1, 128.7, 127.6, 126.9, 126.7, 118.8, 65.1, 30.9, 19.0, 13.7; HRMS (ESI) *m/z* calculated for C<sub>17</sub>H<sub>20</sub>NO<sub>2</sub> [M+Na]<sup>+</sup> : 270.1489, found 270.1490.

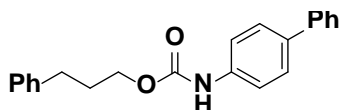

(3e) Yellow solid, m.p. 119-120 °C;  $^1\text{H-NMR}$  (500 MHz,  $\text{CDCl}_3$ )  $\delta$  7.57-7.54 (m, 4H), 7.46-7.41 (m, 4H), 7.34-7.28 (m, 3H), 7.22 (m, 3H), 6.65 (s, 1H), 4.22 (t,  $J = 6.5$  Hz, 2H), 2.74 (t,  $J = 7.5$  Hz, 2H), 2.05-1.99 (m, 2H);  $^{13}\text{C-NMR}$  (125 MHz,  $\text{CDCl}_3$ )  $\delta$  153.5, 141.2, 140.5, 137.2, 136.3, 128.7, 128.44, 128.40, 127.7, 127.0, 126.8, 126.0, 118.9, 64.7, 32.2, 30.5; **HRMS** (ESI)  $m/z$  calculated for  $\text{C}_{22}\text{H}_{22}\text{NO}_2$   $[\text{M}+\text{H}]^+$  : 332.1645, found 332.1652.

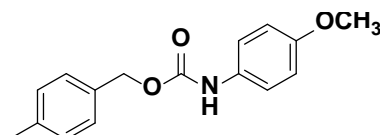

(3f) Yellow solid, m.p. 110-111 °C;  $^1\text{H-NMR}$  (500 MHz,  $\text{CDCl}_3$ )  $\delta$  7.30-7.29 (m, 4H), 7.18 (d,  $J = 7.5$  Hz, 2H), 6.83 (d,  $J = 9.0$  Hz, 2H), 5.14 (s, 2H), 3.78 (s, 3H), 2.36 (s, 3H);  $^{13}\text{C-NMR}$  (125 MHz,  $\text{CDCl}_3$ )  $\delta$  155.9, 153.7, 138.2, 133.1, 130.8, 129.3, 128.5, 120.6, 114.2, 66.9, 55.5, 21.2; **HRMS** (ESI)  $m/z$  calculated for  $\text{C}_{16}\text{H}_{18}\text{NO}_3$   $[\text{M}+\text{H}]^+$  : 272.1281, found 272.1277.

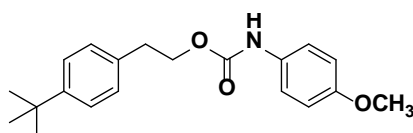

(3g) White solid, m.p. 120-121 °C;  $^1\text{H-NMR}$  (500 MHz,  $\text{CDCl}_3$ )  $\delta$  7.34 (d,  $J = 8.0$  Hz, 2H), 7.27 (m, 2H), 7.18 (d,  $J = 8.0$  Hz, 2H), 6.83 (d,  $J = 8.5$  Hz, 2H), 6.49 (s, 1H), 4.36 (t,  $J = 7.0$  Hz, 2H), 3.78 (s, 3H), 2.95 (t,  $J = 7.5$  Hz, 2H), 1.31 (s, 9H);  $^{13}\text{C-NMR}$  (125 MHz,  $\text{CDCl}_3$ )  $\delta$  155.9, 153.8, 149.4, 134.7, 130.8, 128.5, 125.4, 120.6, 114.2, 65.5, 55.5, 34.8, 34.4, 31.4; **HRMS** (ESI)  $m/z$  calculated for  $\text{C}_{20}\text{H}_{26}\text{NO}_3$   $[\text{M}+\text{H}]^+$  : 328.1907, found 328.1917.

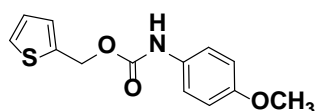

(3h) White solid, m.p. 91-92 °C;  $^1\text{H-NMR}$  (400 MHz,  $\text{CDCl}_3$ )  $\delta$  7.33 (d,  $J = 5.2$  Hz, 1H), 7.29-7.25 (m, 2H), 7.13 (d,  $J = 3.2$  Hz, 1H), 7.00 (t,  $J = 4.0$  Hz, 1H), 6.86-6.83 (m, 2H), 6.61 (s, 1H), 5.33 (s, 2H), 3.78 (s, 3H);  $^{13}\text{C-NMR}$  (125 MHz,  $\text{CDCl}_3$ )  $\delta$  155.9, 153.4, 138.1, 130.6, 128.1, 126.78, 126.76, 120.6, 114.1, 60.9, 55.4; **HRMS** (ESI)  $m/z$  calculated for  $\text{C}_{13}\text{H}_{13}\text{NNaO}_3\text{S}$   $[\text{M}+\text{Na}]^+$  : 286.0508, found 286.0513.

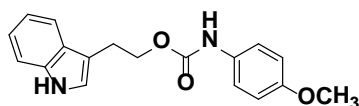

(3i) Gray solid, m.p. 126-127 °C;  $^1\text{H-NMR}$  (500 MHz,  $\text{CDCl}_3$ )  $\delta$  8.04 (s, 1H), 7.64 (d,  $J = 8.0$  Hz, 1H), 7.37 (d,  $J = 8.0$  Hz, 1H), 7.29 (m, 2H), 7.20 (t,  $J = 7.5$  Hz, 1H), 7.13 (t,  $J = 7.5$  Hz, 1H), 7.06 (s, 1H), 6.83 (d,  $J = 8.5$  Hz, 2H), 6.48 (s, 1H), 4.44 (t,  $J = 7.0$  Hz, 2H), 3.78 (s, 3H), 3.14 (t,  $J = 7.0$  Hz, 2H);  $^{13}\text{C-NMR}$  (125 MHz,  $\text{CDCl}_3$ )  $\delta$  156.0, 154.0, 136.2, 130.9, 127.5, 122.1, 122.0,



120.7, 119.4, 118.8, 114.2, 112.0, 111.2, 65.2, 55.5, 25.1; **HRMS** (ESI)  $m/z$  calculated for  $C_{18}H_{18}N_2NaO_3$   $[M+Na]^+$  : 333.1210, found 333.1205.

---

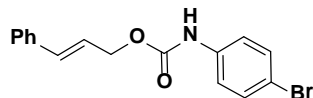

**(3j)** Yellow solid, m.p. 109-110 °C;  **$^1H$ -NMR** (500 MHz,  $CDCl_3$ )  $\delta$  7.40 (t,  $J = 8.5$  Hz, 4H), 7.34-7.26 (m, 5H), 6.70-6.67 (m, 2H), 6.35-6.29 (m, 1H), 4.81 (d,  $J = 6.0$  Hz, 2H);  **$^{13}C$ -NMR** (100 MHz,  $CDCl_3$ )  $\delta$  153.1, 136.9, 136.0, 134.5, 132.0, 128.6, 128.2, 126.6, 123.0, 120.2, 116.0, 66.0; **HRMS** (ESI)  $m/z$  calculated for  $C_{16}H_{14}BrNNaO_2$   $[M+Na]^+$  : 354.0100, found 354.0095.

---

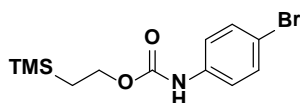

**(3k)** Yellow solid, m.p. 90-91 °C;  **$^1H$ -NMR** (500 MHz,  $CDCl_3$ )  $\delta$  7.38 (m, 2H), 7.27 (m, 2H), 6.65 (s, 1H), 4.25 (t,  $J = 8.5$  Hz, 2H), 1.04 (t,  $J = 8.5$  Hz, 2H), 0.06 (s, 9H);  **$^{13}C$ -NMR** (125 MHz,  $CDCl_3$ )  $\delta$  153.5, 137.1, 131.9, 120.2, 115.7, 63.8, 17.7, 1.0, -1.5; **HRMS** (ESI)  $m/z$  calculated for  $C_{12}H_{18}BrNNaO_2Si$   $[M+Na]^+$  : 338.0182, found 338.0182.

---

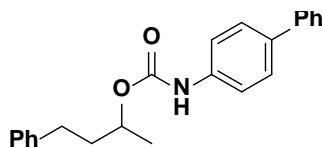

**(3l)** Yellow solid, m.p. 133-134 °C;  **$^1H$ -NMR** (500 MHz,  $CDCl_3$ )  $\delta$  7.56 (t,  $J = 8.5$  Hz, 4H), 7.47-7.41 (m, 4H), 7.34-7.28 (m, 3H), 7.21-7.18 (m, 3H), 6.59 (s, 1H), 5.00-4.96 (m, 1H), 2.78-2.66 (m, 2H), 2.03-1.84 (m, 2H), 1.33 (d,  $J = 6.0$  Hz, 3H);  **$^{13}C$ -NMR** (125 MHz,  $CDCl_3$ )  $\delta$  153.2, 141.6, 140.5, 137.3, 136.2, 128.7, 128.4, 128.3, 127.7, 127.0, 126.8, 125.9, 118.8, 71.8, 37.8, 31.9, 20.4; **HRMS** (ESI)  $m/z$  calculated for  $C_{23}H_{24}NO_2$   $[M+H]^+$  : 346.1802, found 346.1797.

---

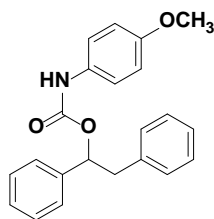

**(3m)** Gray solid, m.p. 81-82 °C;  **$^1H$ -NMR** (500 MHz,  $CDCl_3$ )  $\delta$  7.23-7.18 (m, 5H), 7.17-7.08 (m, 5H), 7.02 (d,  $J = 7.0$  Hz, 2H), 6.72 (d,  $J = 8.5$  Hz, 2H), 6.48 (s, 1H), 5.87 (t,  $J = 7.5$  Hz, 1H), 3.66 (s, 3H), 3.67 (q,  $J = 7.5, 13.5$  Hz, 1H), 3.03 (q,  $J = 7.0, 13.5$  Hz, 1H);  **$^{13}C$ -NMR** (125 MHz,  $CDCl_3$ )  $\delta$  155.9, 153.0, 140.1, 136.9, 130.8, 129.5, 128.3, 128.2, 127.9, 126.52, 126.49, 120.5, 114.1, 77.4, 55.4, 43.0; **HRMS** (ESI)  $m/z$  calculated for  $C_{22}H_{23}NNaO_3$   $[M+Na]^+$  : 384.1570, found 384.1579.

---

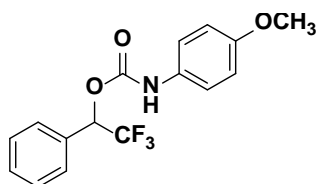

(**3n**) White solid, m.p. 107-108 °C;  $^1\text{H-NMR}$  (500 MHz,  $\text{CDCl}_3$ )  $\delta$  7.47 (m, 2H), 7.40-7.39 (m, 3H), 7.25 (d,  $J = 8.0$  Hz, 2H), 6.90 (s, 1H), 6.82 (d,  $J = 8.5$  Hz, 2H), 6.15 (q,  $J = 7.0$ , 1H), 3.76 (s, 3H);  $^{13}\text{C-NMR}$  (125 MHz,  $\text{CDCl}_3$ )  $\delta$  156.4, 151.4, 131.4, 130.0, 129.8, 128.8, 128.7, 128.0, 126.7, 124.4, 122.2, 120.9, 114.3, 73.1, 72.9, 72.6, 55.4; **HRMS** (ESI)  $m/z$  calculated for  $\text{C}_{16}\text{H}_{15}\text{F}_3\text{NO}_3$   $[\text{M}+\text{H}]^+$  : 326.0999, found 326.1003.

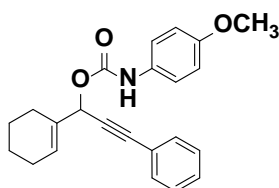

(**3o**) White solid, m.p. 145-146 °C;  $^1\text{H-NMR}$  (500 MHz,  $\text{CDCl}_3$ )  $\delta$  7.44-7.42 (m, 2H), 7.31-7.29 (m, 5H), 6.87 (d,  $J = 9.0$  Hz, 2H), 6.60 (s, 1H), 5.72 (s, 1H), 5.31 (dd,  $J = 4.0, 7.5$  Hz, 2H), 3.78 (s, 3H), 2.85-2.83 (m, 1H), 2.38-2.33 (m, 1H), 2.01-1.97 (m, 1H), 1.83 (m, 1H), 1.71-1.68 (m, 2H), 1.62-1.55 (m, 2H);  $^{13}\text{C-NMR}$  (125 MHz,  $\text{CDCl}_3$ )  $\delta$  156.0, 152.9, 151.5, 131.3, 130.8, 128.2, 127.9, 123.6, 120.6, 114.2, 102.5, 93.4, 86.2, 74.9, 55.5, 33.7, 29.8, 26.8, 23.1; **HRMS** (ESI)  $m/z$  calculated for  $\text{C}_{23}\text{H}_{23}\text{NNaO}_3$   $[\text{M}+\text{Na}]^+$  : 384.1570, found 384.1579.

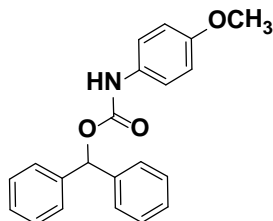

(**3p**) White solid, m.p. 143-144 °C;  $^1\text{H-NMR}$  (500 MHz,  $\text{CDCl}_3$ )  $\delta$  7.29-7.21 (m, 8H), 7.21-7.16 (m, 4H), 6.80 (s, 1H), 6.75 (d,  $J = 9.0$  Hz, 2H), 6.65 (s, 1H), 3.68 (s, 3H);  $^{13}\text{C-NMR}$  (125 MHz,  $\text{CDCl}_3$ )  $\delta$  156.0, 152.9, 140.2, 130.8, 128.5, 127.9, 127.1, 120.5, 114.2, 77.7, 55.5; **HRMS** (ESI)  $m/z$  calculated for  $\text{C}_{21}\text{H}_{19}\text{NNaO}_3$   $[\text{M}+\text{Na}]^+$  : 356.1257, found 356.1261.

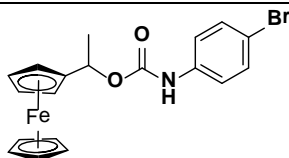

(**3q**) Brown solid, m.p. 90-91 °C;  $^1\text{H-NMR}$  (500 MHz,  $\text{CDCl}_3$ )  $\delta$  7.25 (d,  $J = 8.5$  Hz, 2H), 6.51 (d,  $J = 9.0$  Hz, 2H), 4.28-4.21 (m, 1H), 4.18 (s, 5H), 4.16-4.13 (m, 3H), 3.93 (s, 1H), 1.48 (d,  $J = 6.5$  Hz, 3H);  $^{13}\text{C-NMR}$  (100 MHz,  $\text{CDCl}_3$ )  $\delta$  146.3, 132.0, 114.7, 108.5, 93.0, 68.4, 67.8, 67.6, 67.0, 66.0, 47.2, 20.7; **HRMS** (ESI)  $m/z$  calculated for  $\text{C}_{19}\text{H}_{20}\text{BrFeNO}_2$   $[\text{M}+\text{H}]^+$  : 429.0021, found 429.0016.

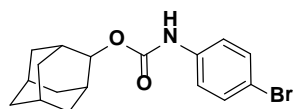

**(3r)** Yellow solid, m.p. 126-127 °C;  $^1\text{H-NMR}$  (500 MHz,  $\text{CDCl}_3$ )  $\delta$  7.40 (d,  $J = 8.5$  Hz, 2H), 7.29 (d,  $J = 8.0$  Hz, 2H), 6.68 (s, 1H), 4.92 (s, 1H), 2.08 (s, 2H), 2.00-2.03 (m, 2H), 1.74-1.88(m, 8H), 1.57-1.62 (m, 3H);  $^{13}\text{C-NMR}$  (125 MHz,  $\text{CDCl}_3$ )  $\delta$  153.0, 137.3, 131.9, 120.0, 115.6, 78.3, 37.3, 36.3, 32.0, 31.8, 27.2, 26.9; **HRMS** (ESI)  $m/z$  calculated for  $\text{C}_{17}\text{H}_{20}\text{BrNNaO}_2$   $[\text{M}+\text{Na}]^+$  : 372.0570, found 372.0572.

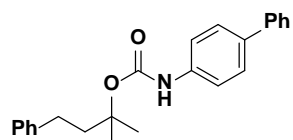

**(3s)** White solid, m.p. 127-128 °C;  $^1\text{H-NMR}$  (400 MHz,  $\text{CDCl}_3$ )  $\delta$  7.56-7.51 (m, 4H), 7.41 (t,  $J = 7.6$  Hz, 4H), 7.31-7.28 (m, 3H), 7.22-7.16 (m, 3H), 6.50 (s, 1H), 2.73-2.69 (m, 2H), 2.16-2.12 (m, 2H), 1.58 (s, 6H);  $^{13}\text{C-NMR}$  (100 MHz,  $\text{CDCl}_3$ )  $\delta$  152.5, 142.1, 140.6, 137.5, 135.9, 128.7, 128.4, 127.6, 126.9, 126.7, 125.8, 118.8, 82.3, 42.9, 30.4, 26.3; **HRMS** (ESI)  $m/z$  calculated for  $\text{C}_{24}\text{H}_{26}\text{NO}_2$   $[\text{M}+\text{H}]^+$  : 360.1958, found 360.1961.

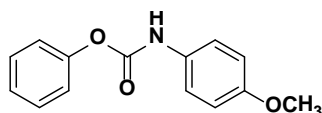

**(5a)** White solid, m.p. 99-100 °C;  $^1\text{H-NMR}$  (500 MHz,  $\text{CDCl}_3$ )  $\delta$  7.39-7.33 (m, 4H), 7.21 (m, 1H), 7.18 (d,  $J = 8.0$  Hz, 2H), 6.96 (s, 1H), 6.84 (d,  $J = 8.5$  Hz, 2H), 3.78 (s, 3H);  $^{13}\text{C-NMR}$  (125 MHz,  $\text{CDCl}_3$ )  $\delta$  156.1, 151.9, 150.6, 130.4, 129.3, 125.6, 121.6, 120.6, 114.2, 55.4; **HRMS** (ESI)  $m/z$  calculated for  $\text{C}_{14}\text{H}_{14}\text{NO}_3$   $[\text{M}+\text{H}]^+$  : 244.0968, found 244.0964.

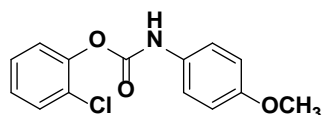

**(5b)** White solid, m.p. 110-111 °C;  $^1\text{H-NMR}$  (500 MHz,  $\text{CDCl}_3$ )  $\delta$  7.45 (d,  $J = 8.0$  Hz, 1H), 7.36 (d,  $J = 8.0$  Hz, 2H), 7.30 (t,  $J = 8.0$  Hz, 2H), 7.20 (t,  $J = 6.5$  Hz, 1H), 7.00 (s, 1H), 6.87 (d,  $J = 9.0$  Hz, 2H);  $^{13}\text{C-NMR}$  (125 MHz,  $\text{CDCl}_3$ )  $\delta$  156.3, 150.8, 146.7, 130.3, 127.7, 127.3, 126.9, 124.1, 120.7, 114.3, 55.5; **HRMS** (ESI)  $m/z$  calculated for  $\text{C}_{14}\text{H}_{13}\text{ClNO}_3$   $[\text{M}+\text{H}]^+$  : 278.0578, found 278.0586.

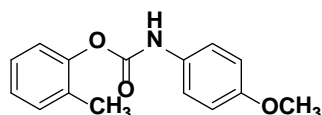

**(5c)** White solid, m.p. 125-126 °C;  $^1\text{H-NMR}$  (500 MHz,  $\text{CDCl}_3$ )  $\delta$  7.32 (d,  $J = 8.0$  Hz, 2H), 7.22-7.18 (m, 2H), 7.14-7.10 (m, 3H), 6.80 (d,  $J = 8.5$  Hz, 2H), 3.75 (s, 3H), 2.23 (s, 3H);  $^{13}\text{C-NMR}$  (125 MHz,  $\text{CDCl}_3$ )  $\delta$  155.9, 151.8, 149.1, 131.0, 130.6, 130.5, 126.8, 125.8, 122.2, 120.4, 114.2, 55.4, 16.1; **HRMS** (ESI)  $m/z$  calculated for  $\text{C}_{15}\text{H}_{15}\text{NNaO}_3$   $[\text{M}+\text{Na}]^+$  : 280.0944,

found 280.0954.

---

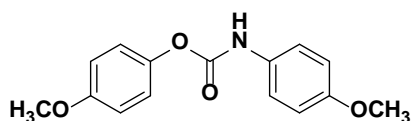

(5d) White solid, m.p. 162-163 °C;  $^1\text{H-NMR}$  (500 MHz, DMSO)  $\delta$  9.97 (s, 1H), 7.41 (d,  $J$  = 8.0 Hz, 2H), 7.12 (d,  $J$  = 8.5 Hz, 2H), 6.95 (d,  $J$  = 8.5 Hz, 2H), 6.90 (d,  $J$  = 8.5 Hz, 2H), 3.75 (s, 3H), 3.71 (s, 3H);  $^{13}\text{C-NMR}$  (125 MHz, DMSO)  $\delta$  157.1, 155.6, 152.7, 144.5, 132.2, 123.4, 120.5, 114.8, 114.6, 55.9, 55.7; **HRMS** (ESI)  $m/z$  calculated for  $\text{C}_{15}\text{H}_{16}\text{NO}_4$   $[\text{M}+\text{H}]^+$  : 274.1074, found 274.1065.

---

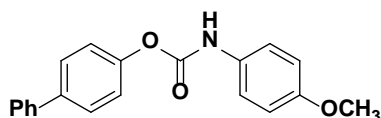

(5e) White solid, m.p. 164-165 °C;  $^1\text{H-NMR}$  (500 MHz,  $\text{CDCl}_3$ )  $\delta$  7.60-7.55 (m, 4H), 7.43 (t,  $J$  = 7.5 Hz, 2H), 7.37-7.30 (m, 3H), 7.24 (d,  $J$  = 7.5 Hz, 2H), 6.95 (s, 1H), 6.86 (d,  $J$  = 8.5 Hz, 2H), 3.78 (s, 3H);  $^{13}\text{C-NMR}$  (125 MHz,  $\text{CDCl}_3$ )  $\delta$  156.2, 151.9, 150.0, 140.4, 138.7, 130.3, 128.8, 128.1, 127.3, 127.1, 121.9, 120.6, 114.3, 55.5; **HRMS** (ESI)  $m/z$  calculated for  $\text{C}_{20}\text{H}_{18}\text{NO}_3$   $[\text{M}+\text{H}]^+$  : 320.1281, found 320.1296.

---

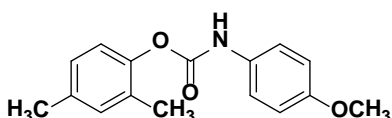

(5f) White solid, m.p. 144-145 °C;  $^1\text{H-NMR}$  (400 MHz,  $\text{CDCl}_3$ )  $\delta$  7.30 (d,  $J$  = 8.0 Hz, 2H), 7.07 (s, 1H), 7.01 (d,  $J$  = 8.0 Hz, 2H), 6.98 (s, 1H), 6.79 (d,  $J$  = 8.4 Hz, 2H), 3.74 (s, 3H), 2.28 (s, 3H), 2.19 (s, 3H);  $^{13}\text{C-NMR}$  (100 MHz,  $\text{CDCl}_3$ )  $\delta$  155.9, 152.0, 146.9, 135.4, 131.7, 130.7, 130.2, 127.3, 121.8, 120.4, 114.2, 55.4, 20.7, 16.0; **HRMS** (ESI)  $m/z$  calculated for  $\text{C}_{16}\text{H}_{18}\text{NO}_3$   $[\text{M}+\text{H}]^+$  : 272.1281, found 272.1281.

---

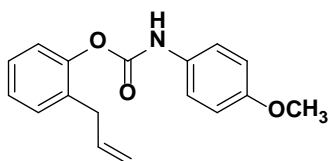

(5g) White solid, m.p. 85-86 °C;  $^1\text{H-NMR}$  (500 MHz,  $\text{CDCl}_3$ )  $\delta$  7.28 (d,  $J$  = 8.5 Hz, 2H), 7.22-7.20 (m, 3H), 7.17-7.12 (m, 2H), 6.78 (d,  $J$  = 9.0 Hz, 2H), 5.92-5.85 (m, 1H), 5.06-5.02 (m, 2H), 3.71 (s, 3H), 3.34 (d,  $J$  = 6.5 Hz, 2H);  $^{13}\text{C-NMR}$  (125 MHz,  $\text{CDCl}_3$ )  $\delta$  155.9, 151.9, 148.6, 135.8, 132.4, 130.5, 130.1, 127.3, 125.9, 122.5, 120.5, 116.1, 114.1, 55.3, 34.4; **HRMS** (ESI)  $m/z$  calculated for  $\text{C}_{17}\text{H}_{17}\text{NNaO}_3$   $[\text{M}+\text{Na}]^+$  : 306.1101, found 306.1092.

---

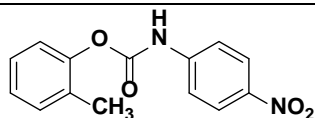

(5h) White solid, m.p. 149-150 °C;  $^1\text{H-NMR}$  (400 MHz,  $\text{CDCl}_3$ )  $\delta$  8.14 (d,  $J$  = 9.2 Hz, 2H), 7.73

(s, 1H), 7.54 (d,  $J = 9.2$  Hz, 2H), 7.27-7.18 (m, 3H), 7.12 (d,  $J = 8.0$  Hz, 1H), 2.24 (s, 3H);  $^{13}\text{C-NMR}$  (100 MHz,  $\text{CDCl}_3$ )  $\delta$  151.2, 148.5, 143.5, 143.1, 131.3, 130.4, 127.1, 126.5, 125.1, 121.9, 118.0, 16.0; **HRMS** (ESI)  $m/z$  calculated for  $\text{C}_{14}\text{H}_{12}\text{N}_2\text{NaO}_4$   $[\text{M}+\text{Na}]^+$ : 295.0689, found 295.0692.

---

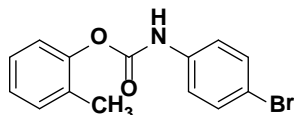

(**5i**) White solid, m.p. 145-146 °C;  $^1\text{H-NMR}$  (400 MHz, DMSO)  $\delta$  10.44 (s, 1H), 7.50 (m, 4H), 7.29 (d,  $J = 7.2$  Hz, 1H), 7.22 (t,  $J = 8.4$  Hz, 1H), 7.17 (t,  $J = 8.0$  Hz, 2H), 2.19 (s, 3H);  $^{13}\text{C-NMR}$  (100 MHz, DMSO)  $\delta$  151.9, 149.4, 138.7, 132.2, 131.5, 130.8, 127.5, 126.3, 123.0, 120.8, 115.1, 16.2; **HRMS** (ESI)  $m/z$  calculated for  $\text{C}_{14}\text{H}_{12}\text{BrNNaO}_2$   $[\text{M}+\text{Na}]^+$ : 327.9944, found 327.9936.

---

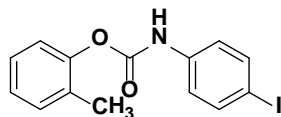

(**5j**) White solid, m.p. 156-157 °C;  $^1\text{H-NMR}$  (400 MHz,  $\text{CDCl}_3$ )  $\delta$  7.58 (d,  $J = 8.8$  Hz, 2H), 7.24-7.15 (m, 5H), 7.09 (d,  $J = 8.0$  Hz, 2H), 2.23 (s, 3H);  $^{13}\text{C-NMR}$  (100 MHz,  $\text{CDCl}_3$ )  $\delta$  151.3, 148.8, 137.9, 137.3, 131.2, 130.5, 126.9, 126.1, 122.0, 120.5, 86.8, 16.1; **HRMS** (ESI)  $m/z$  calculated for  $\text{C}_{14}\text{H}_{12}\text{INNaO}_2$   $[\text{M}+\text{Na}]^+$ : 375.9805, found 375.9802.

---

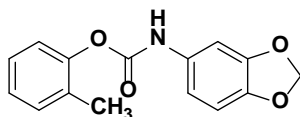

(**5k**) White solid, m.p. 109-110 °C;  $^1\text{H-NMR}$  (400 MHz,  $\text{CDCl}_3$ )  $\delta$  7.25-7.19 (m, 2H), 7.14-7.09 (m, 3H), 6.98 (s, 1H), 6.72 (s, 2H), 5.93 (s, 2H), 2.24 (s, 3H);  $^{13}\text{C-NMR}$  (125 MHz,  $\text{CDCl}_3$ )  $\delta$  151.7, 149.0, 147.8, 143.8, 131.7, 131.0, 130.6, 126.8, 125.9, 122.1, 111.9, 108.0, 101.6, 101.2, 16.0; **HRMS** (ESI)  $m/z$  calculated for  $\text{C}_{15}\text{H}_{13}\text{NNaO}_4$   $[\text{M}+\text{Na}]^+$ : 294.0737, found 294.0736.

---

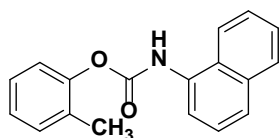

(**5l**) White solid, m.p. 136-137 °C;  $^1\text{H-NMR}$  (400 MHz, DMSO)  $\delta$  10.17 (s, 1H), 8.20 (d,  $J = 8.0$  Hz, 1H), 7.96 (d,  $J = 7.6$  Hz, 1H), 7.80 (d,  $J = 8.0$  Hz, 1H), 7.68 (d,  $J = 7.6$  Hz, 1H), 7.62-7.50 (m, 3H), 7.32-7.17 (m, 4H), 2.27 (s, 3H);  $^{13}\text{C-NMR}$  (125 MHz, DMSO)  $\delta$  153.5, 149.8, 134.2, 133.8, 131.4, 130.9, 128.6, 127.4, 126.7, 126.6, 126.1, 126.0, 123.1, 123.0, 121.9, 16.3; **HRMS** (ESI)  $m/z$  calculated for  $\text{C}_{18}\text{H}_{15}\text{NNaO}_2$   $[\text{M}+\text{Na}]^+$ : 300.0995, found 300.0996.

---

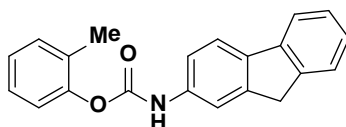

**(5m)** White solid, m.p. 151-152 °C;  $^1\text{H-NMR}$  (400 MHz,  $\text{CDCl}_3$ )  $\delta$  7.74-7.67 (m, 3H), 7.49 (d,  $J = 7.6$  Hz, 1H), 7.35-7.31 (m, 2H), 7.28-7.20 (m, 3H), 7.15 (m, 3H), 3.85 (s, 2H), 2.27 (s, 3H);  $^{13}\text{C-NMR}$  (100 MHz,  $\text{CDCl}_3$ )  $\delta$  151.5, 149.0, 144.5, 143.0, 141.2, 137.7, 136.2, 131.1, 130.6, 126.9, 126.7, 126.3, 126.0, 124.9, 122.2, 120.2, 119.5, 117.5, 115.6, 37.0, 16.2; **HRMS** (ESI)  $m/z$  calculated for  $\text{C}_{21}\text{H}_{17}\text{NNaO}_2$   $[\text{M}+\text{Na}]^+$ : 338.1151, found 338.1156.

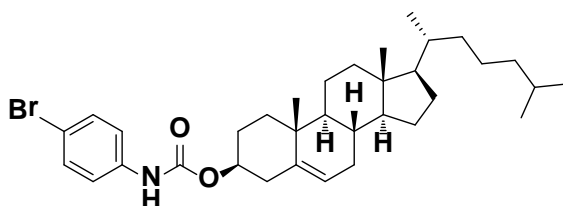

**(6a)** White solid, m.p. 153-154 °C;  $^1\text{H-NMR}$  (400 MHz,  $\text{CDCl}_3$ )  $\delta$  7.39 (d,  $J = 8.8$  Hz, 2H), 7.26 (d,  $J = 9.6$  Hz, 2H), 6.56 (s, 1H), 5.40 (s, 1H), 4.60 (m, 1H), 2.45-2.29 (m, 2H), 2.03-1.83 (m, 5H), 1.62-0.86 (m, 33H), 0.68 (s, 3H);  $^{13}\text{C-NMR}$  (100 MHz,  $\text{CDCl}_3$ )  $\delta$  152.8, 139.4, 137.1, 131.9, 122.8, 120.0, 115.6, 75.1, 56.6, 56.1, 49.9, 42.2, 39.6, 39.5, 38.4, 36.9, 36.5, 36.1, 35.8, 31.84, 31.78, 28.2, 28.0, 24.2, 23.8, 22.8, 22.6, 21.0, 19.3, 18.7, 11.8; **HRMS** (ESI)  $m/z$  calculated for  $\text{C}_{34}\text{H}_{50}\text{BrNNaO}_2$   $[\text{M}+\text{Na}]^+$ : 606.2917, found 606.2921.

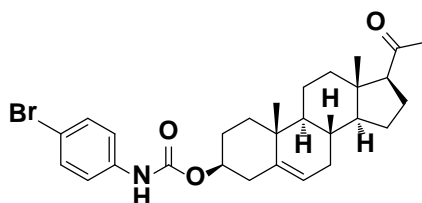

**(6b)** Yellow solid, m.p. 234-235 °C;  $^1\text{H-NMR}$  (400 MHz,  $\text{CDCl}_3$ )  $\delta$  7.39 (d,  $J = 7.2$  Hz, 2H), 7.27 (d,  $J = 6.8$  Hz, 2H), 6.61 (s, 1H), 5.39 (m, 1H), 4.62-4.58 (m, 1H), 2.54 (t,  $J = 7.2$  Hz, 1H), 2.42 (t,  $J = 7.6$  Hz, 1H), 2.33 (m, 1H), 2.18 (m, 1H), 2.13 (s, 3H), 2.07-1.15 (m, 16H), 1.03 (s, 3H), 0.64 (s, 3H);  $^{13}\text{C-NMR}$  (125 MHz,  $\text{CDCl}_3$ )  $\delta$  209.6, 152.8, 139.5, 137.1, 131.9, 122.5, 120.1, 115.775.0, 63.7, 56.8, 49.8, 44.0, 38.8, 38.3, 36.9, 36.6, 31.8, 31.7, 31.6, 28.0, 24.5, 22.8, 21.0, 19.3, 13.2; **HRMS** (ESI)  $m/z$  calculated for  $\text{C}_{28}\text{H}_{36}\text{BrNNaO}_3$   $[\text{M}+\text{Na}]^+$ : 536.1771, found 536.1775.

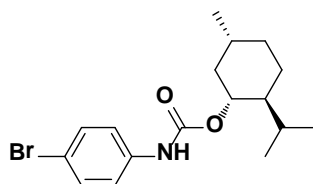

**(6c)** Yellow solid, m.p. 99-100 °C;  $^1\text{H-NMR}$  (400 MHz,  $\text{CDCl}_3$ )  $\delta$  7.39 (d,  $J = 8.4$  Hz, 2H), 7.28 (d,  $J = 8.4$  Hz, 2H), 6.60 (s, 1H), 4.68-4.62 (m, 1H), 2.08 (m, 1H), 1.97-1.92 (m, 1H), 1.70-1.62 (m, 2H), 1.51-1.49 (m, 1H), 1.39-1.33 (m, 1H), 1.12-0.85 (m, 9H), 0.80 (d,  $J = 6.8$  Hz, 3H);  $^{13}\text{C-NMR}$

(100 MHz, CDCl<sub>3</sub>)  $\delta$  153.1, 137.2, 131.9, 120.0, 115.6, 75.4, 47.2, 41.3, 34.2, 31.4, 26.2, 23.4, 22.0, 20.8, 16.4; **HRMS** (ESI)  $m/z$  calculated for C<sub>17</sub>H<sub>24</sub>BrNNaO<sub>2</sub> [M+Na]<sup>+</sup> : 376.0883, found 376.0878.

---

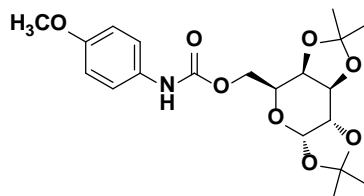

**(6d)** Yellow oil; **<sup>1</sup>H-NMR** (500 MHz, CDCl<sub>3</sub>)  $\delta$  7.28 (d,  $J$  = 9.0 Hz, 2H), 7.27 (d,  $J$  = 9.0 Hz, 2H), 6.73 (s, 1H), 5.57 (d,  $J$  = 5.0 Hz, 1H), 4.64-4.62 (m, 1H), 4.41-4.34 (m, 2H), 4.28-4.24 (m, 2H), 4.13-4.08 (m, 1H), 3.78 (s, 3H), 1.52 (s, 3H), 1.46 (s, 3H), 1.35 (s, 3H), 1.34 (s, 3H); **<sup>13</sup>C-NMR** (125 MHz, CDCl<sub>3</sub>)  $\delta$  155.9, 153.5, 130.8, 120.5, 114.1, 109.6, 108.8, 96.30, 96.25, 71.0, 70.7, 70.3, 66.3, 64.1, 55.4, 26.0, 24.9, 24.4; **HRMS** (ESI)  $m/z$  calculated for C<sub>20</sub>H<sub>27</sub>NNaO<sub>8</sub> [M+Na]<sup>+</sup> : 432.1629, found 432.1622.

---

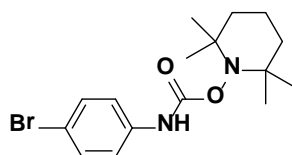

**(10a)** White solid, m.p. 127-128 °C; **<sup>1</sup>H-NMR** (400 MHz, CDCl<sub>3</sub>)  $\delta$  8.98 (s, 1H), 7.46-7.42 (m, 2H), 7.38-7.35 (m, 2H), 1.73-1.61 (m, 5H), 1.50-1.46 (m, 1H), 1.27 (s, 6H), 1.17 (s, 6H); **<sup>13</sup>C-NMR** (100 MHz, CDCl<sub>3</sub>)  $\delta$  155.0, 136.2, 132.0, 120.6, 116.4, 61.1, 39.8, 31.7, 20.6, 16.6; **HRMS** (ESI)  $m/z$  calculated for C<sub>16</sub>H<sub>23</sub>BrN<sub>2</sub>NaO<sub>2</sub> [M+Na]<sup>+</sup> : 377.0835, found 377.0831.

---

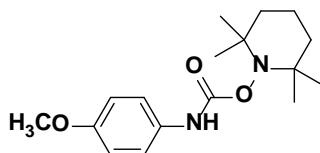

**(10b)** White solid, m.p. 107-108 °C; **<sup>1</sup>H-NMR** (400 MHz, CDCl<sub>3</sub>)  $\delta$  8.77 (s, 1H), 7.36-7.32 (m, 2H), 6.90-6.86 (m, 2H), 3.79 (s, 3H), 1.69-1.56 (m, 5H), 1.50-1.44 (m, 1H), 1.27 (s, 6H), 1.19 (s, 6H); **<sup>13</sup>C-NMR** (100 MHz, CDCl<sub>3</sub>)  $\delta$  156.3, 155.6, 130.2, 121.2, 114.3, 60.9, 55.5, 39.8, 31.69, 31.65, 20.7, 20.6, 16.7; **HRMS** (ESI)  $m/z$  calculated for C<sub>17</sub>H<sub>26</sub>N<sub>2</sub>NaO<sub>3</sub> [M+Na]<sup>+</sup> : 329.1836, found 329.1831.

---

## V. DFT study of the mechanism

The density functional theory (DFT) study was performed using Gaussian 09 package, at the M06/SDD/6-311++G\*\*/SMD (Chlorobenzene, 353.15 K)//B3LYP/LANL2DZ (f=1.611)/6-31G\*\* calculation level.

### Figure S1. DFT study on the generation of phenoxy radical from phenol

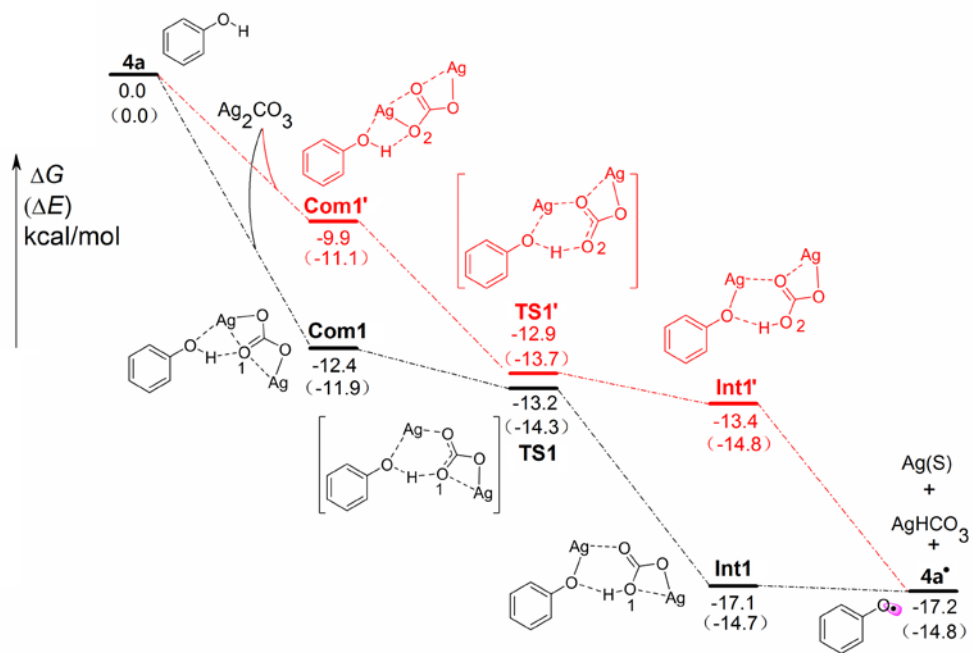

Figure S2. DFT study on the cross-coupling of isocyanide 2a and phenol 4a

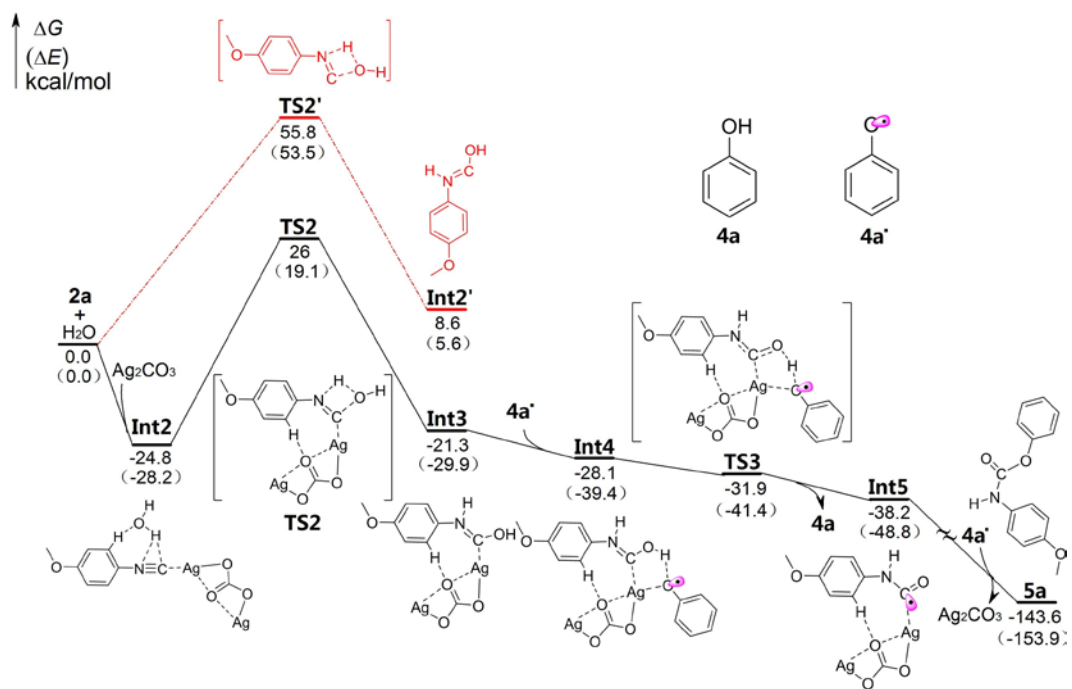



## VI. NMR spectra copies

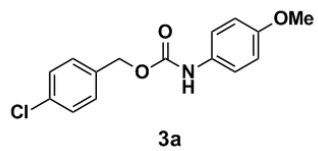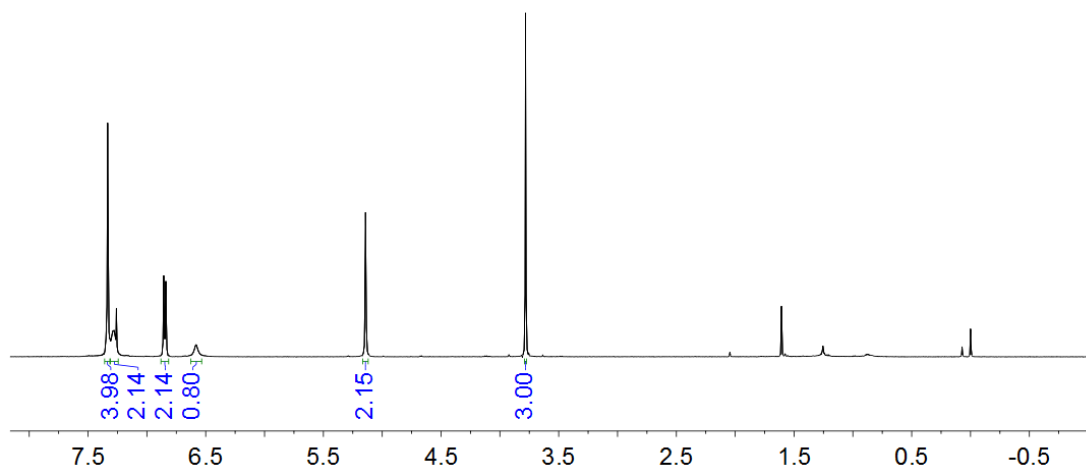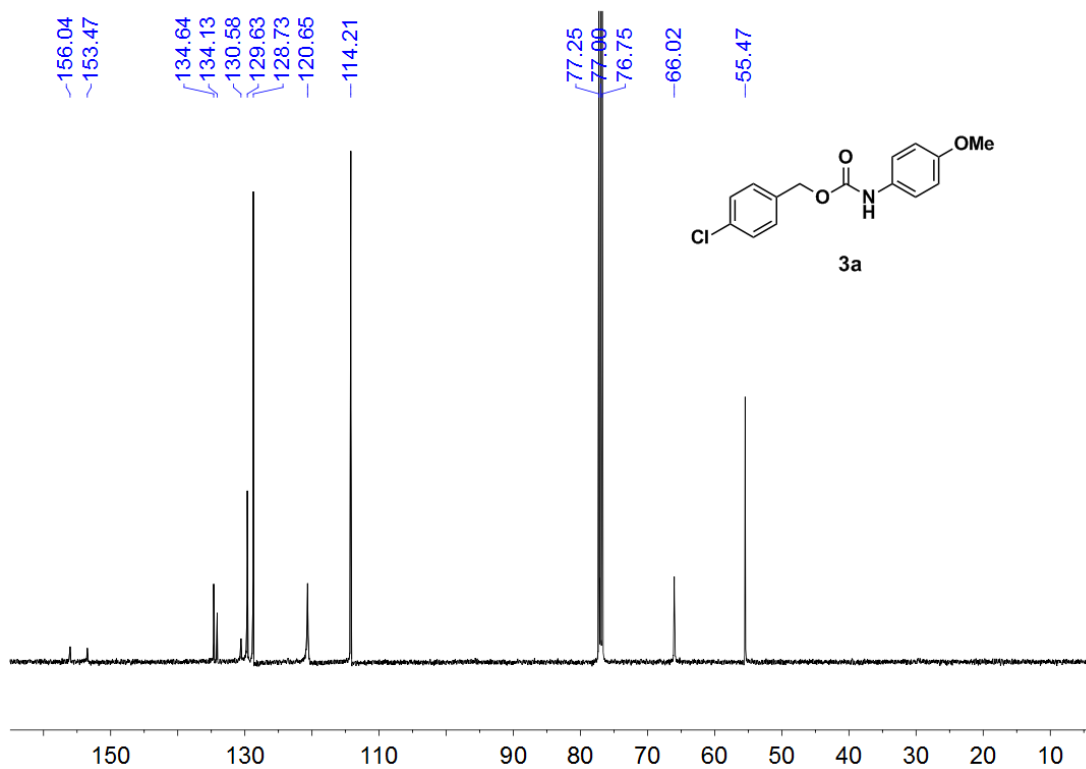

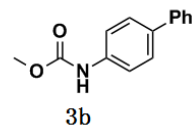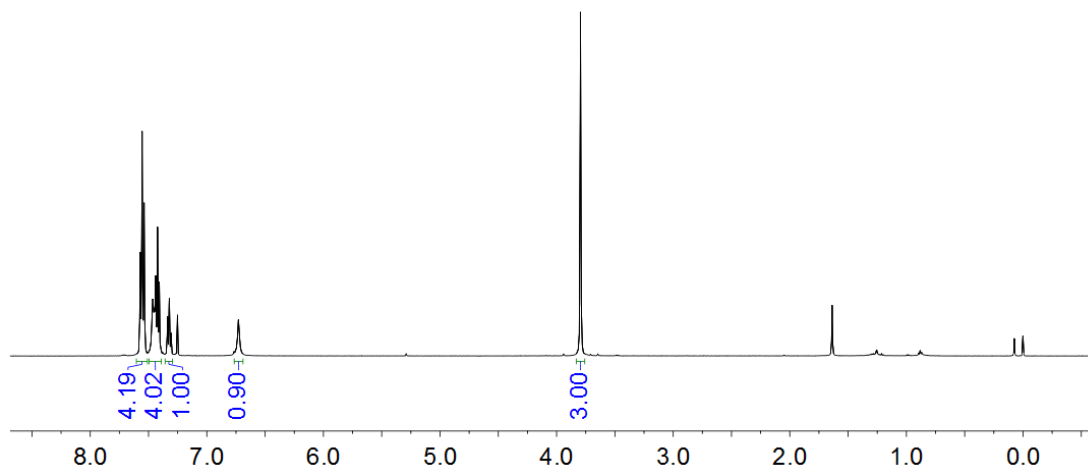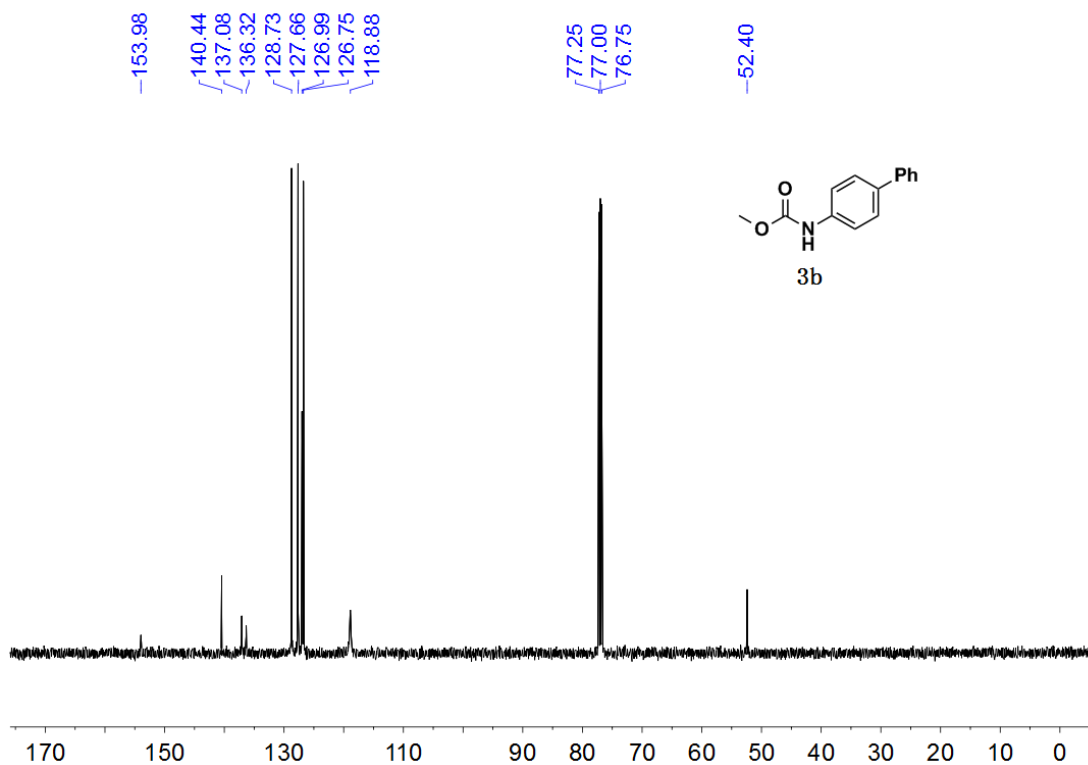

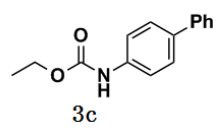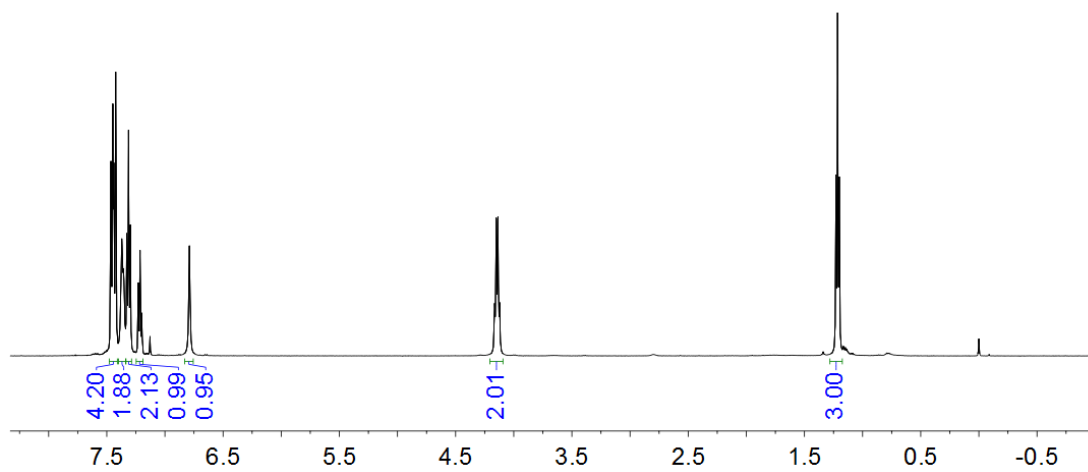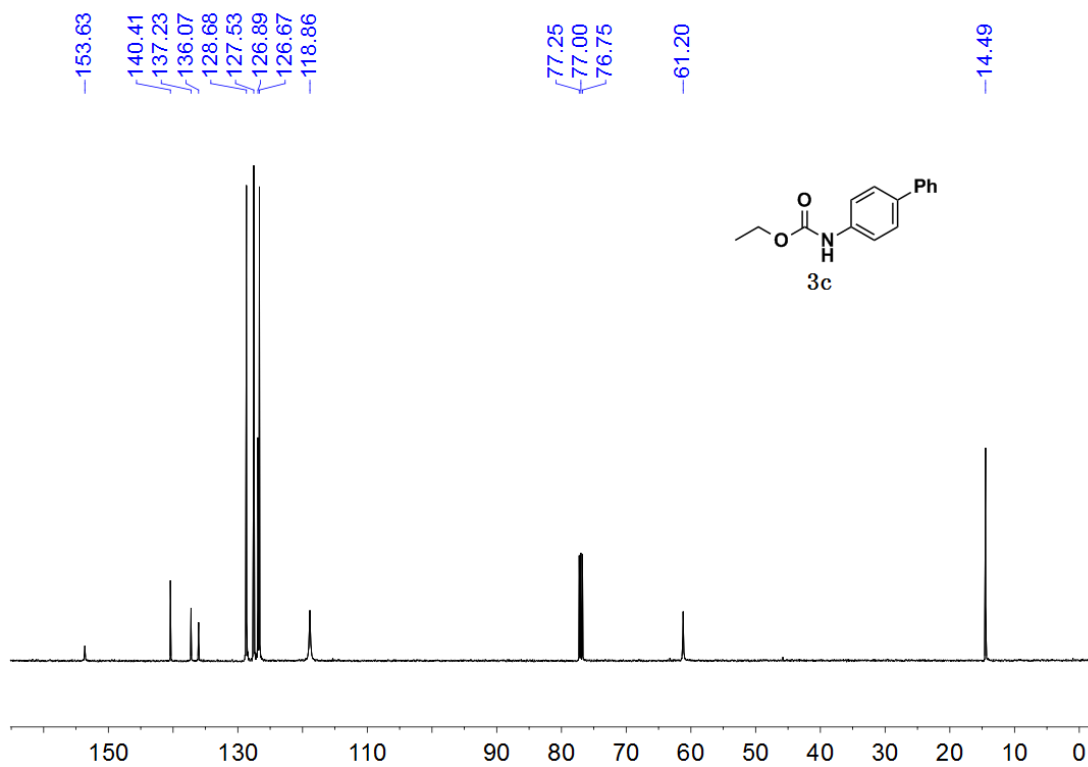

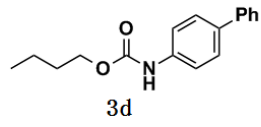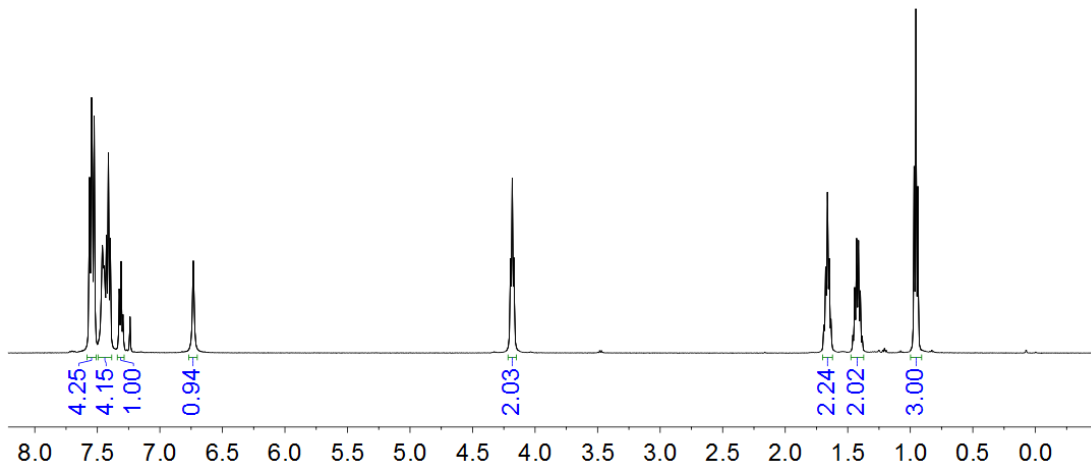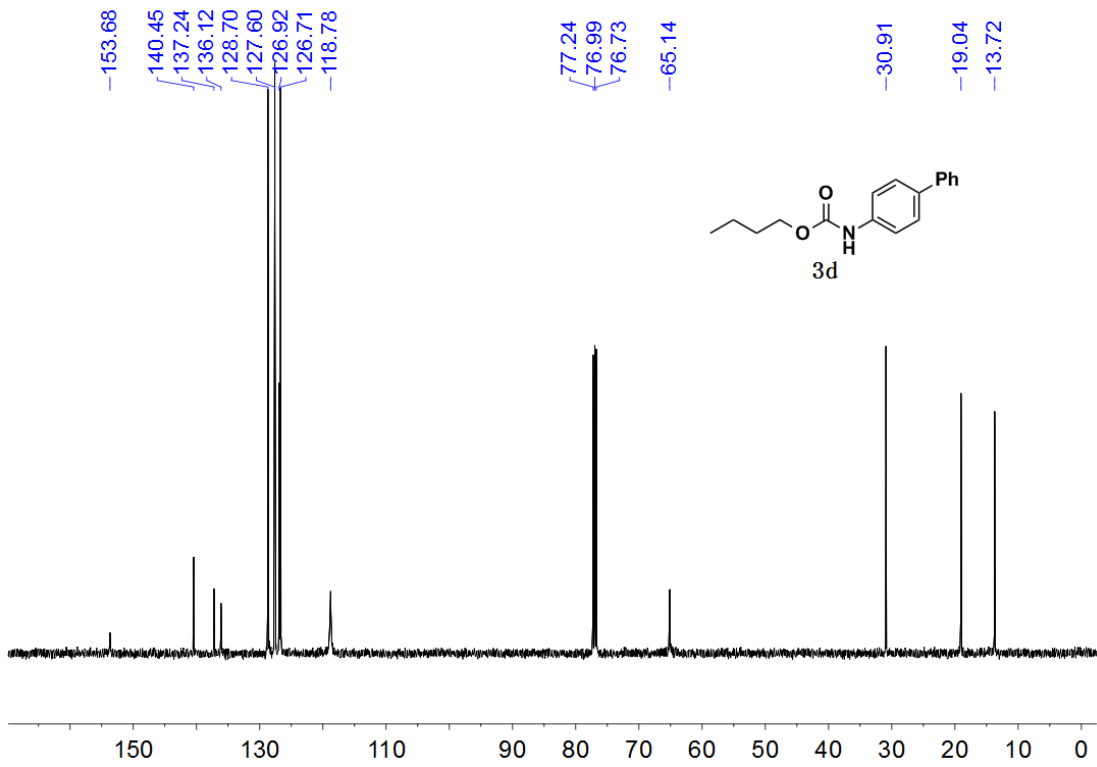

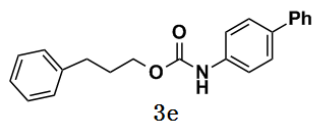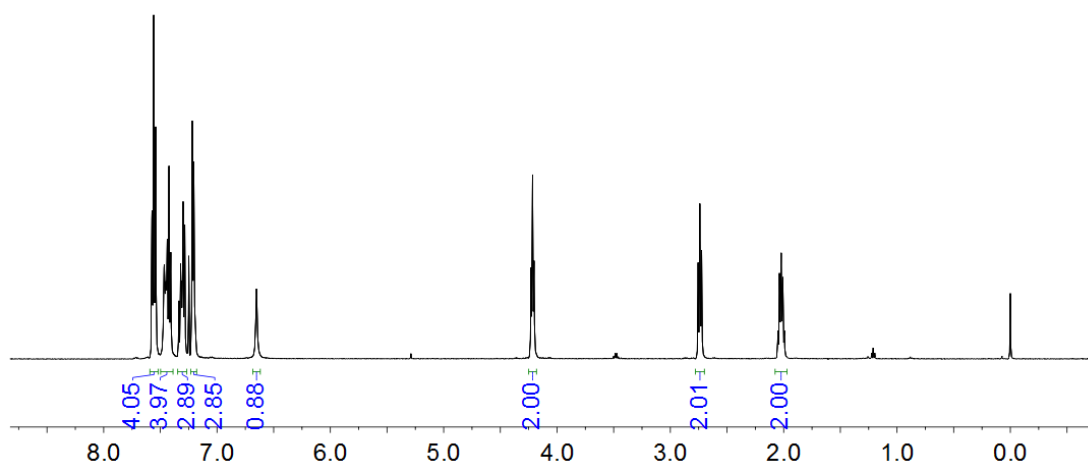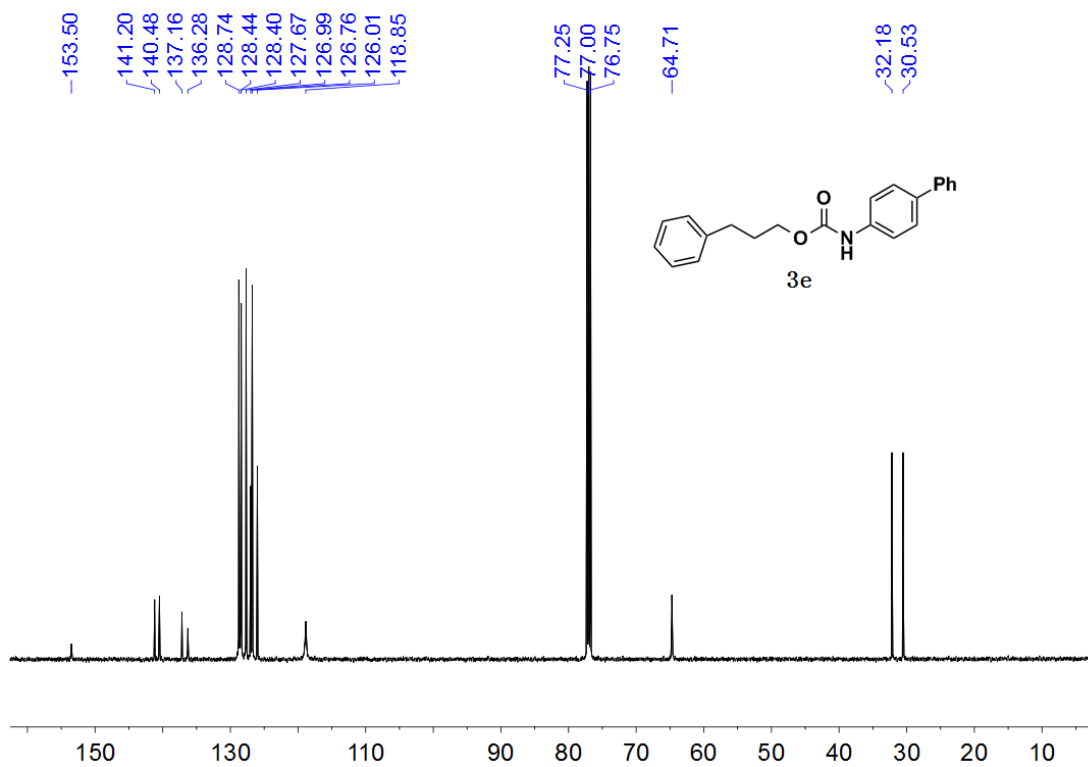

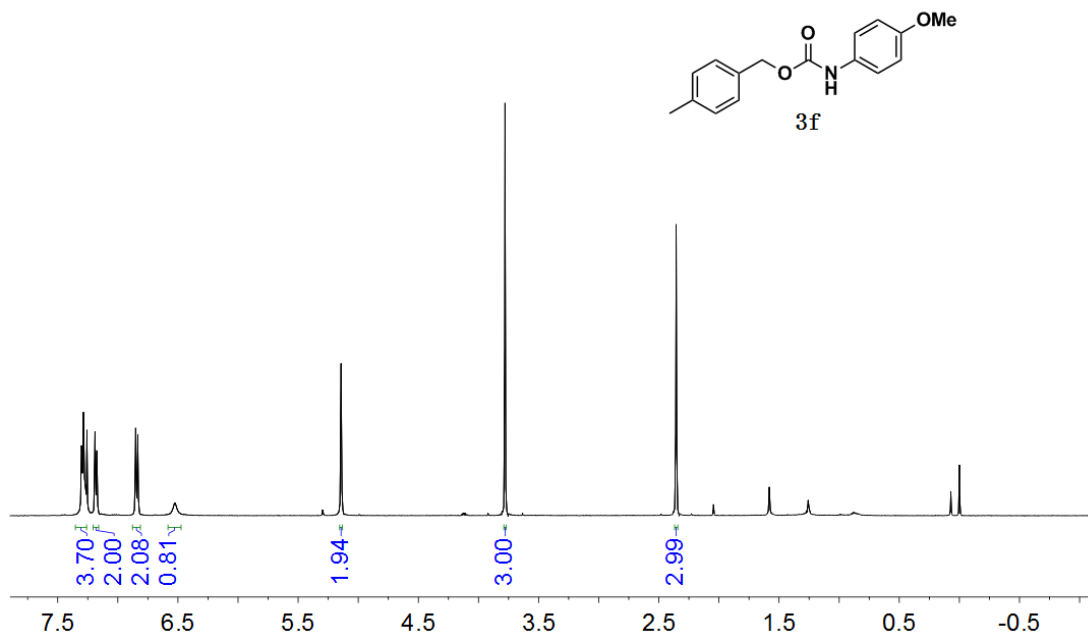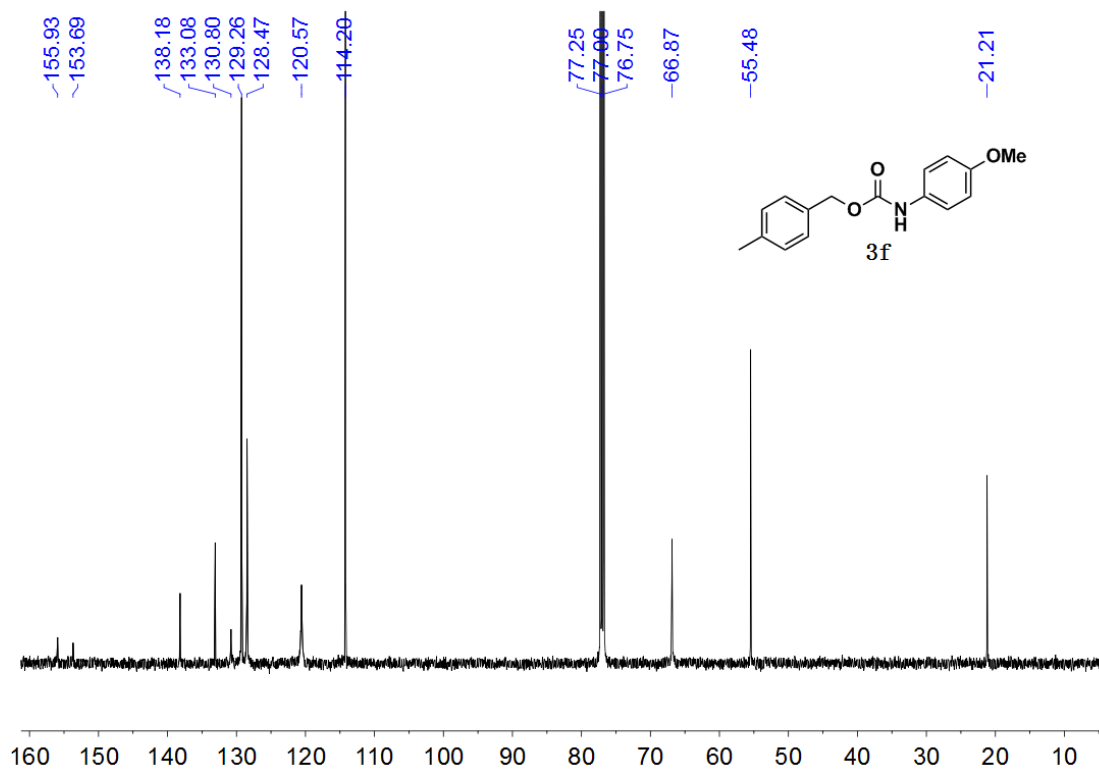

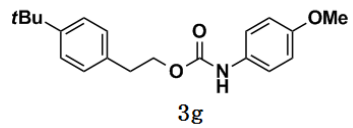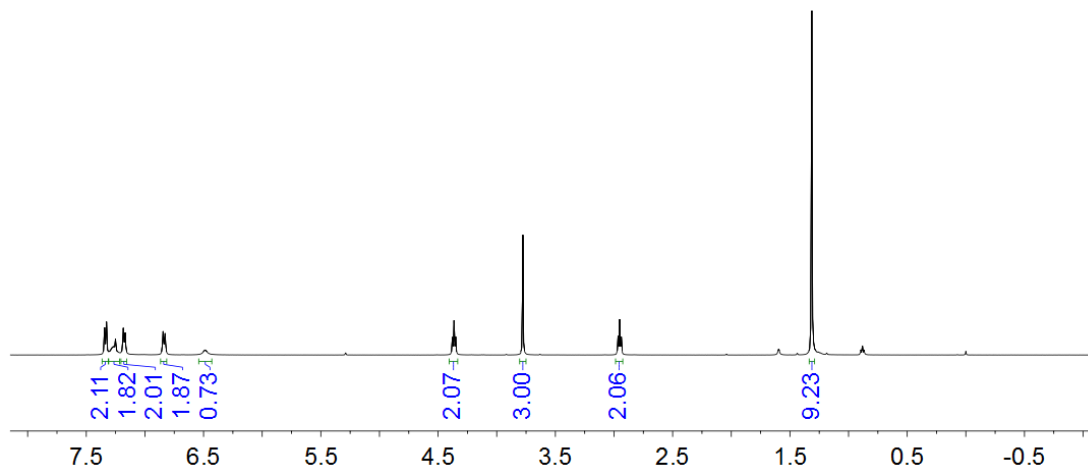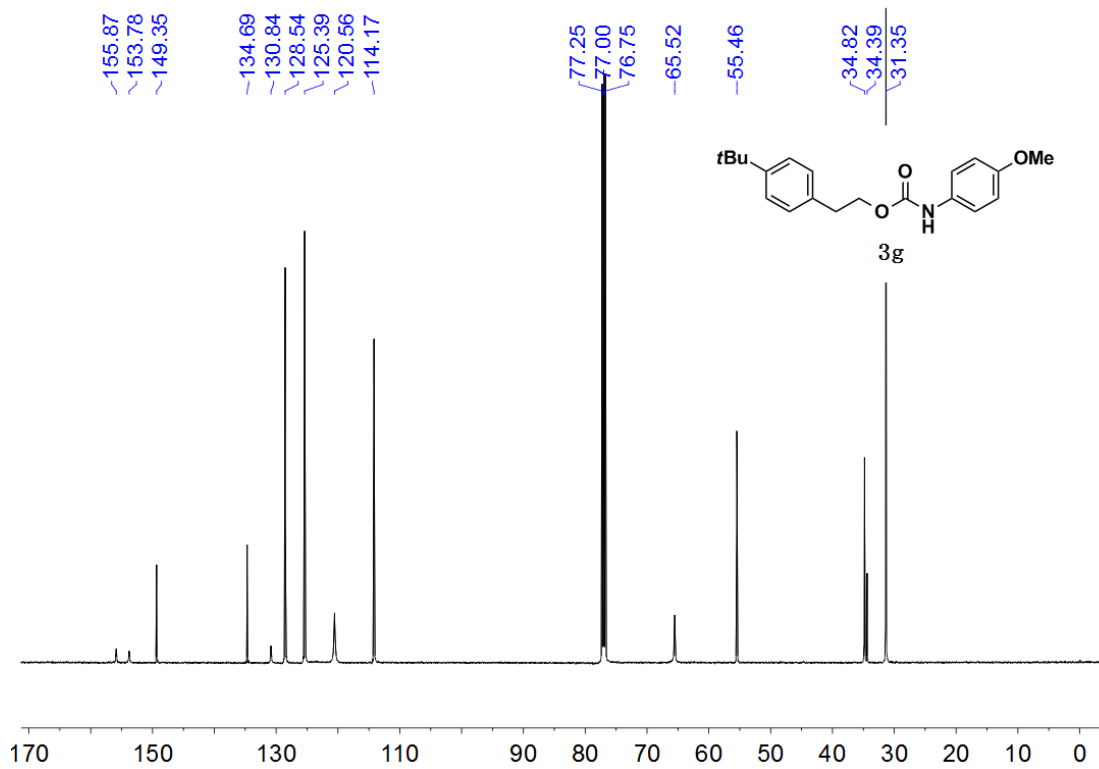

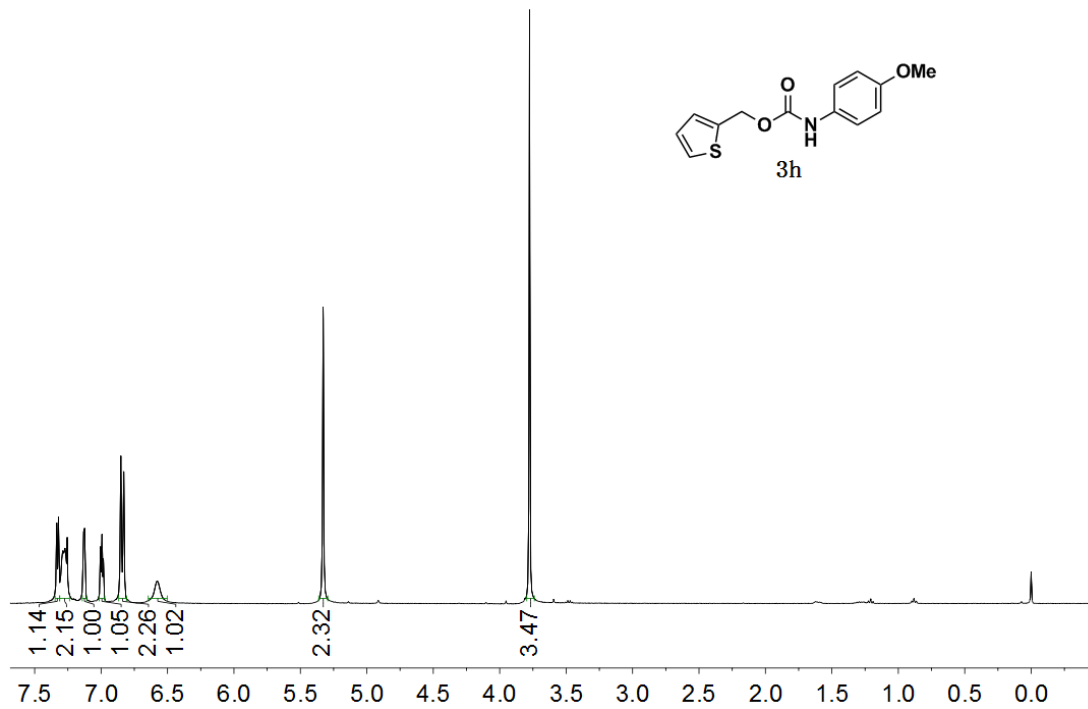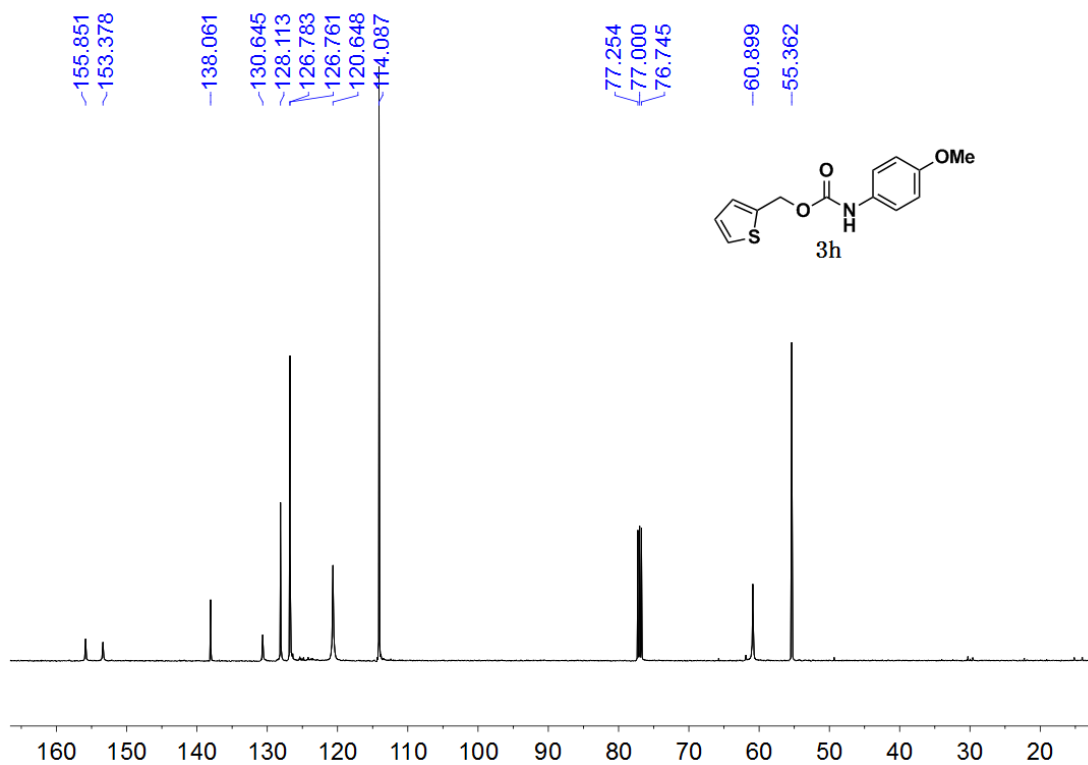



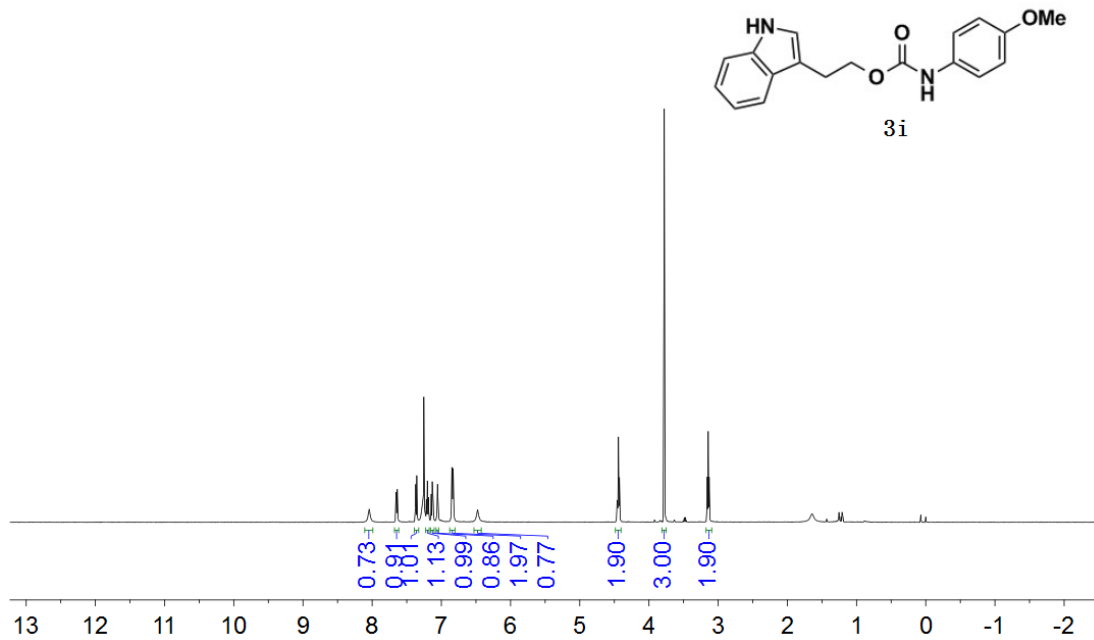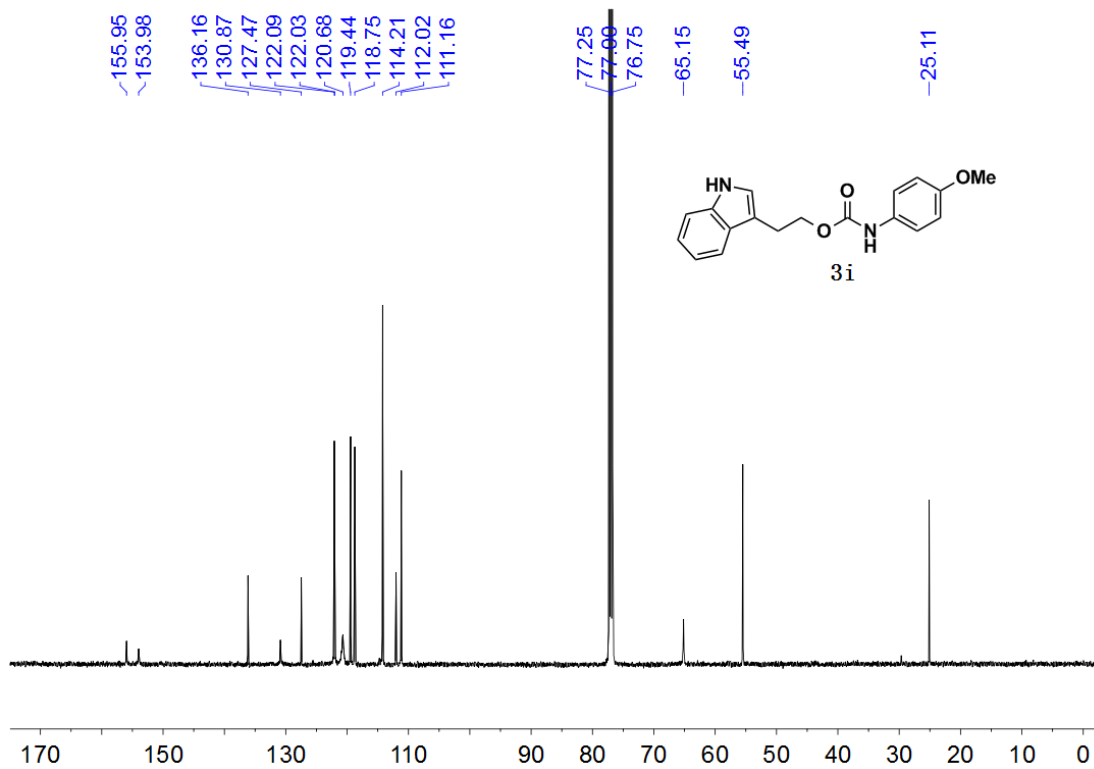

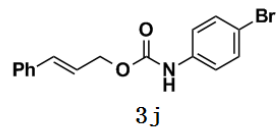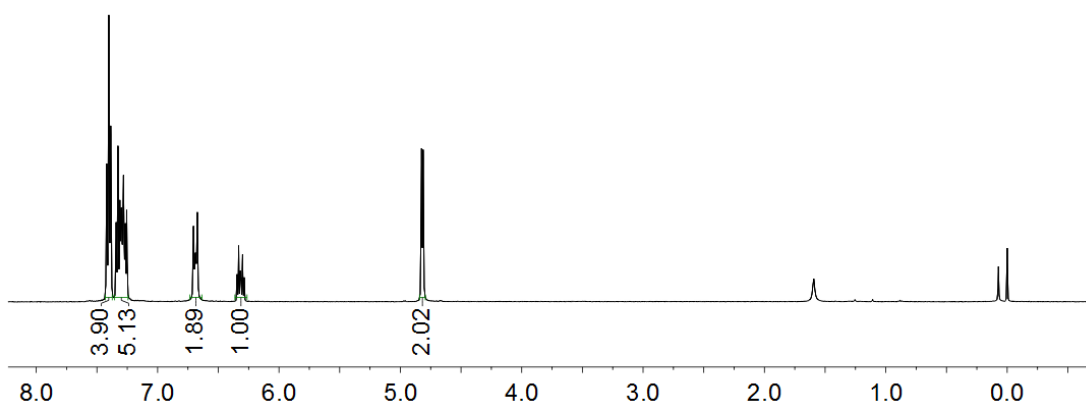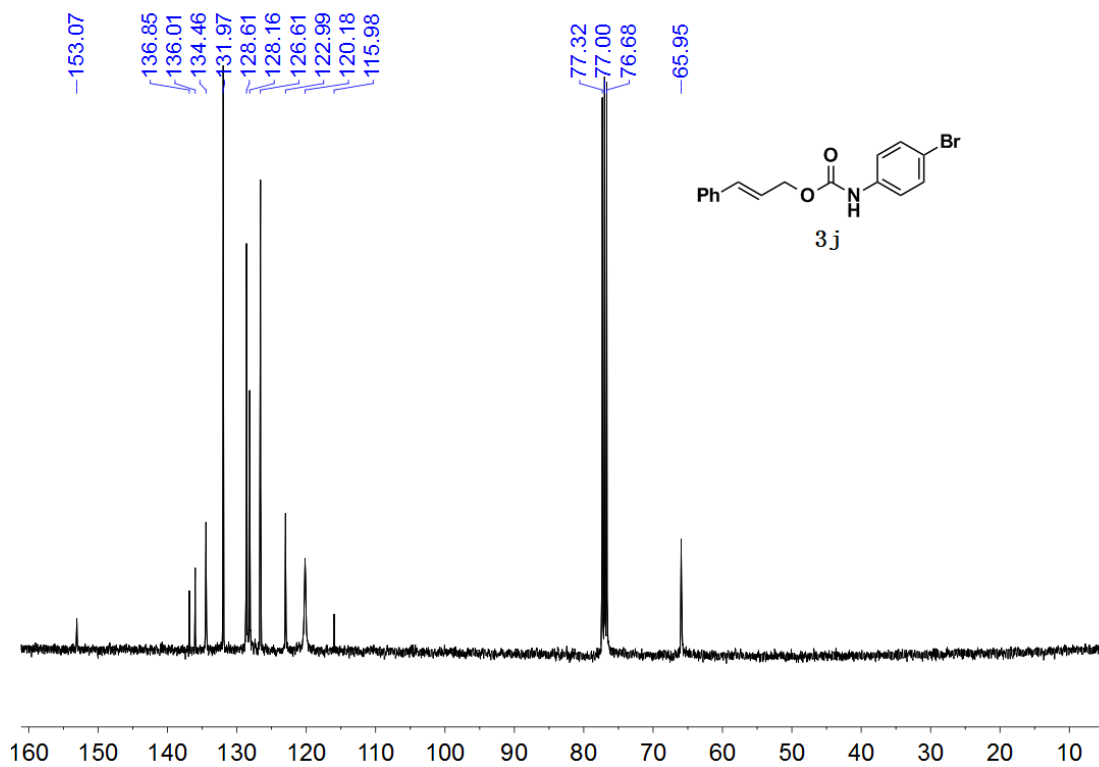

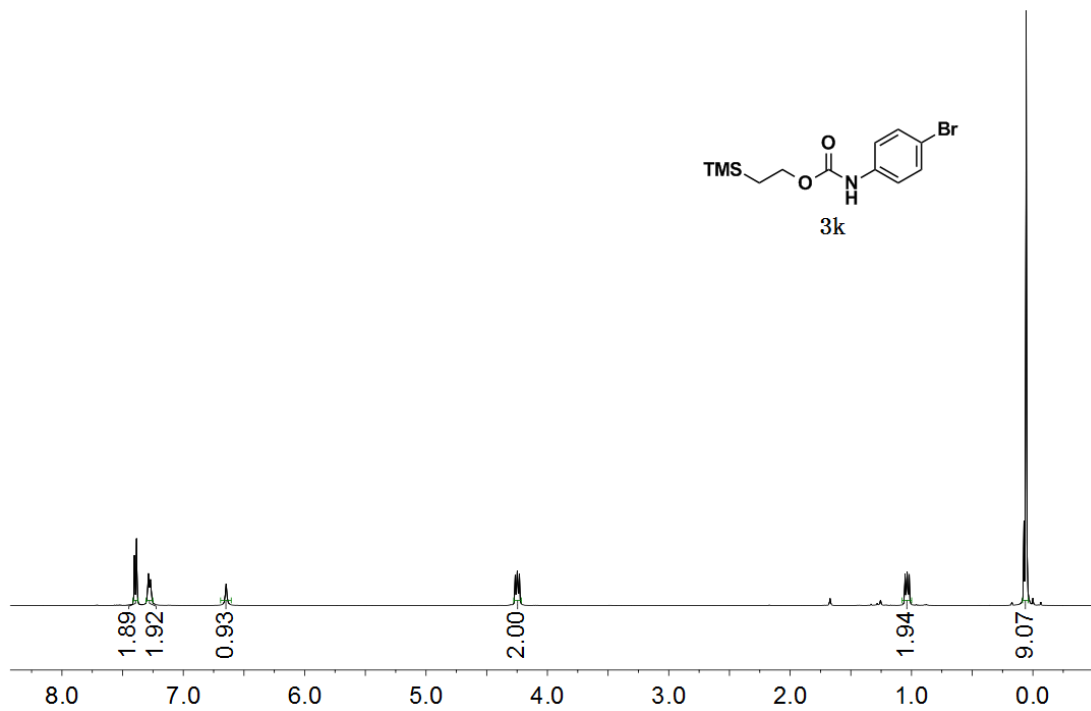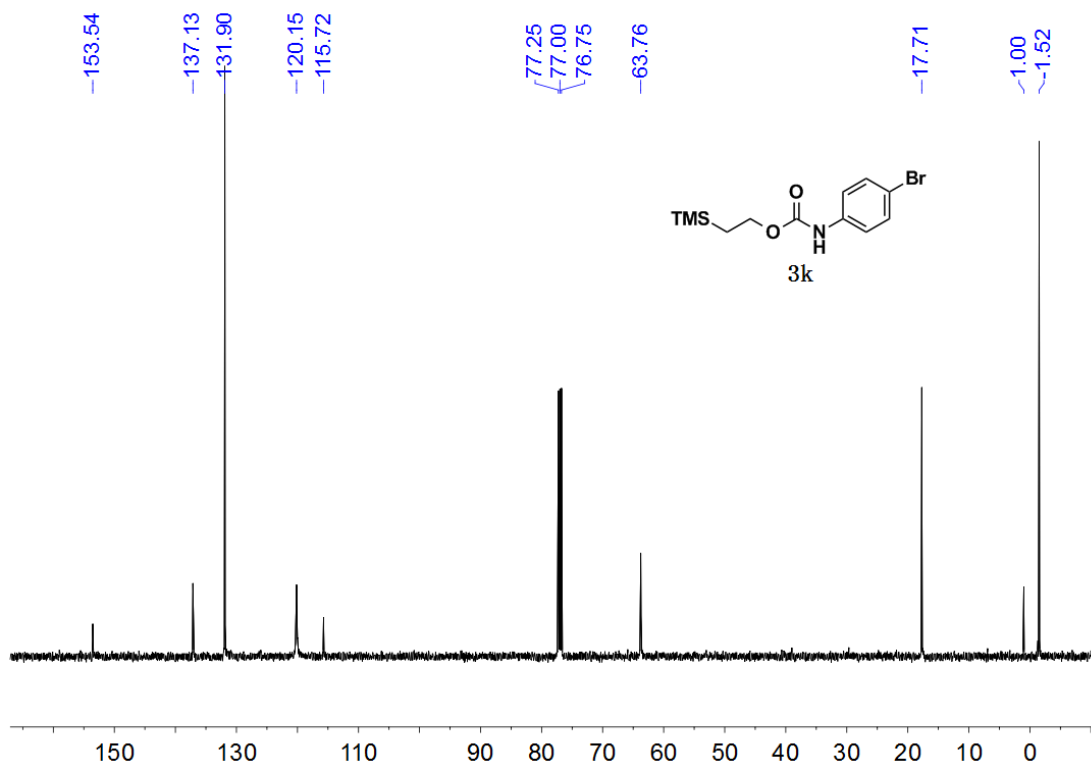

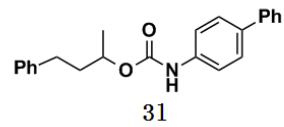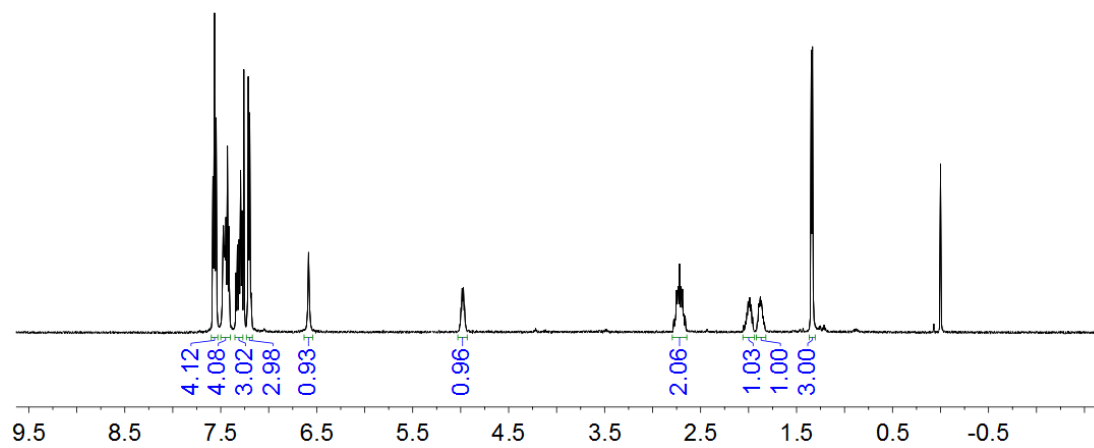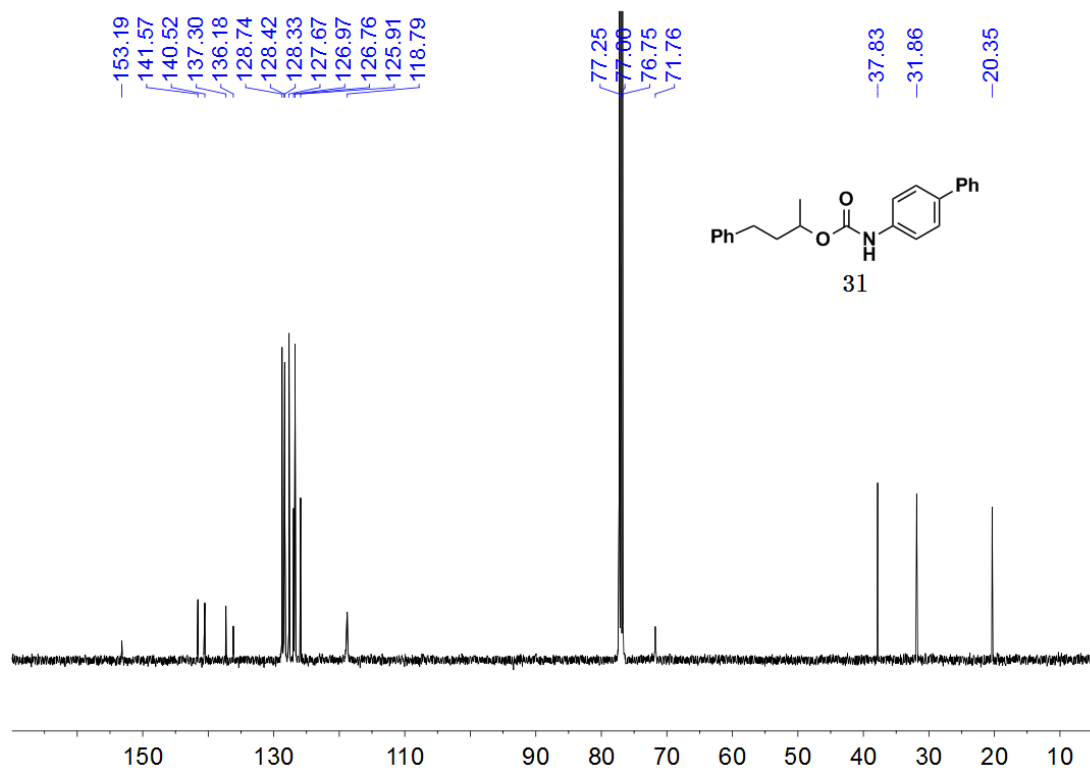

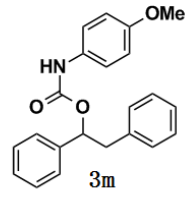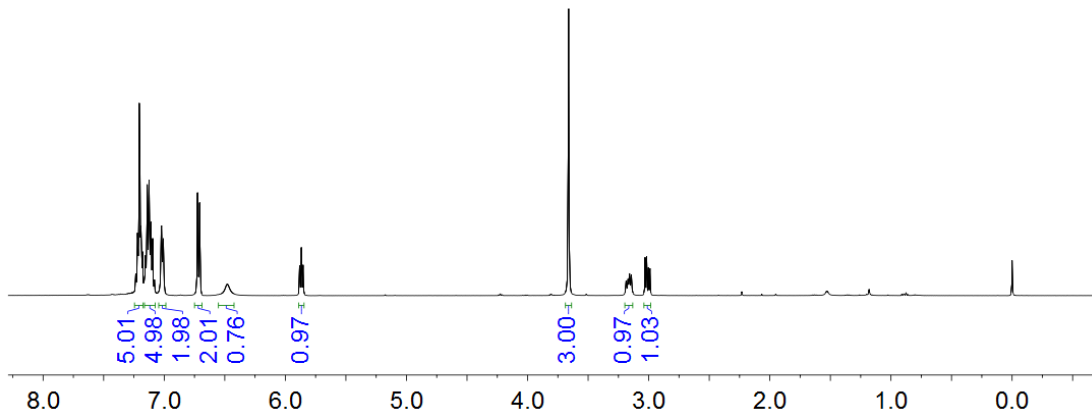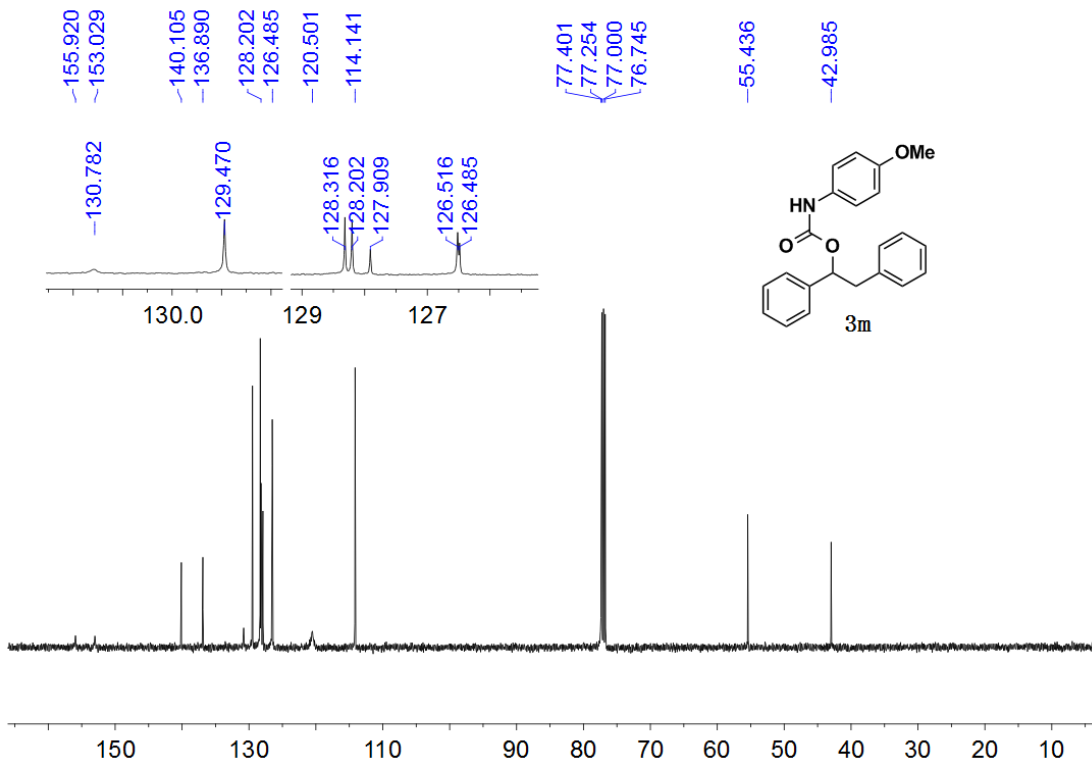

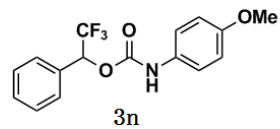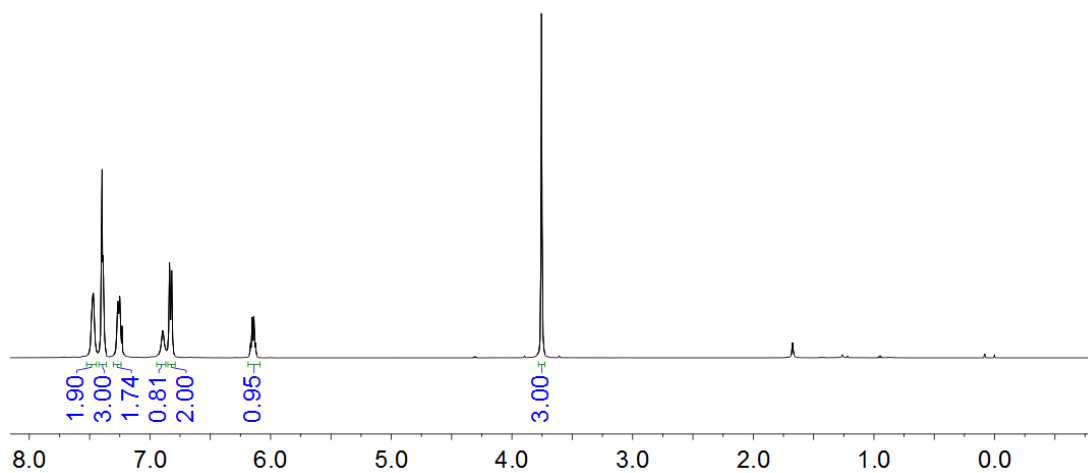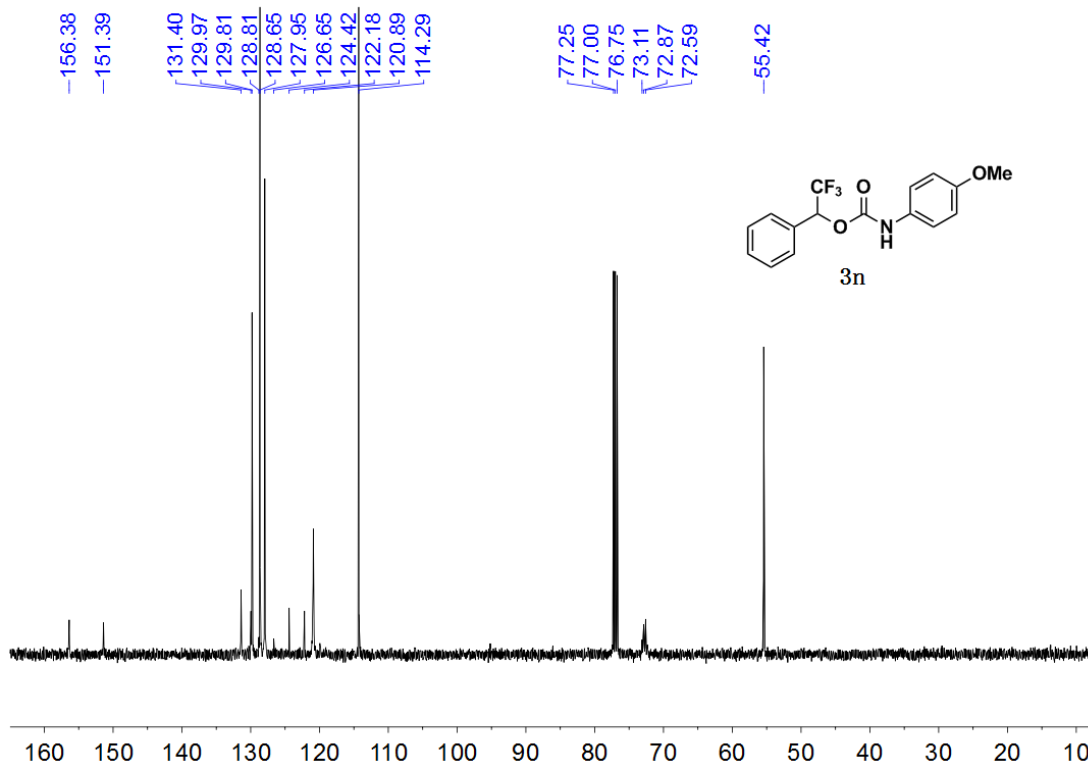

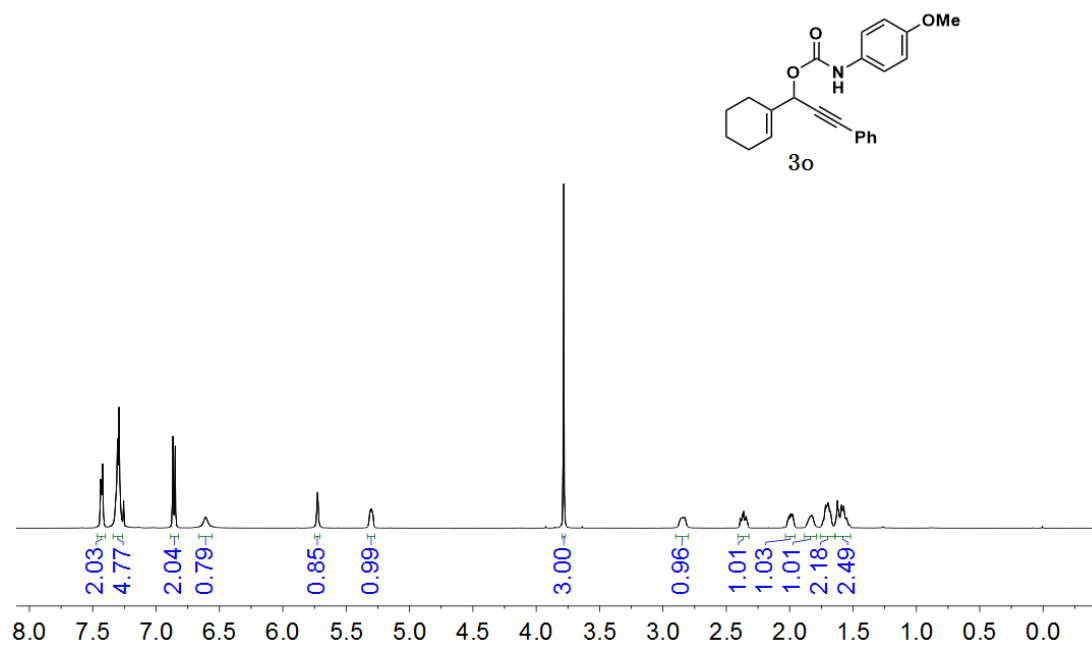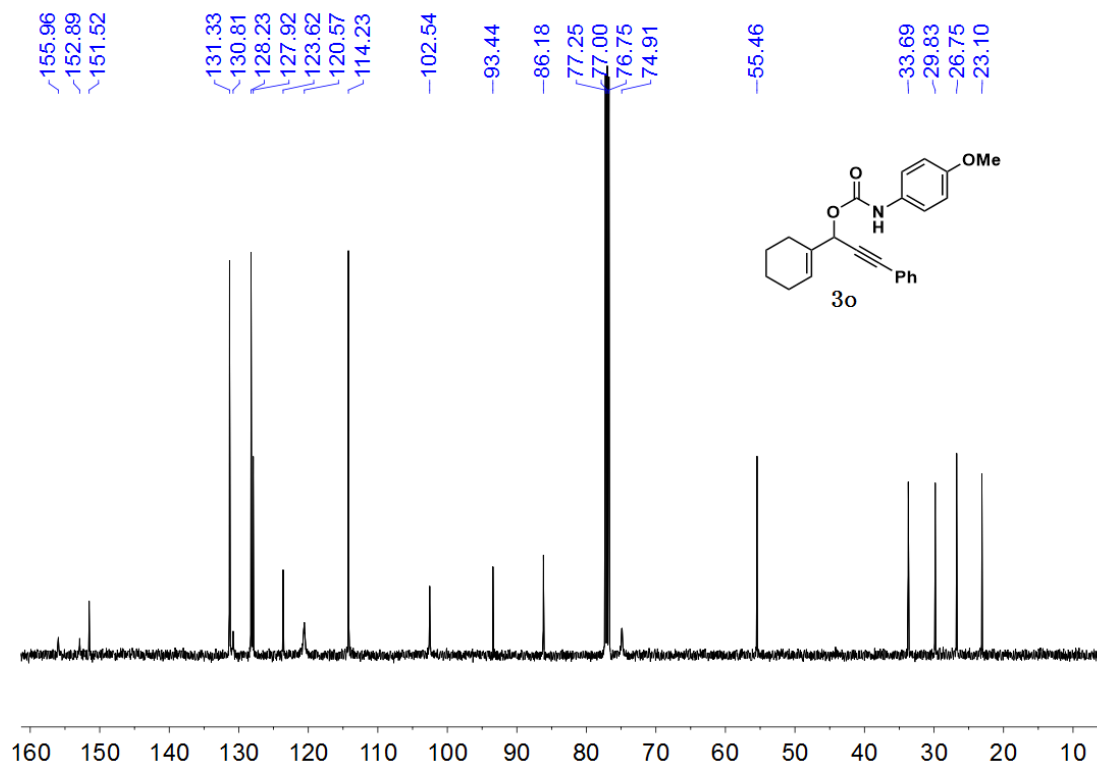

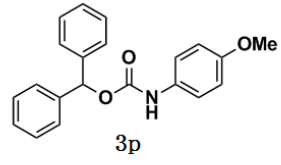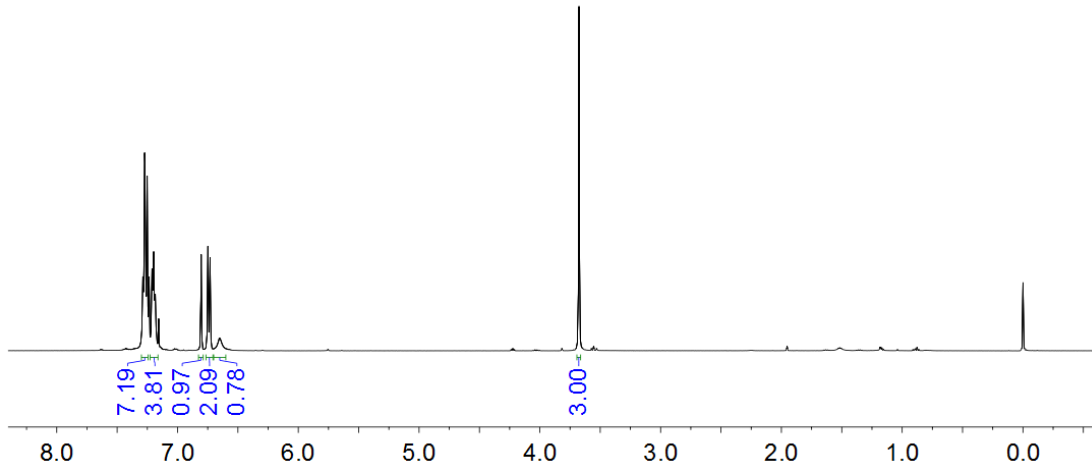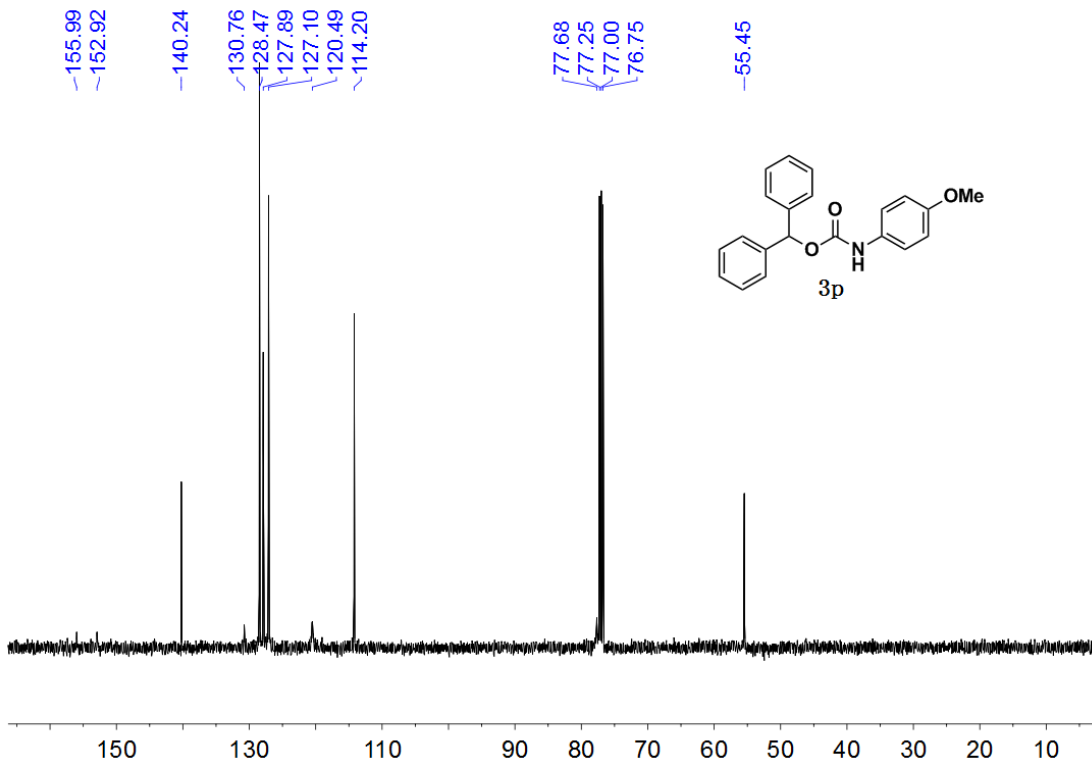



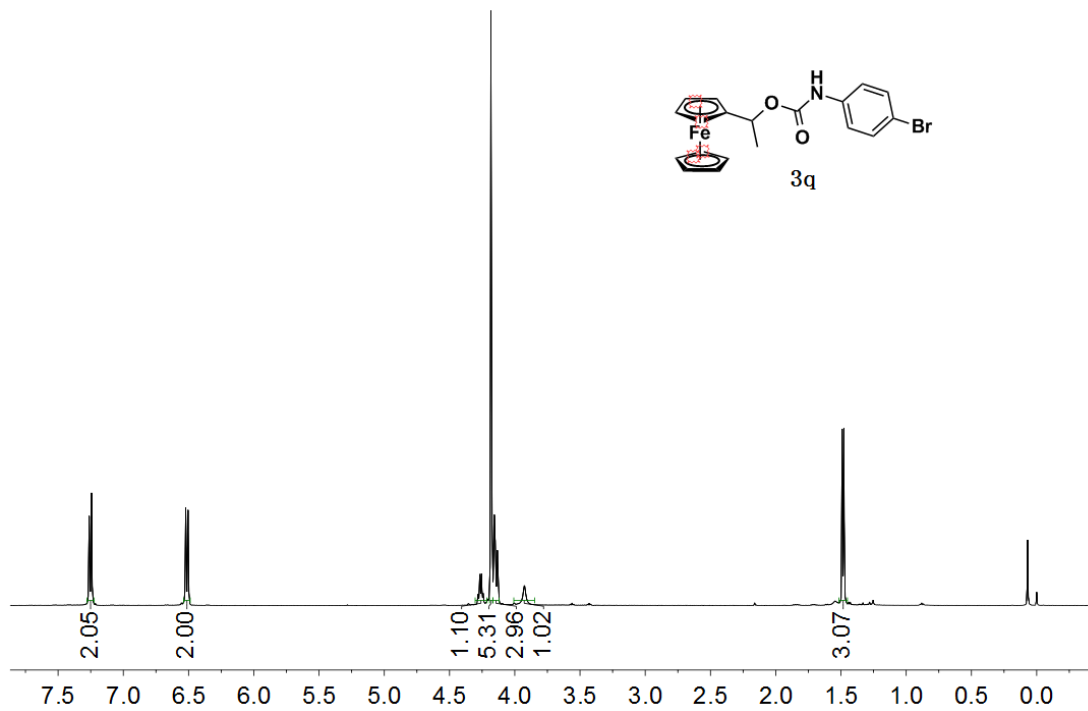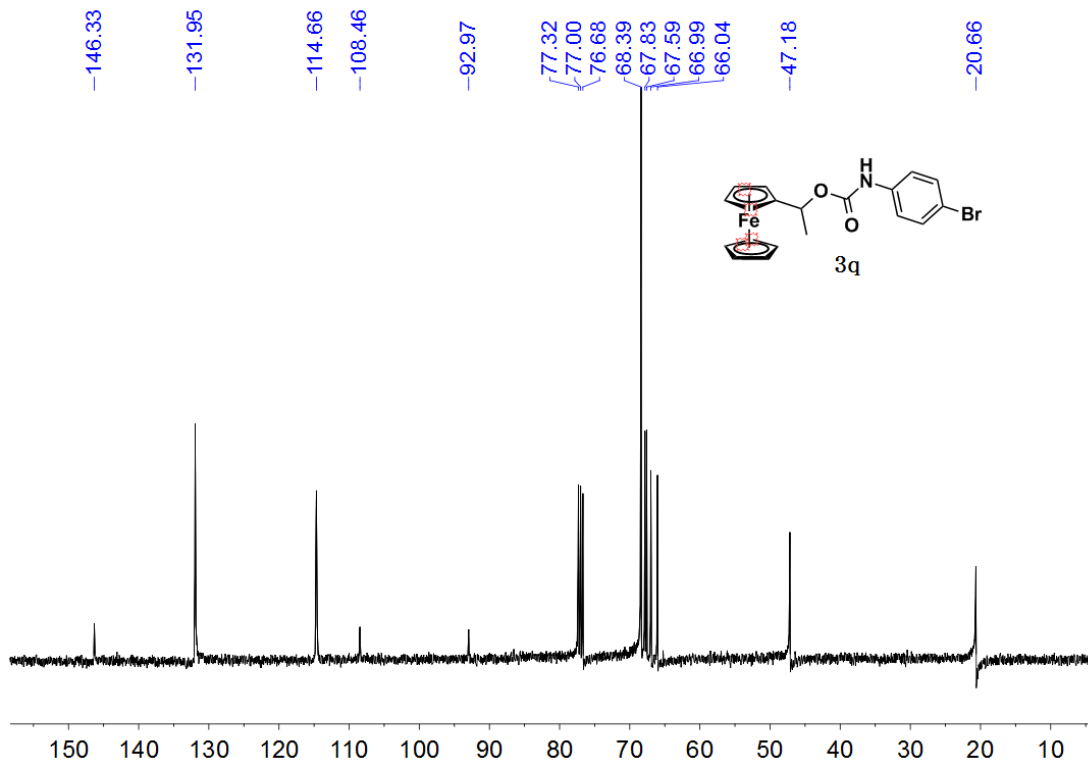

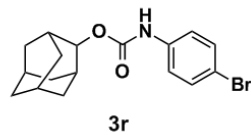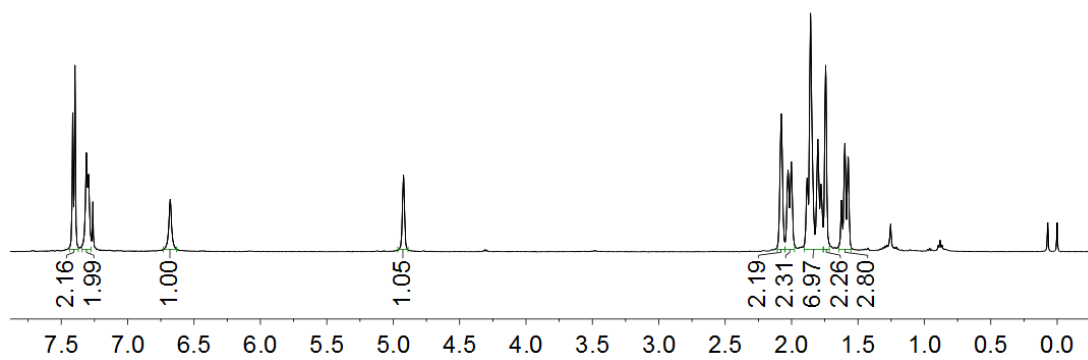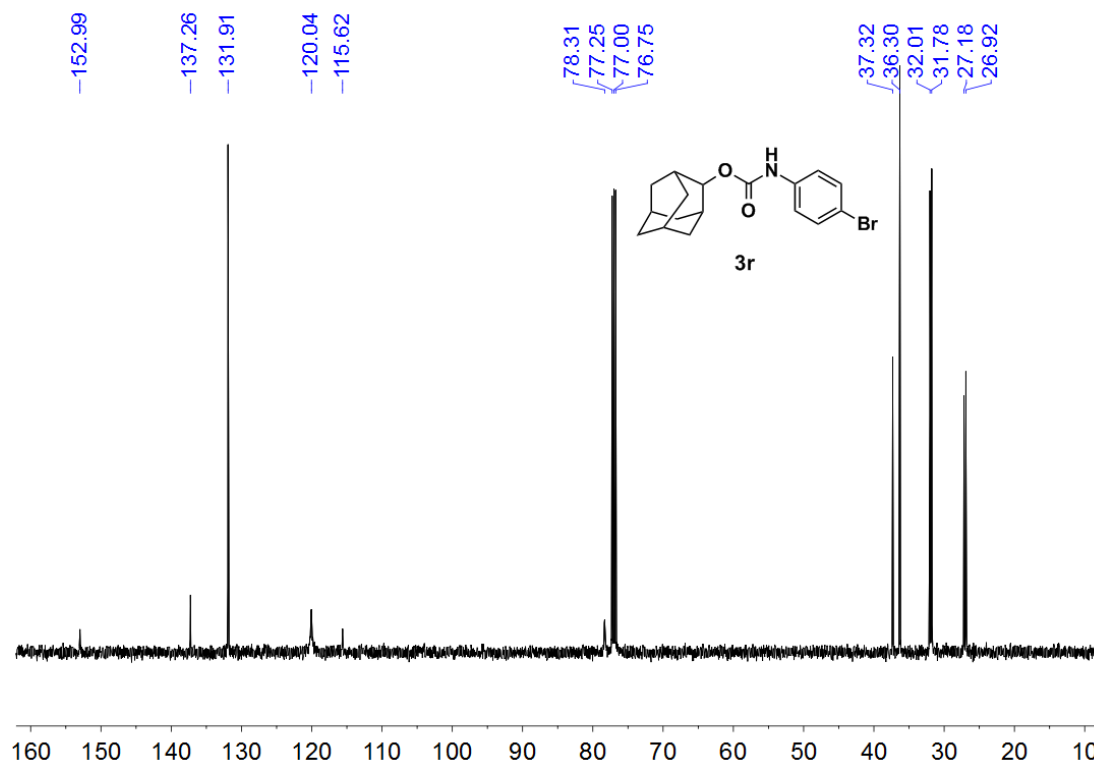

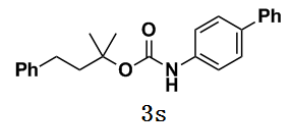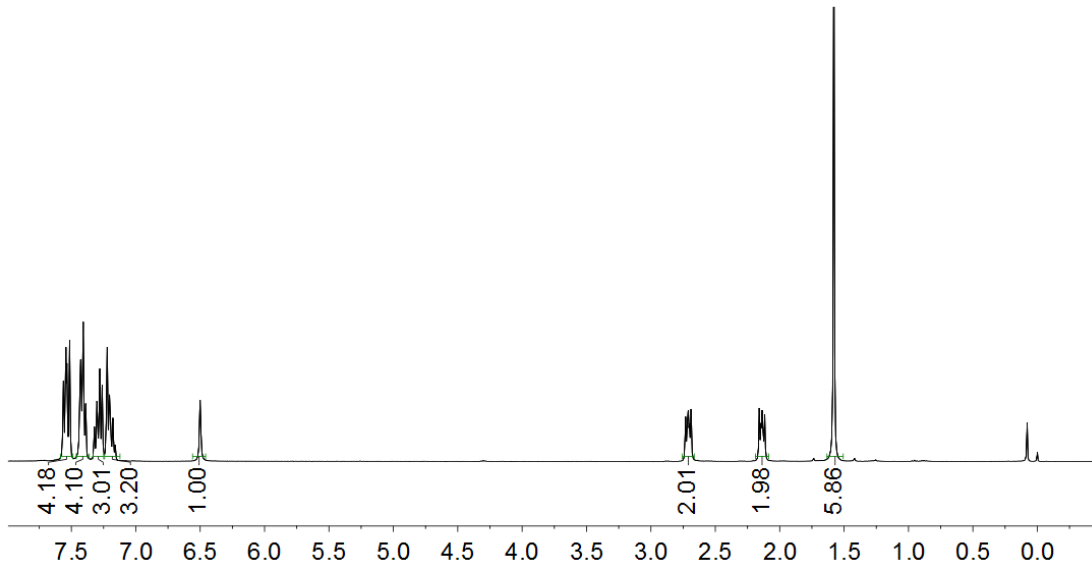

152.50  
 142.08  
 140.55  
 137.54  
 135.92  
 128.70  
 128.36  
 127.57  
 126.89  
 126.72  
 125.75  
 118.79

82.30  
 77.32  
 77.00  
 76.68

42.90

30.44  
 26.30

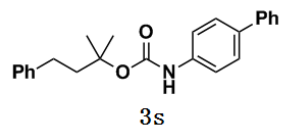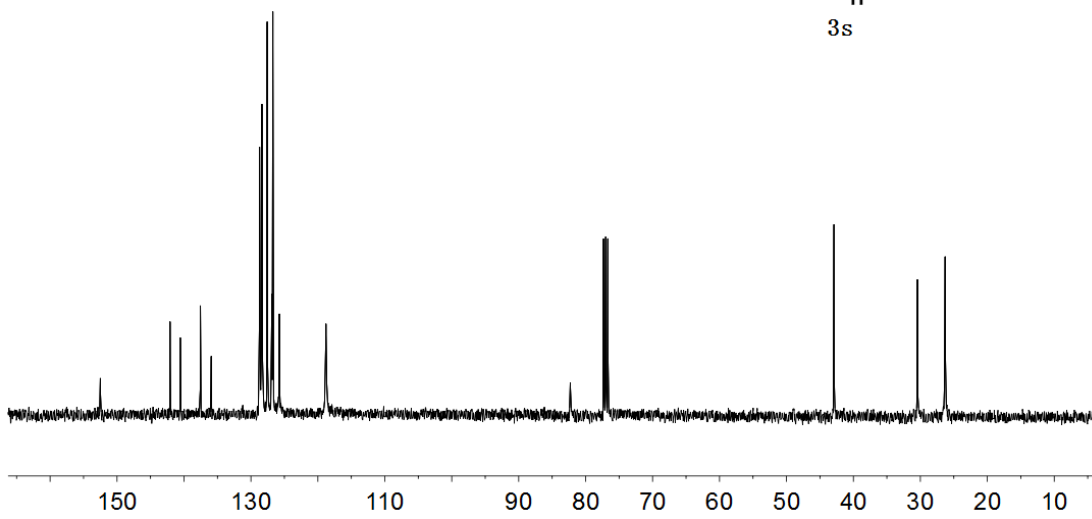

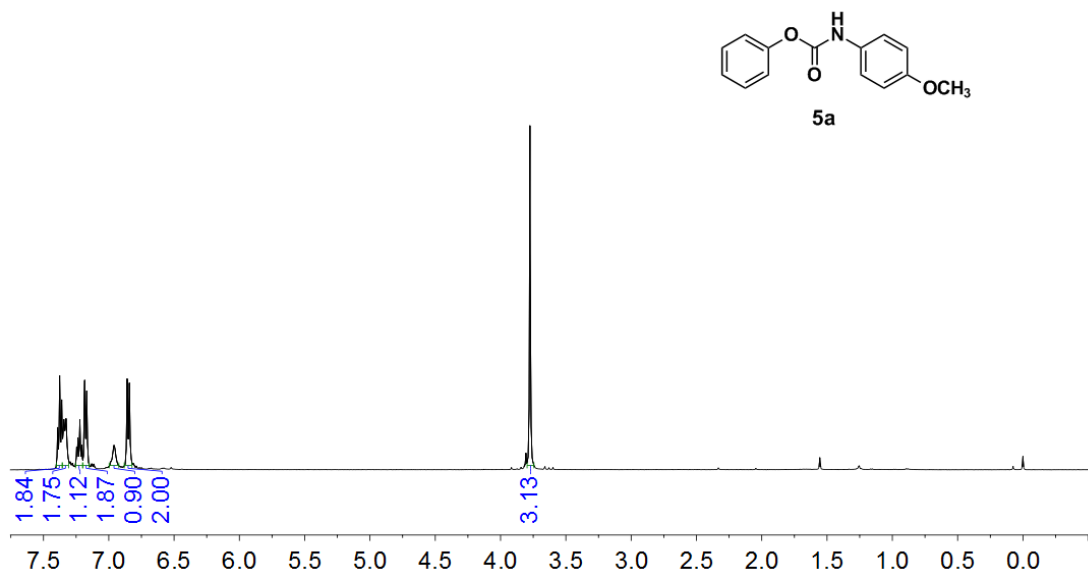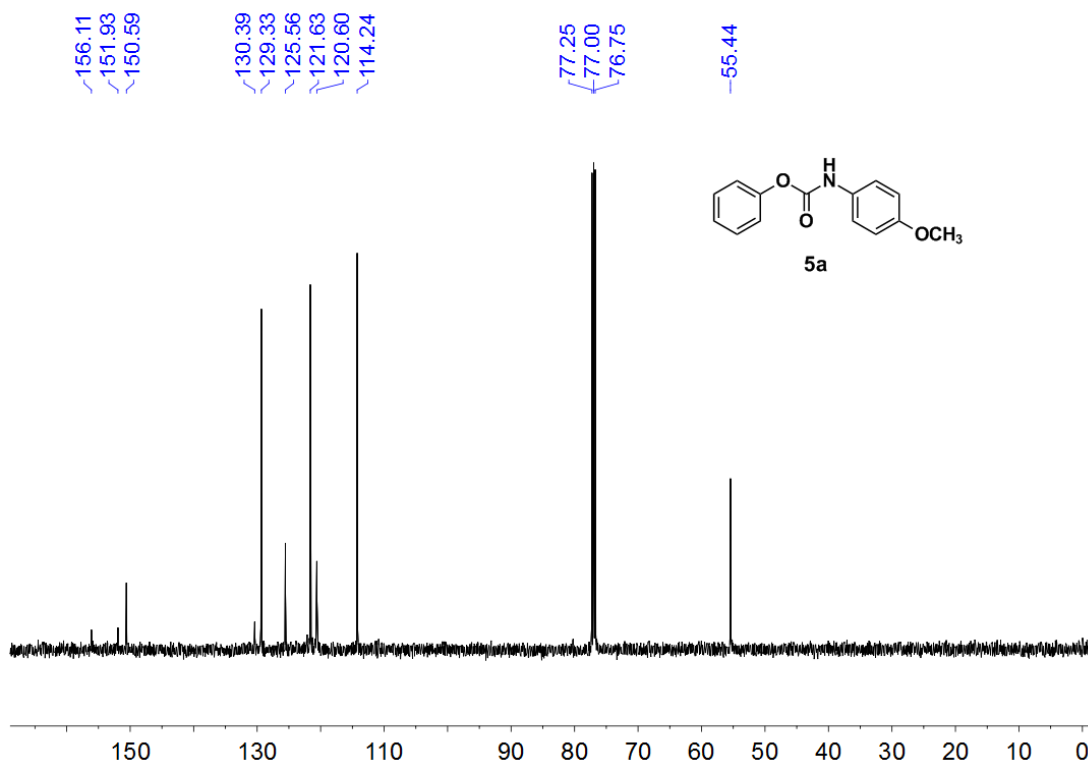

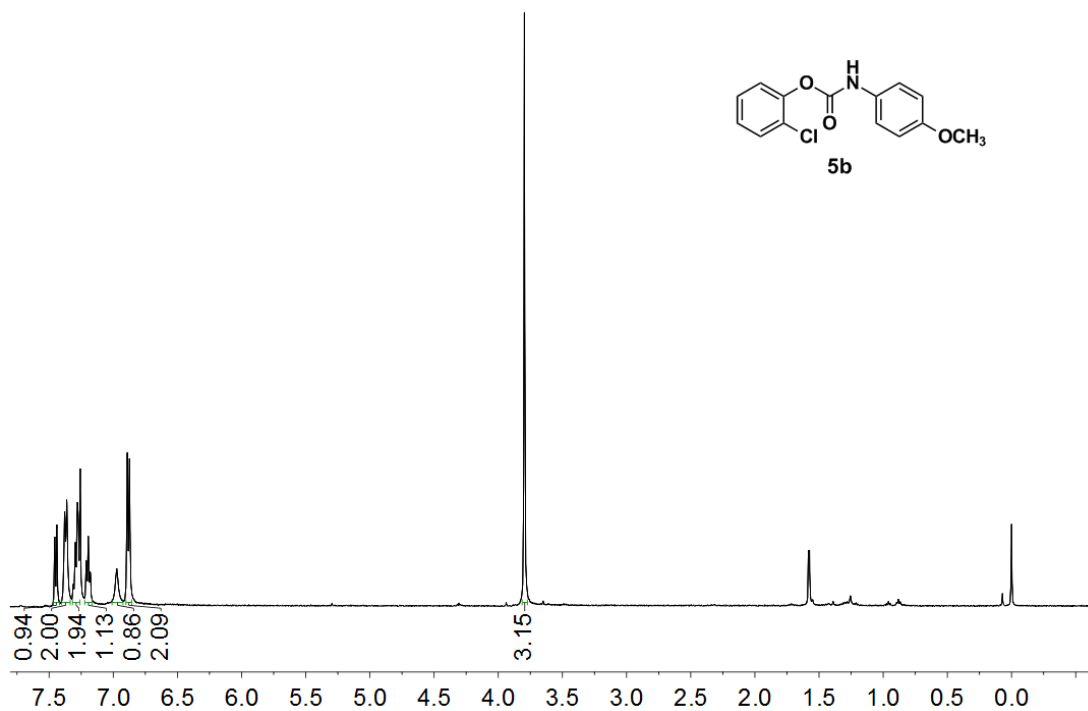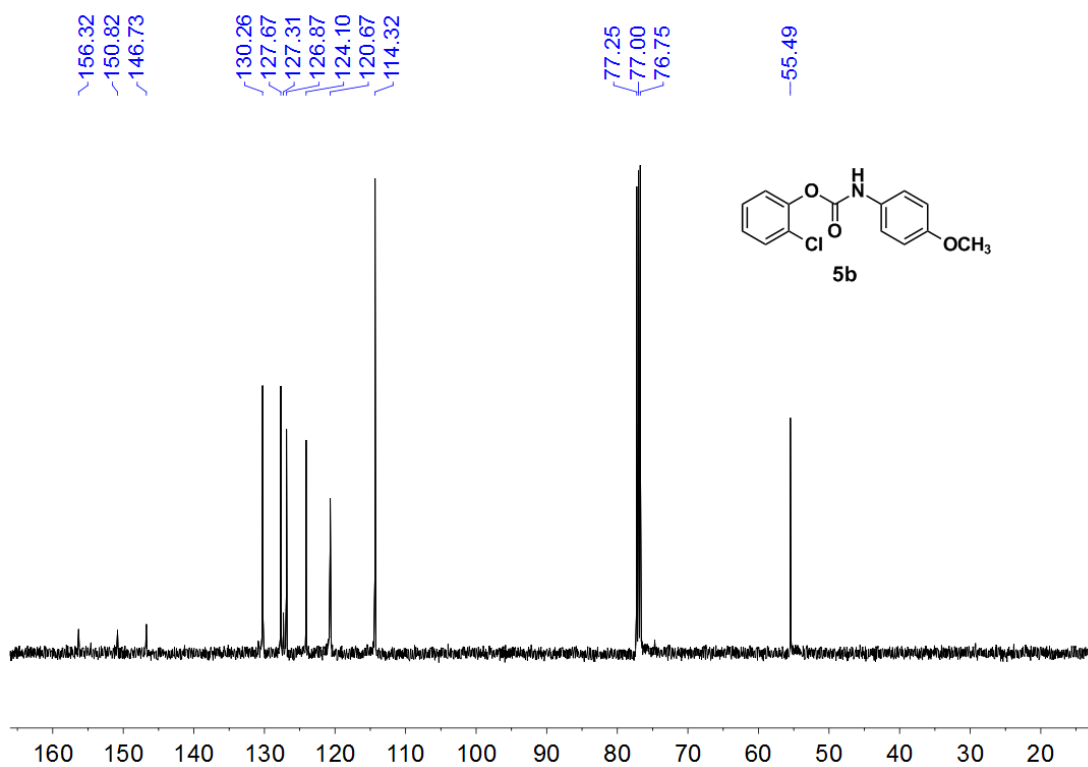

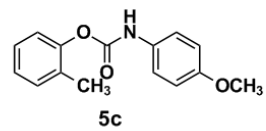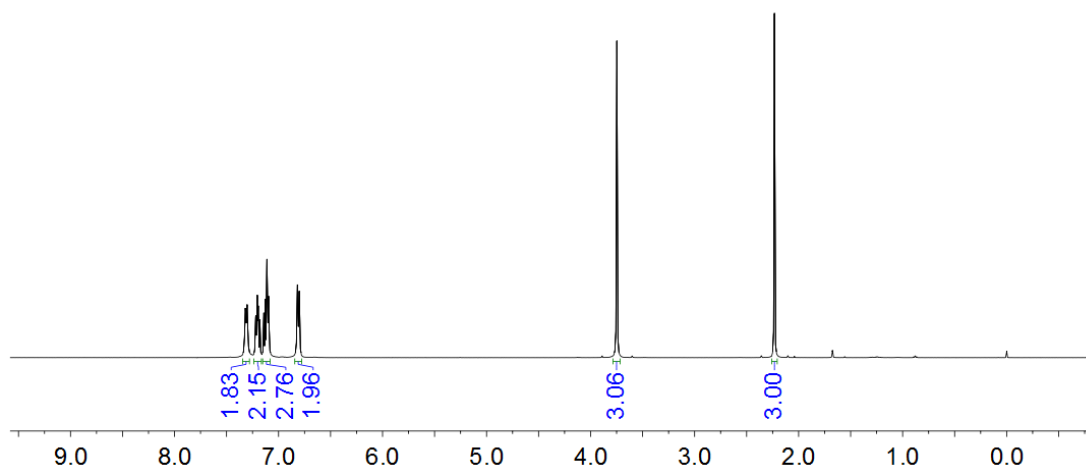

155.94, 151.78, 149.05, 131.03, 130.61, 130.54, 126.81, 125.83, 122.15, 120.41, 114.16, 77.25, 77.00, 76.75, 55.40, 16.08

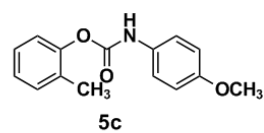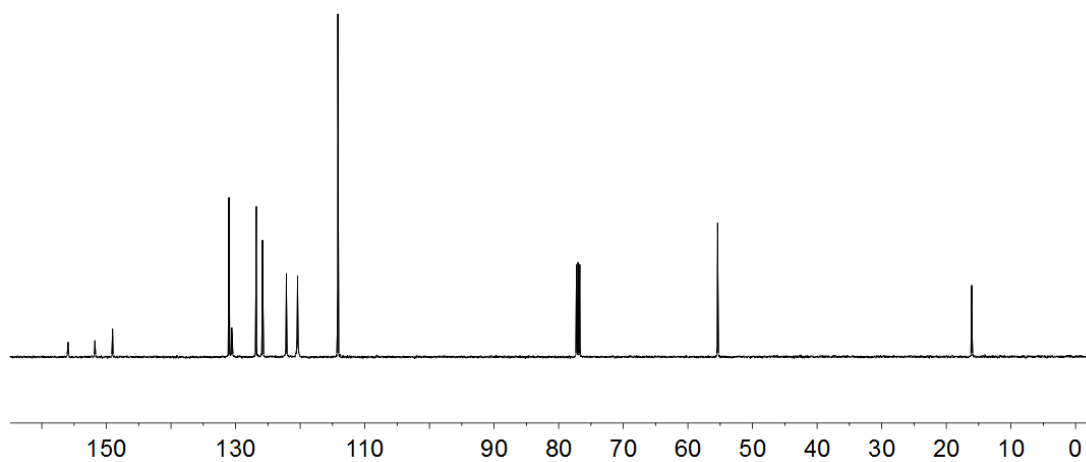

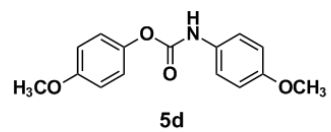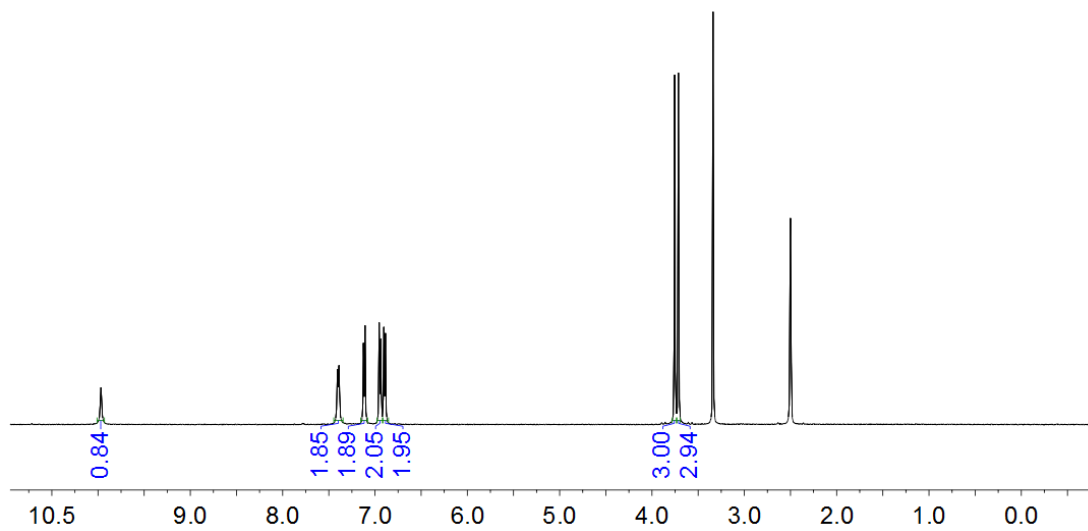

~157.08  
 ~155.55  
 ~152.73

~144.51

~132.22

~123.38

~120.45

~114.81

~114.56

55.91

55.68

40.50

40.33

40.17

40.00

39.83

39.67

39.50

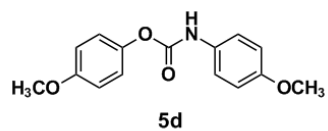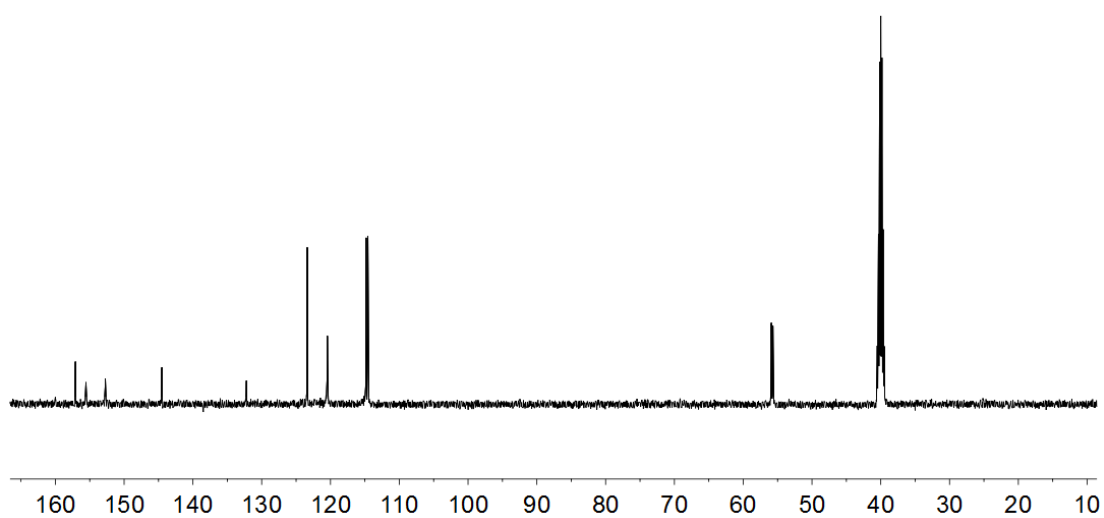

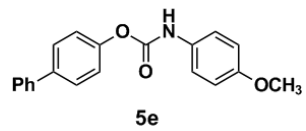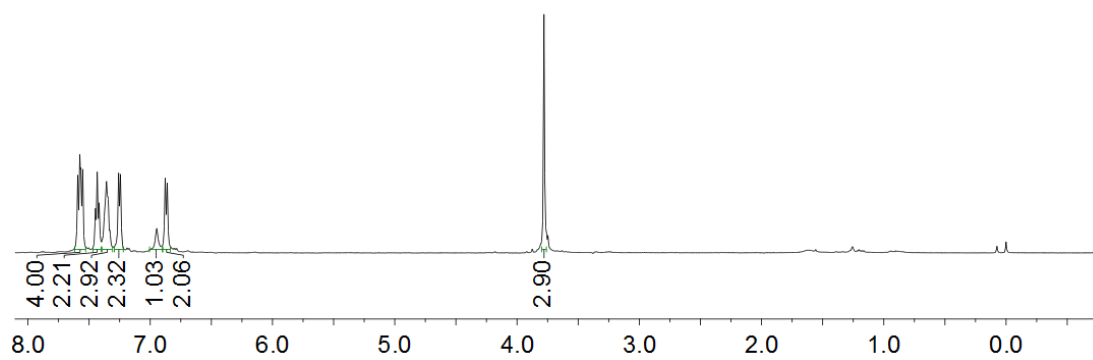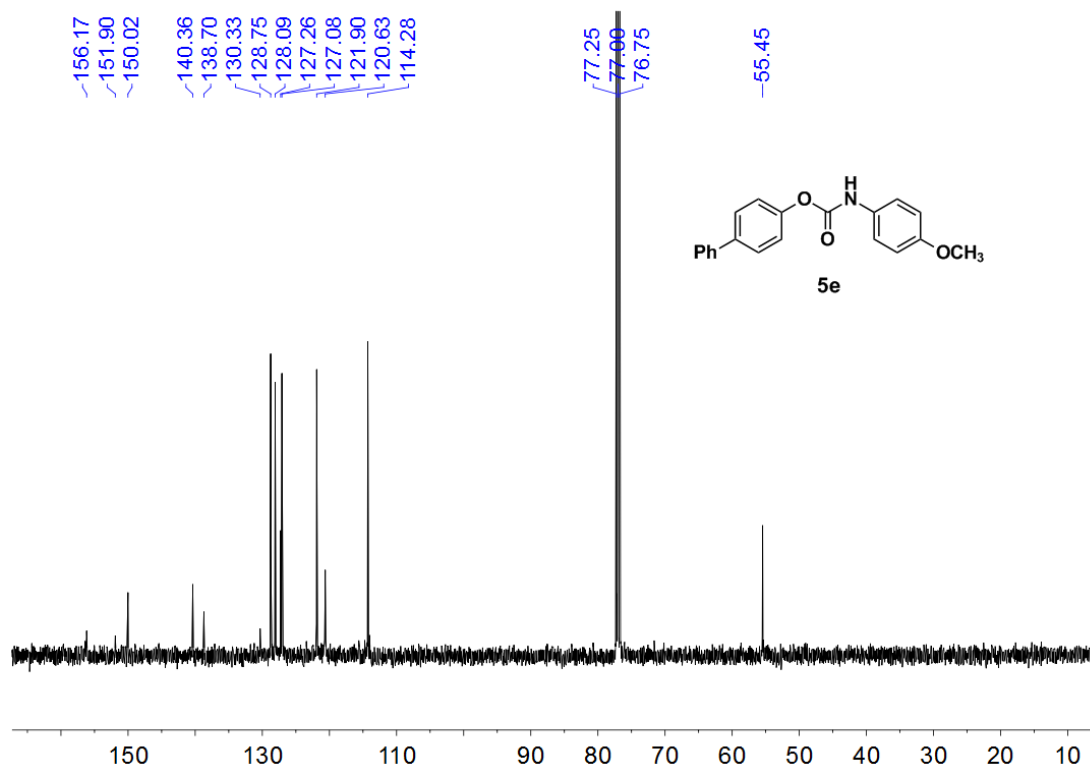



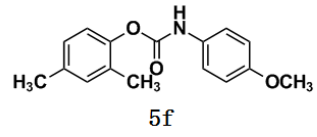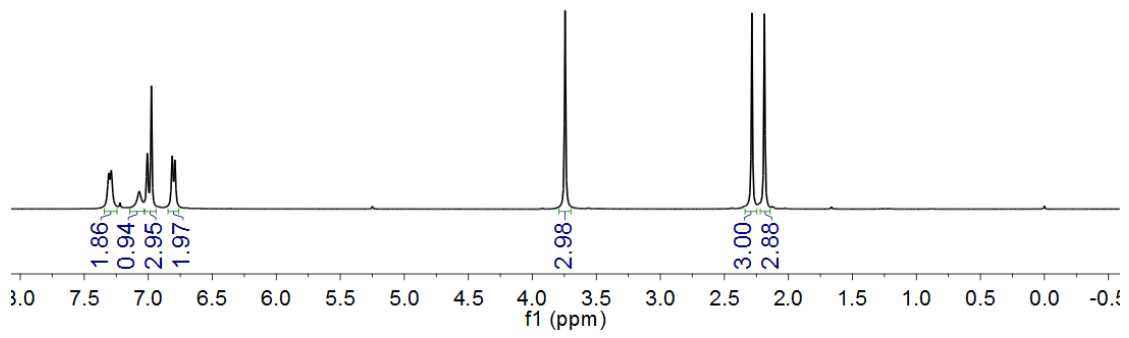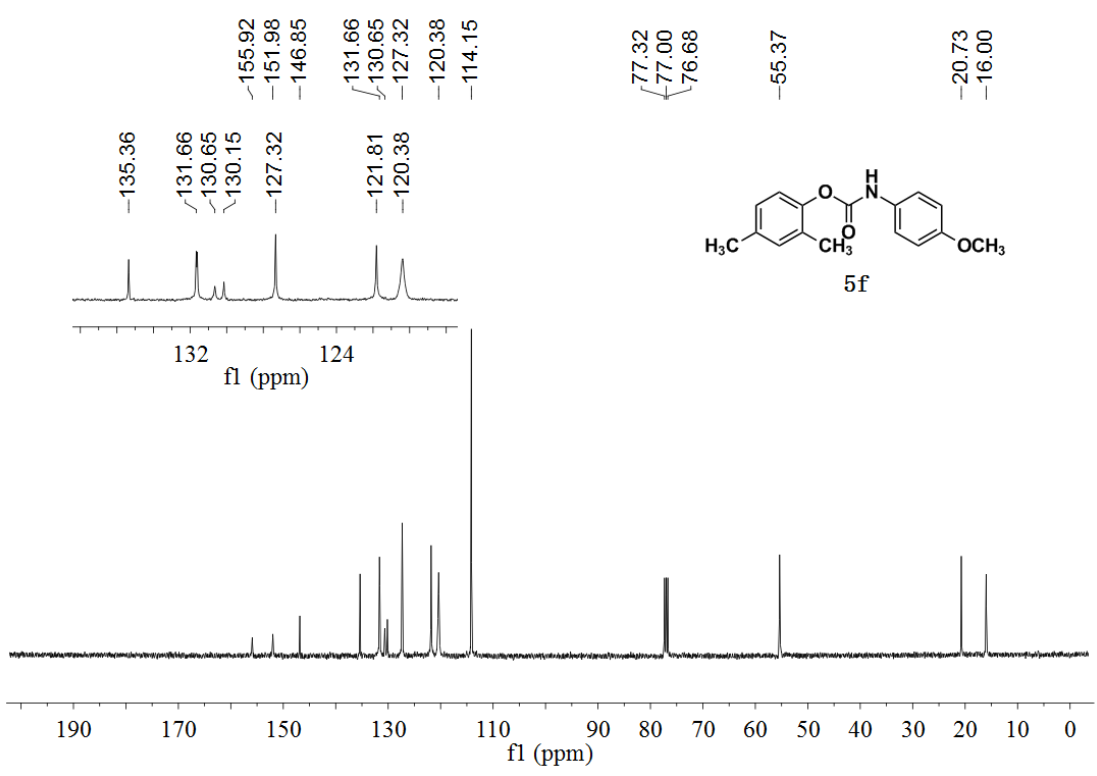

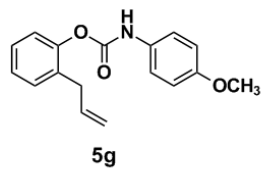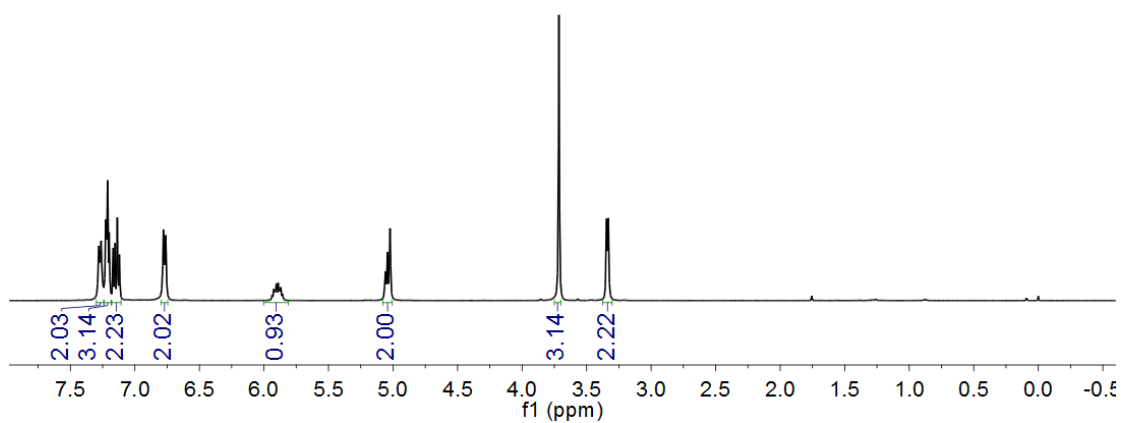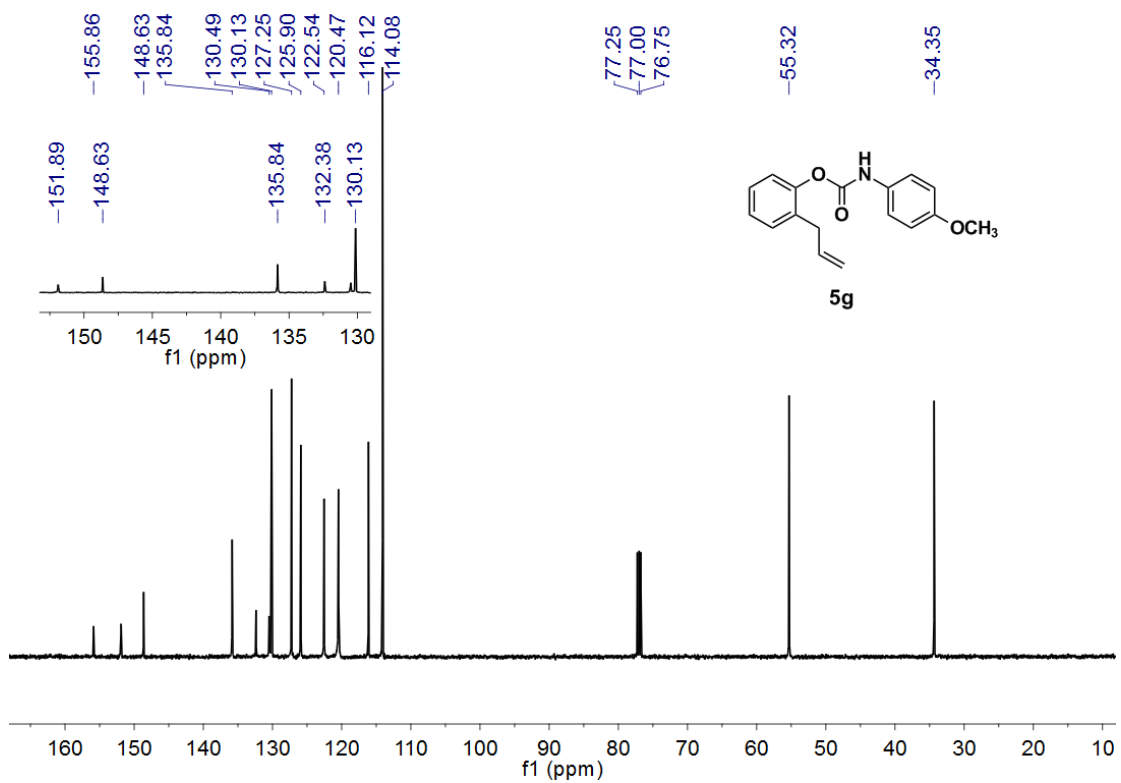

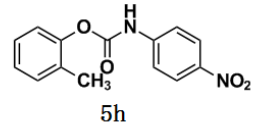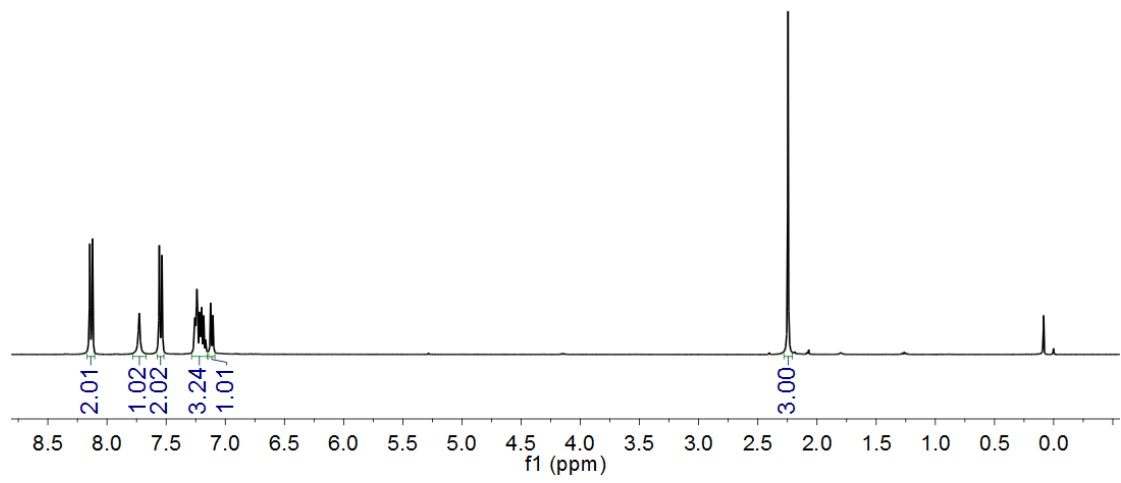

- 151.17
- 148.52
- 143.13
- 131.29
- 127.06
- 126.48
- 125.09
- 121.86
- 118.01
- 77.32
- 77.00
- 76.68
- 16.01

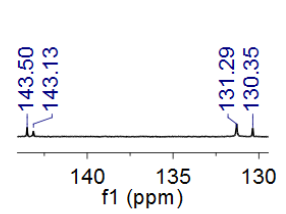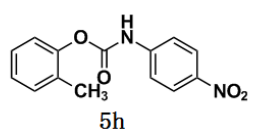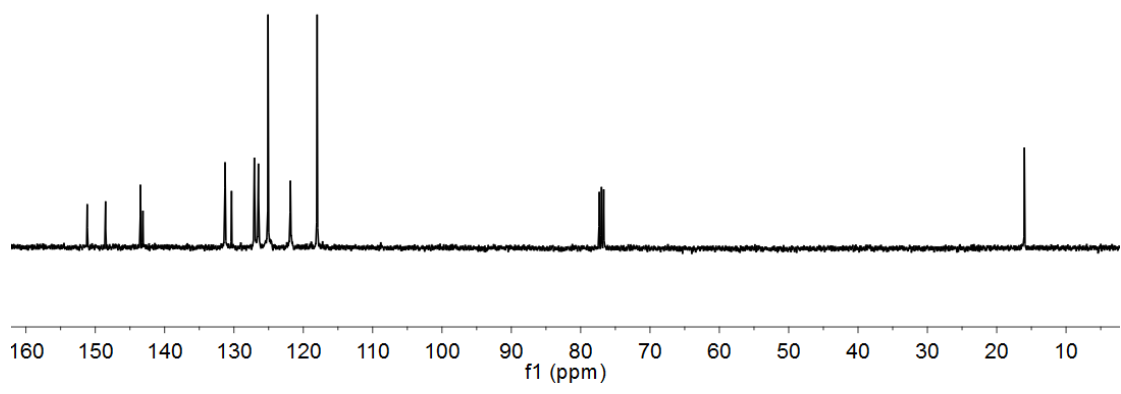

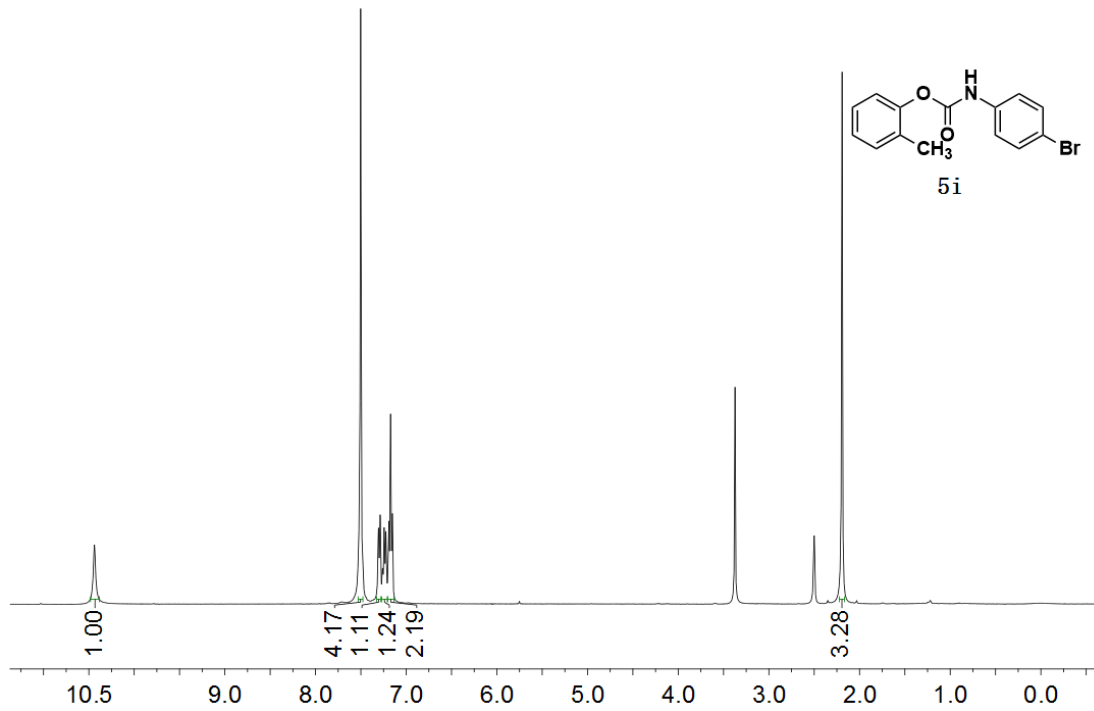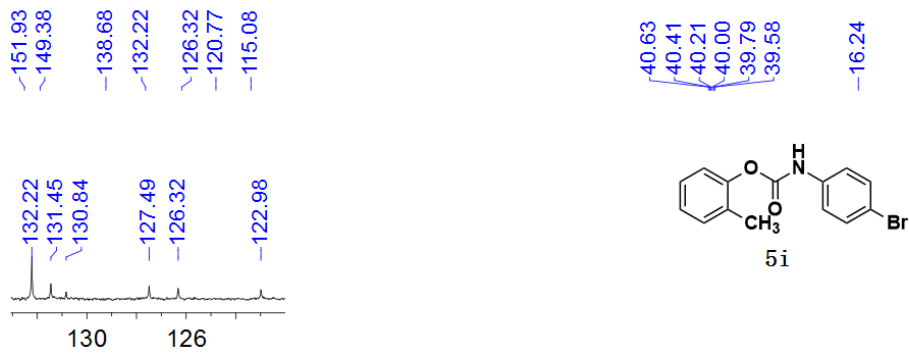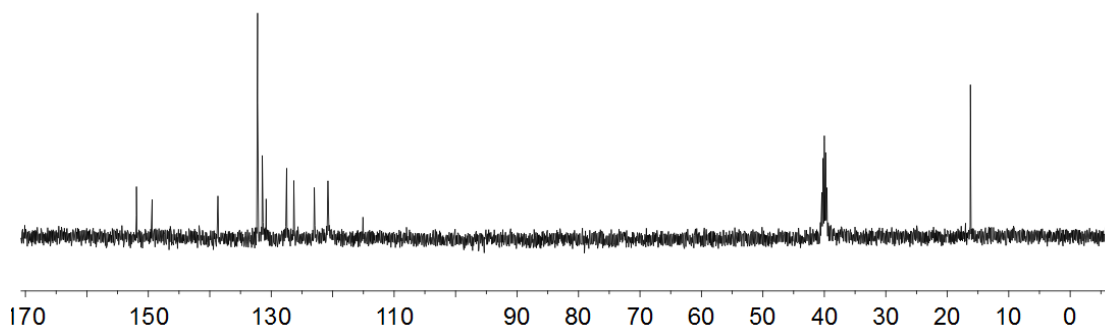

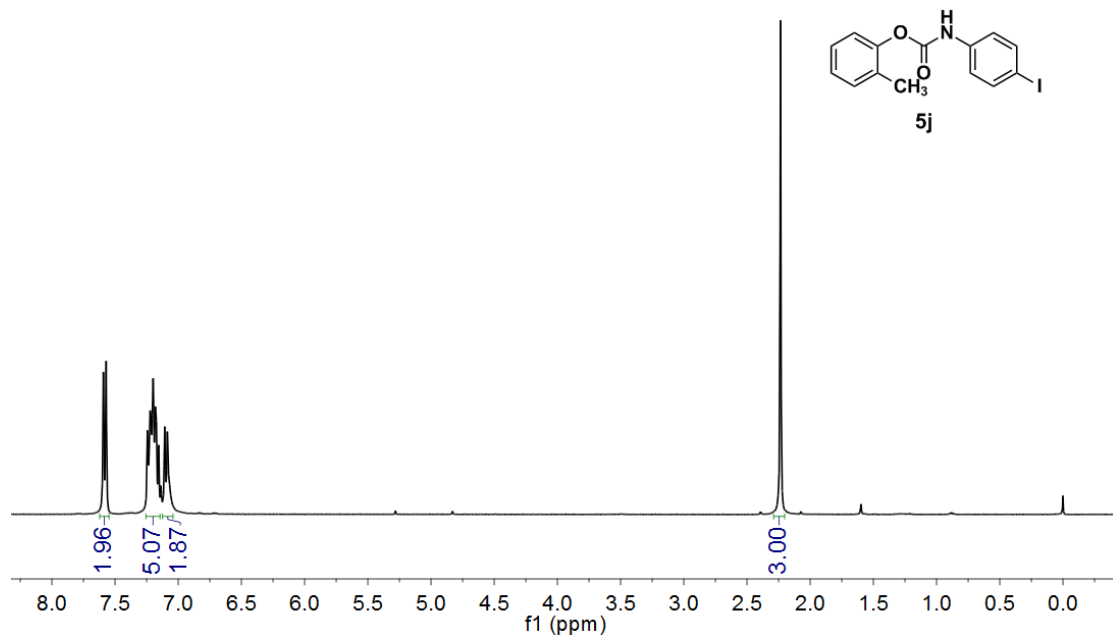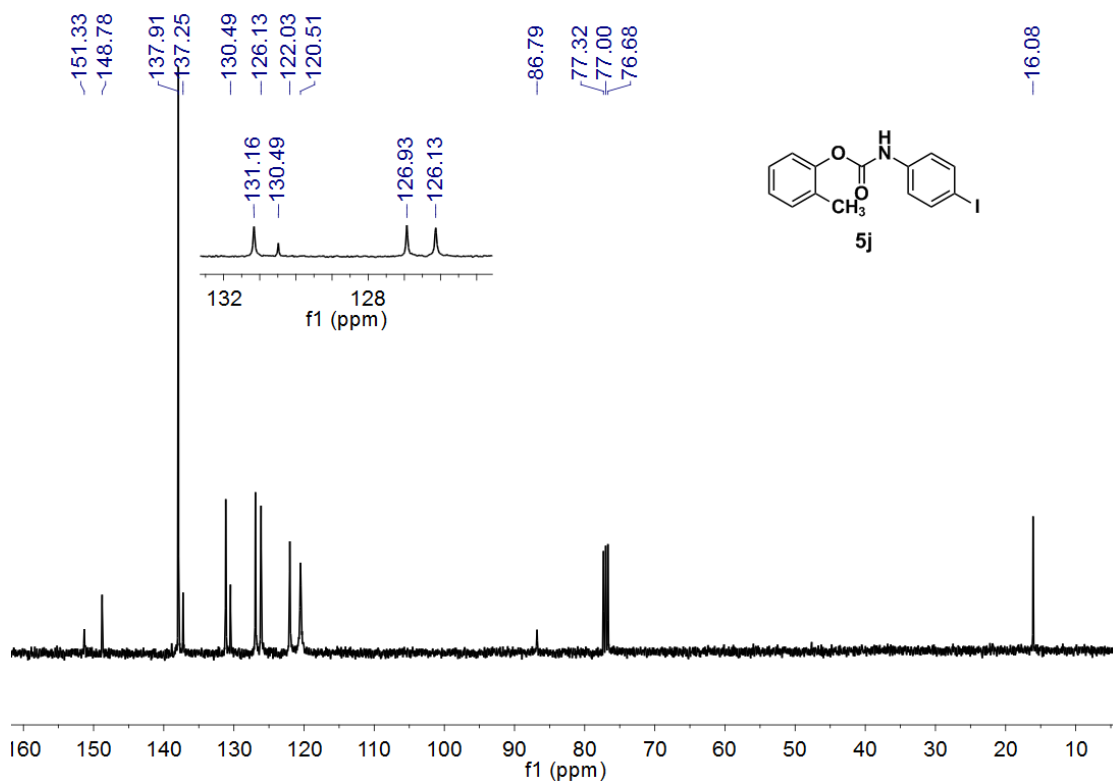

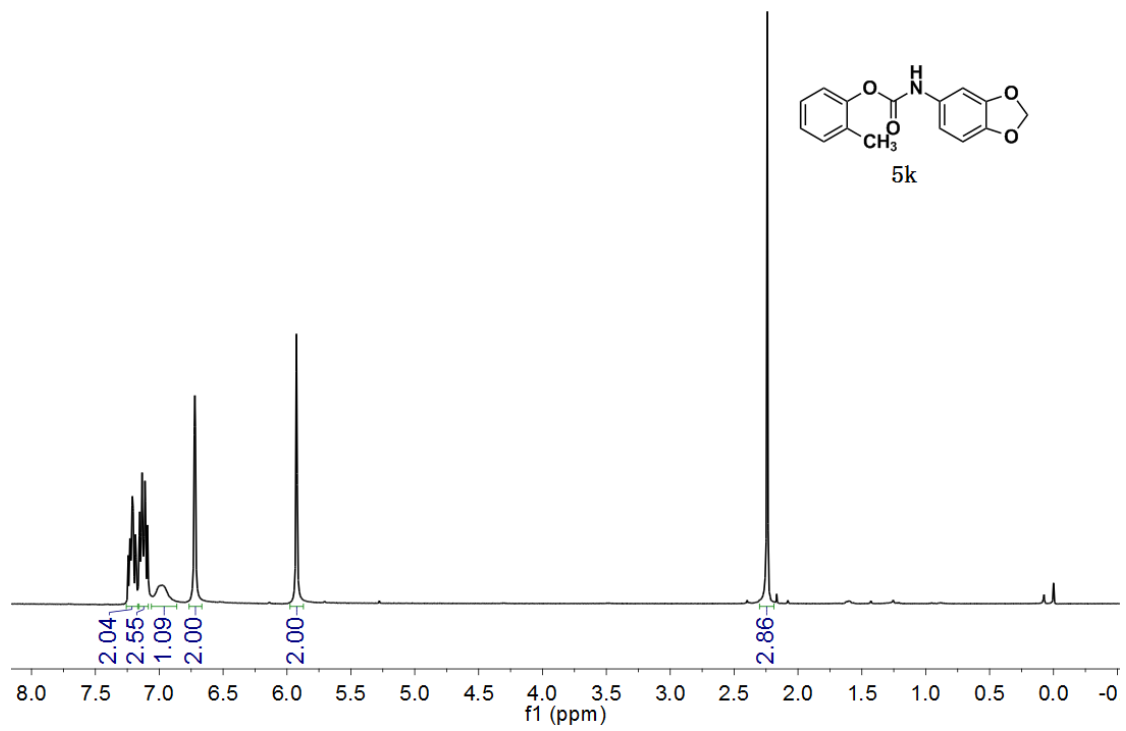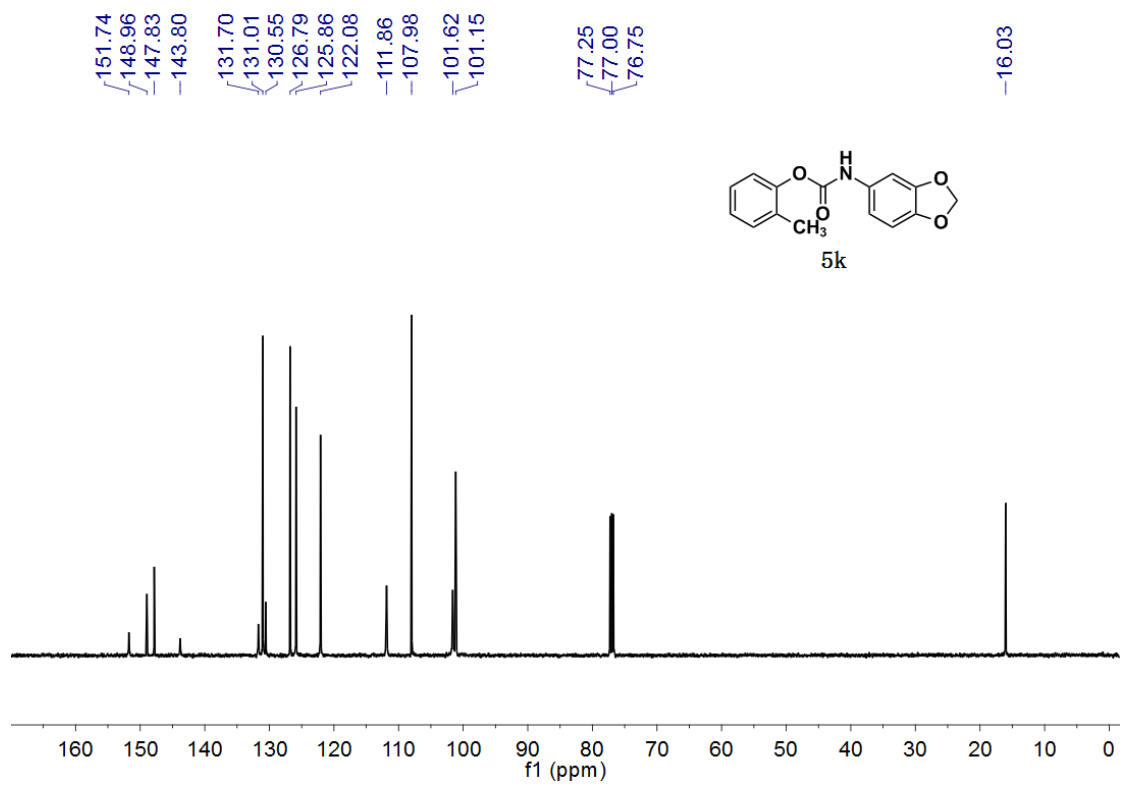

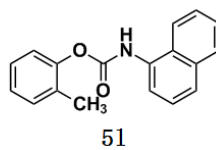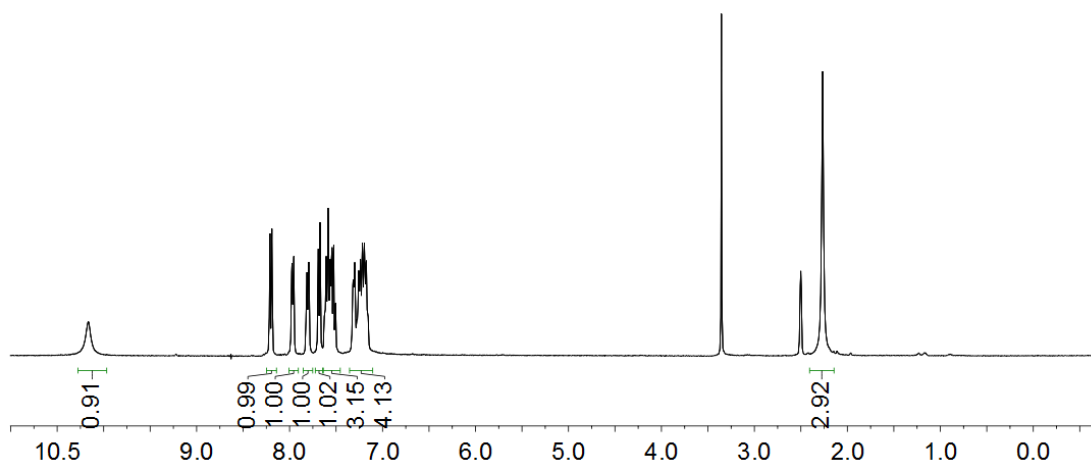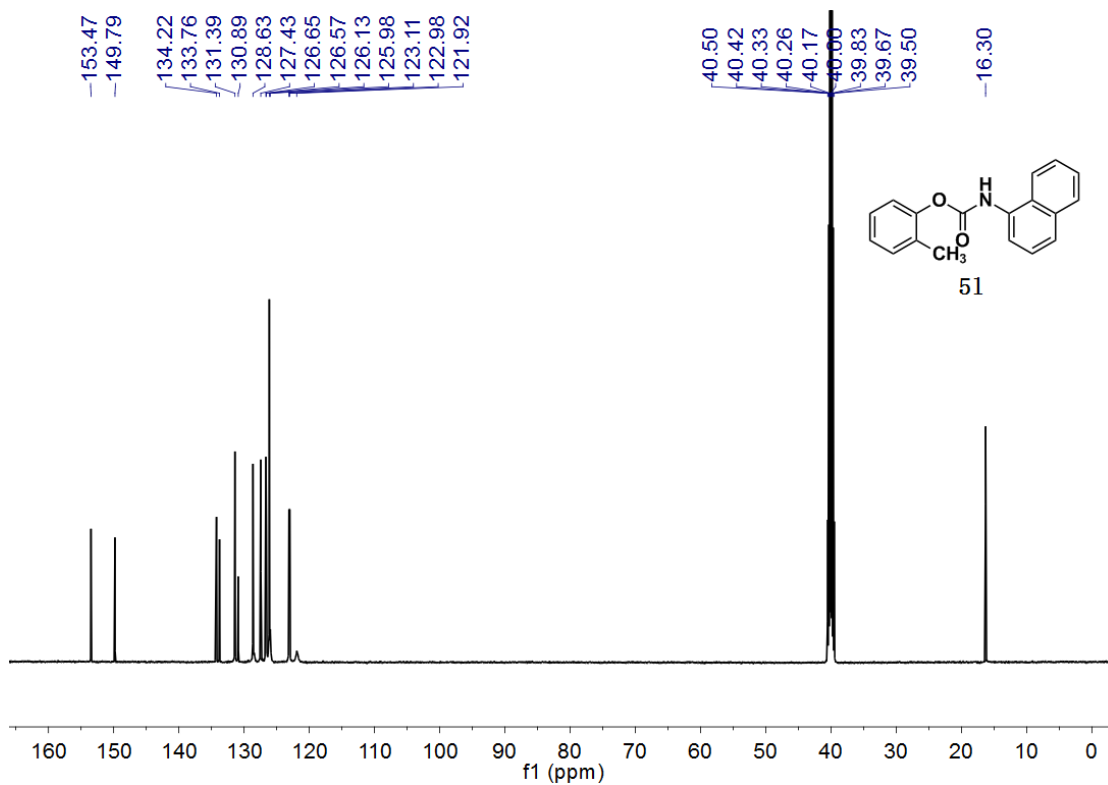

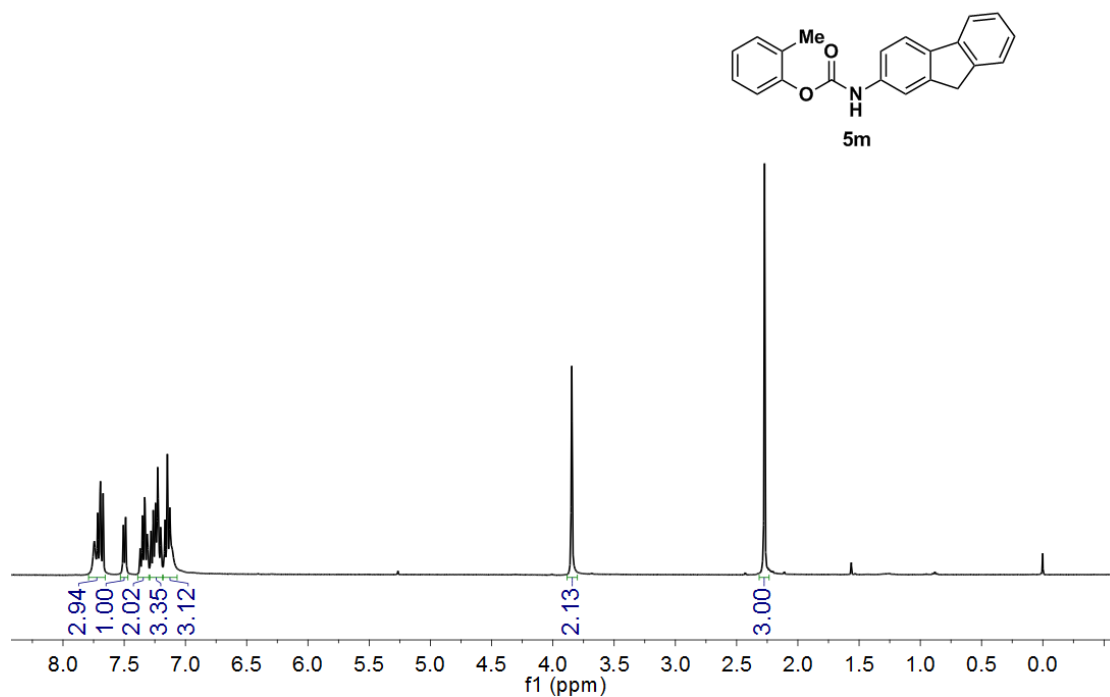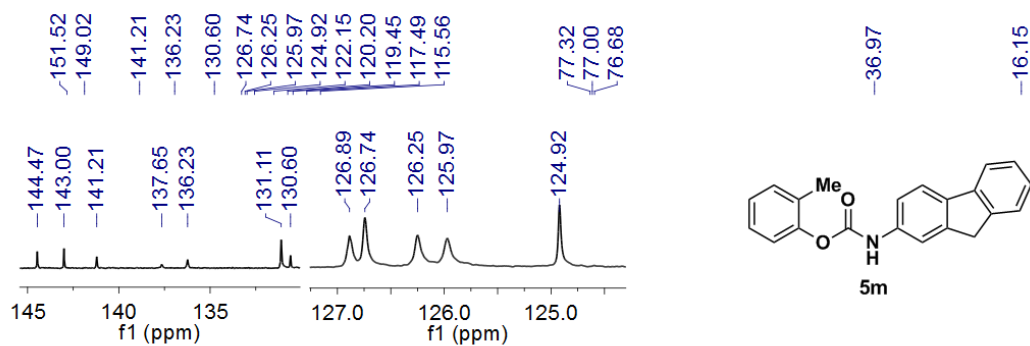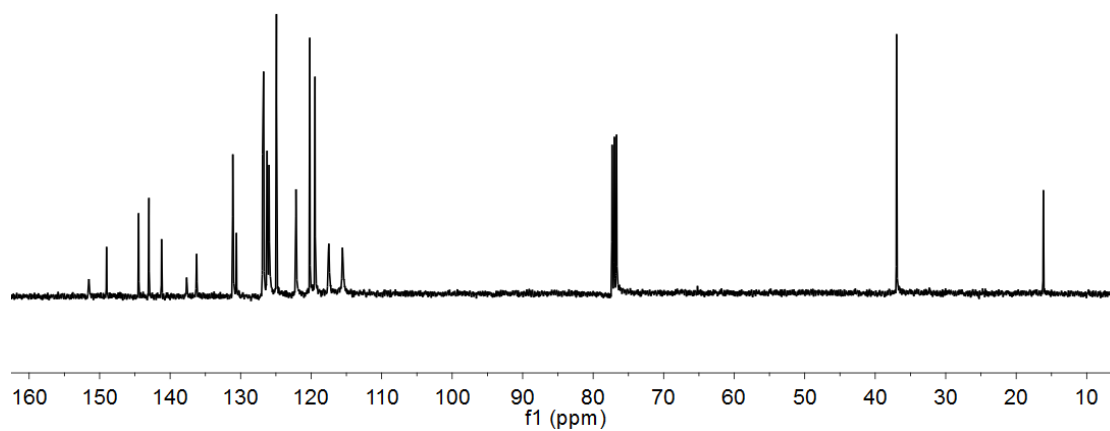



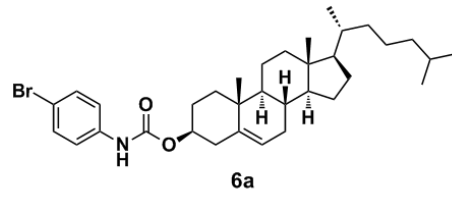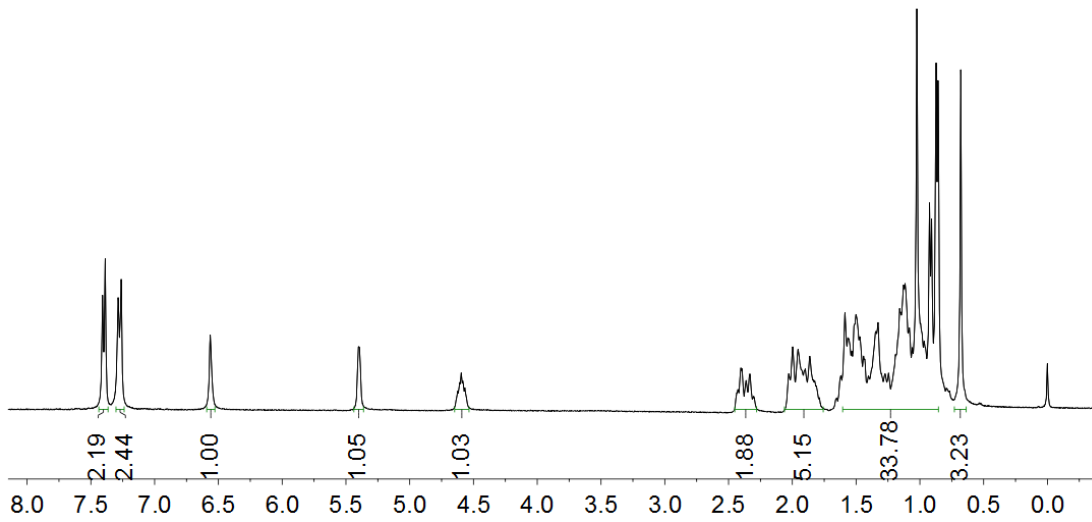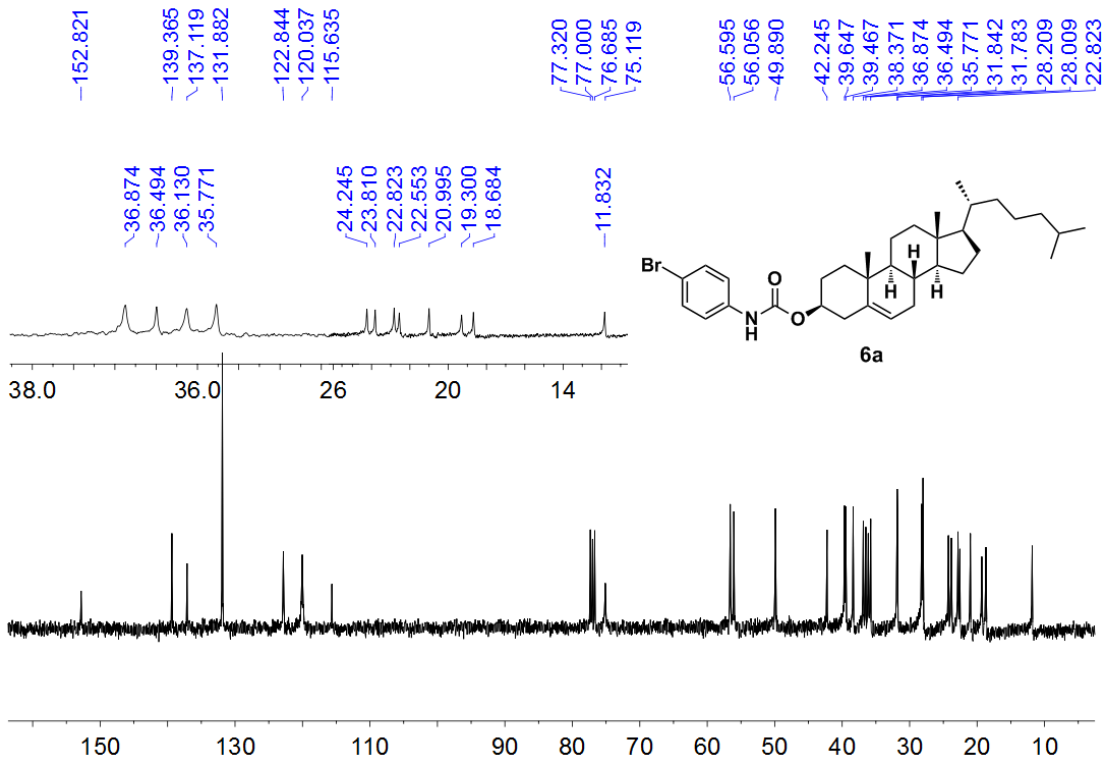

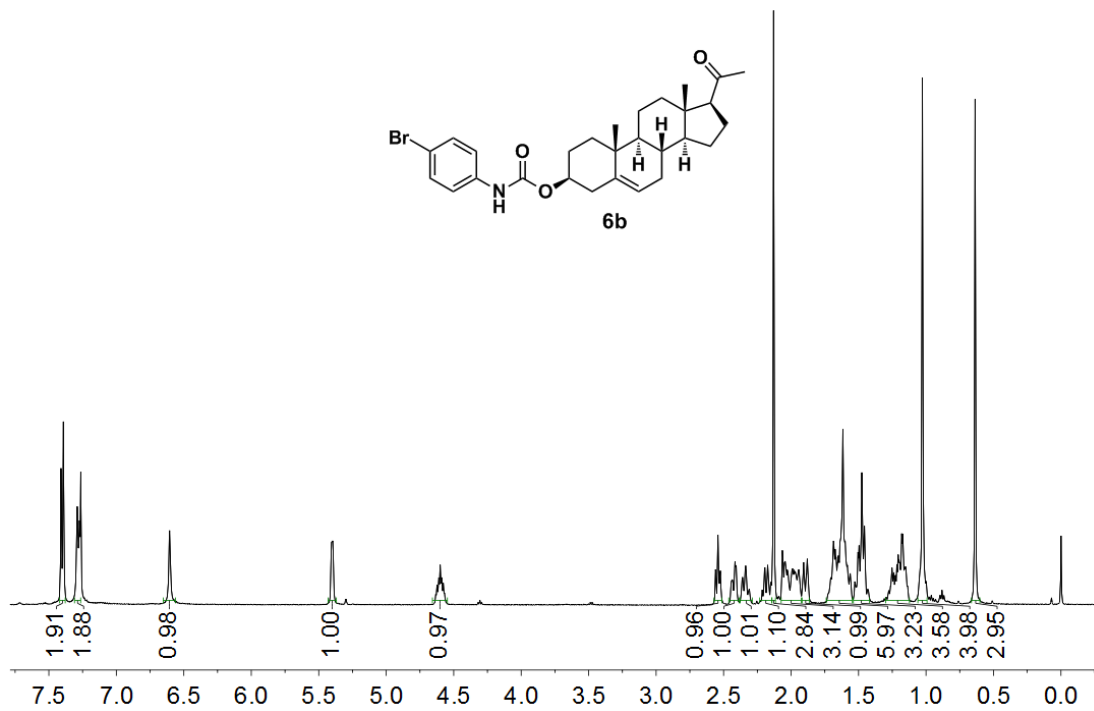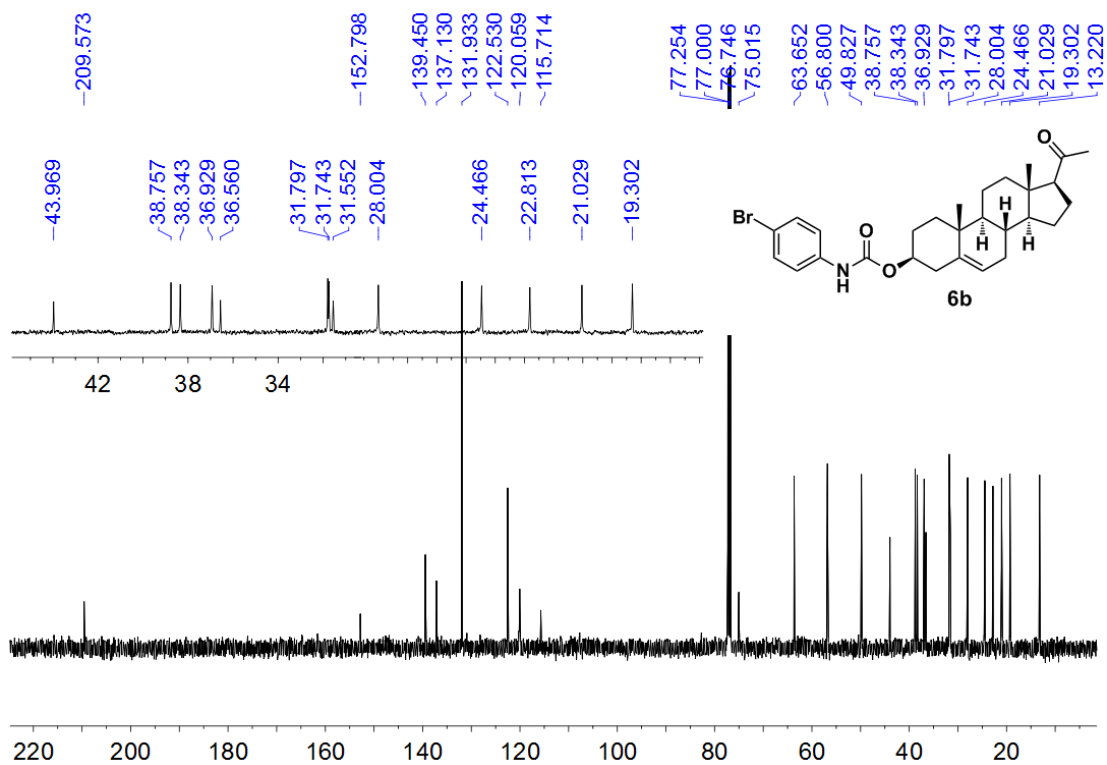

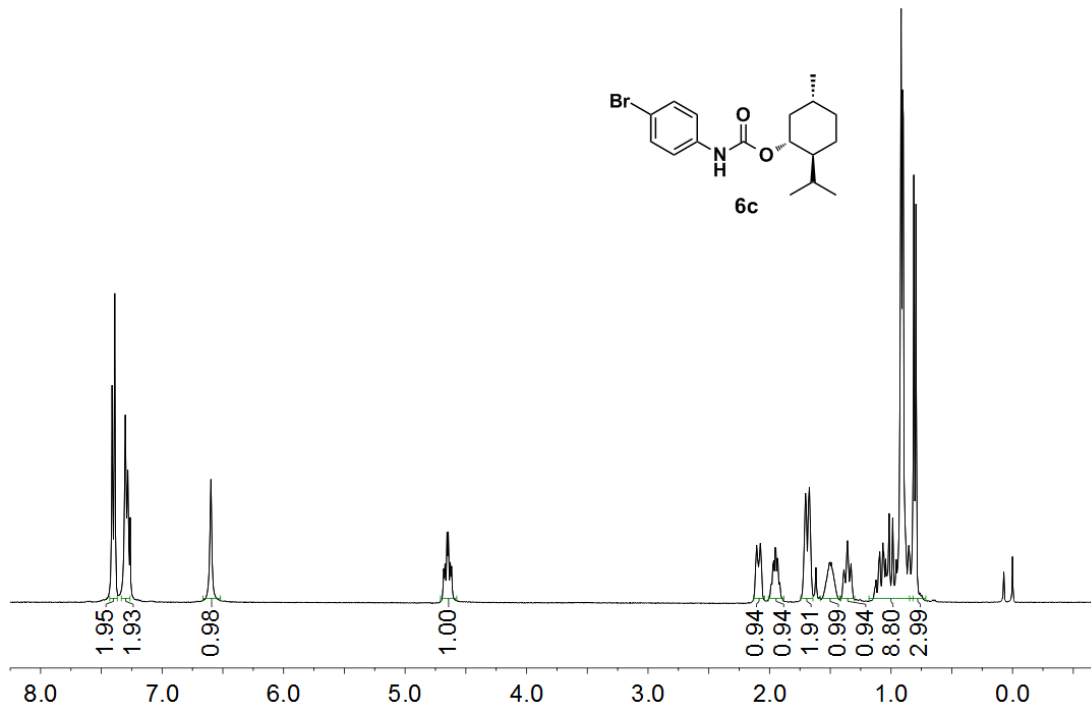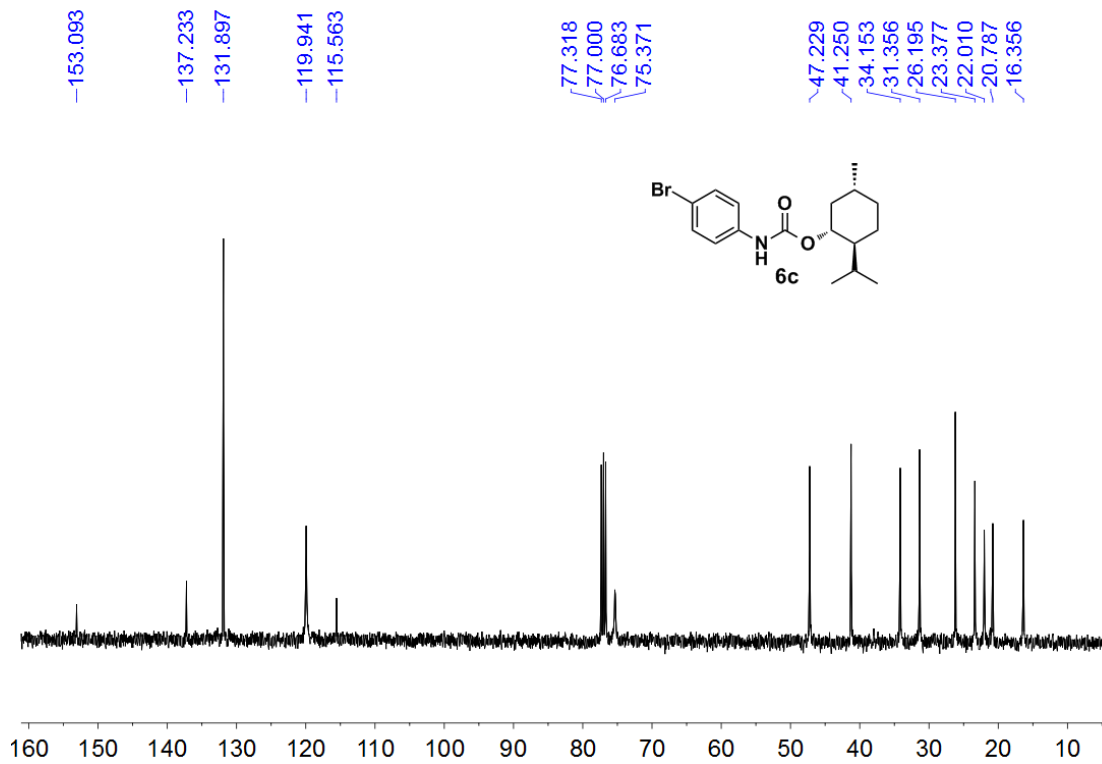

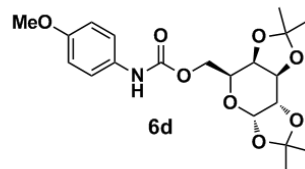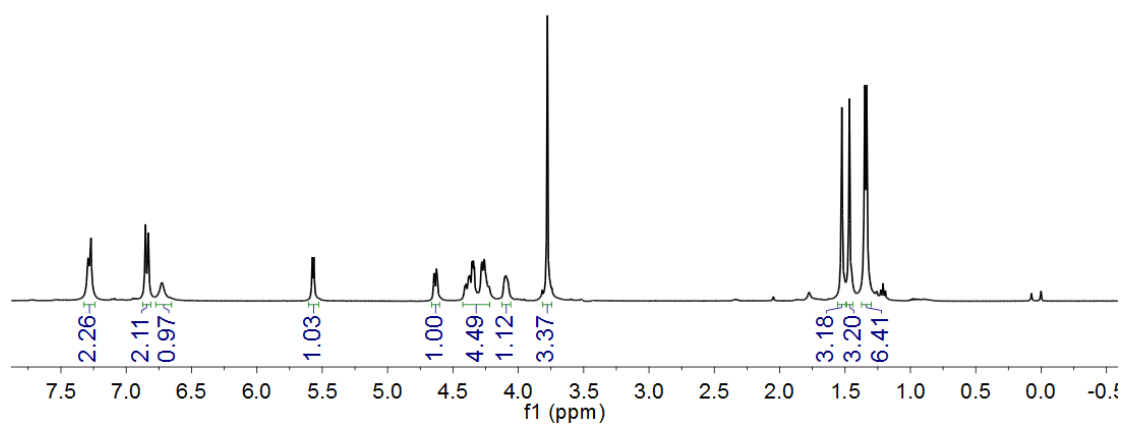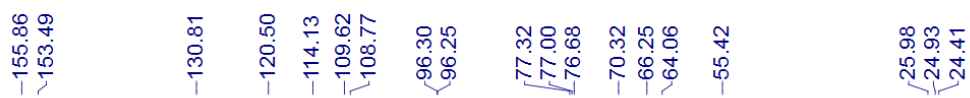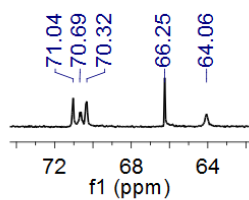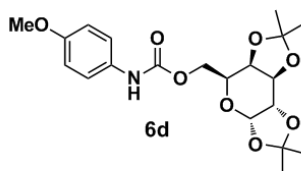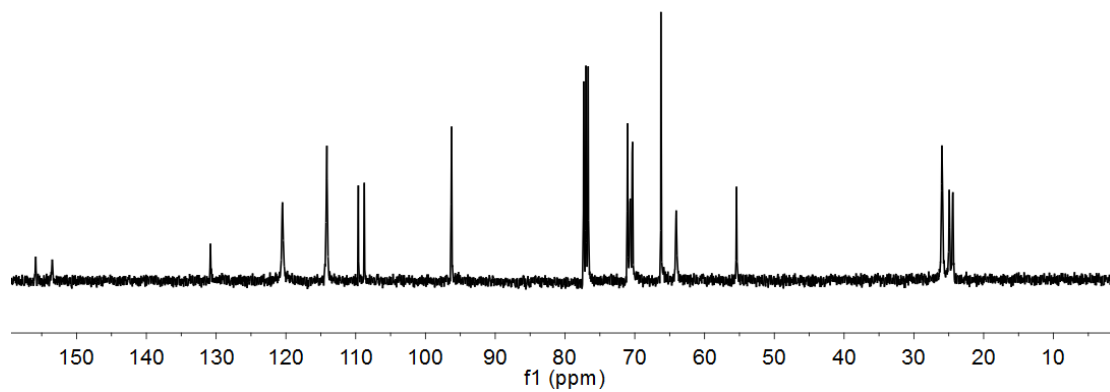

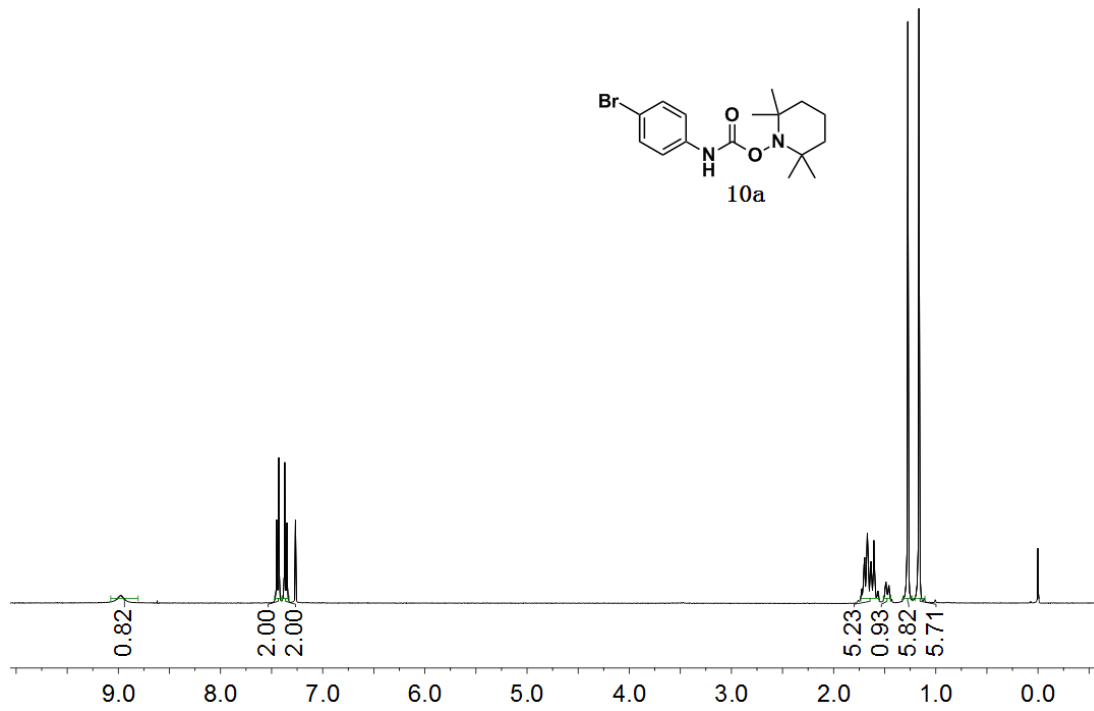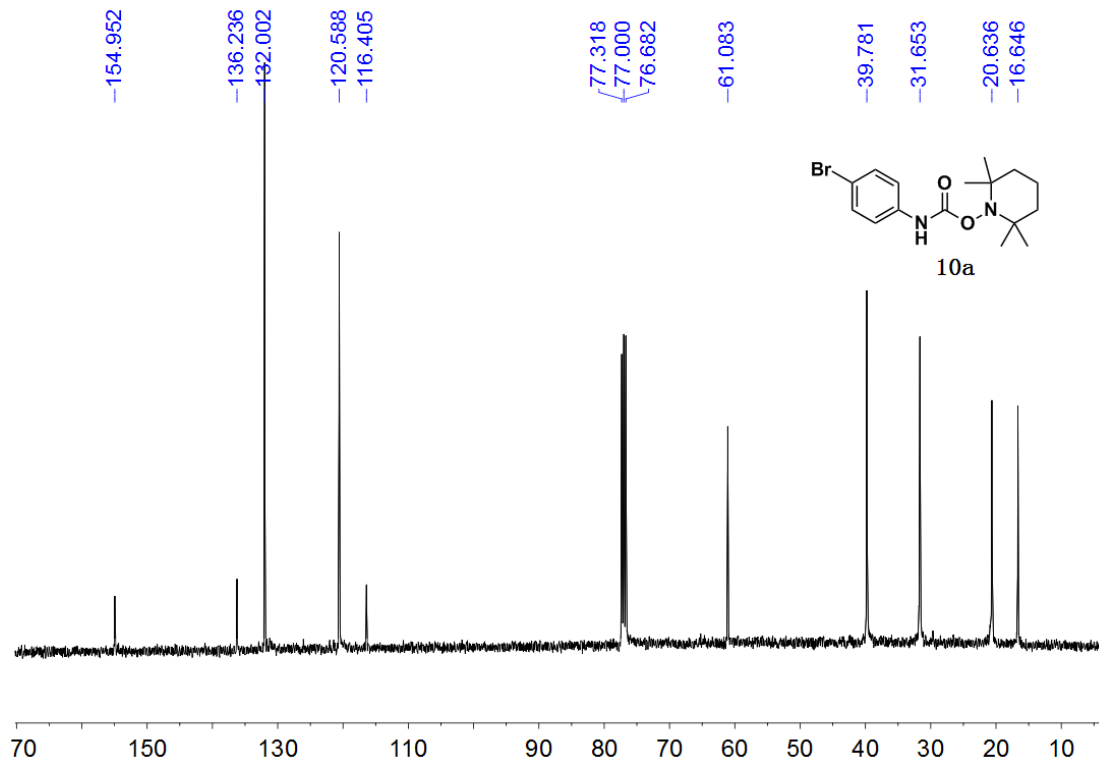

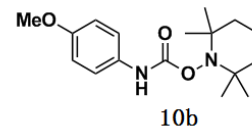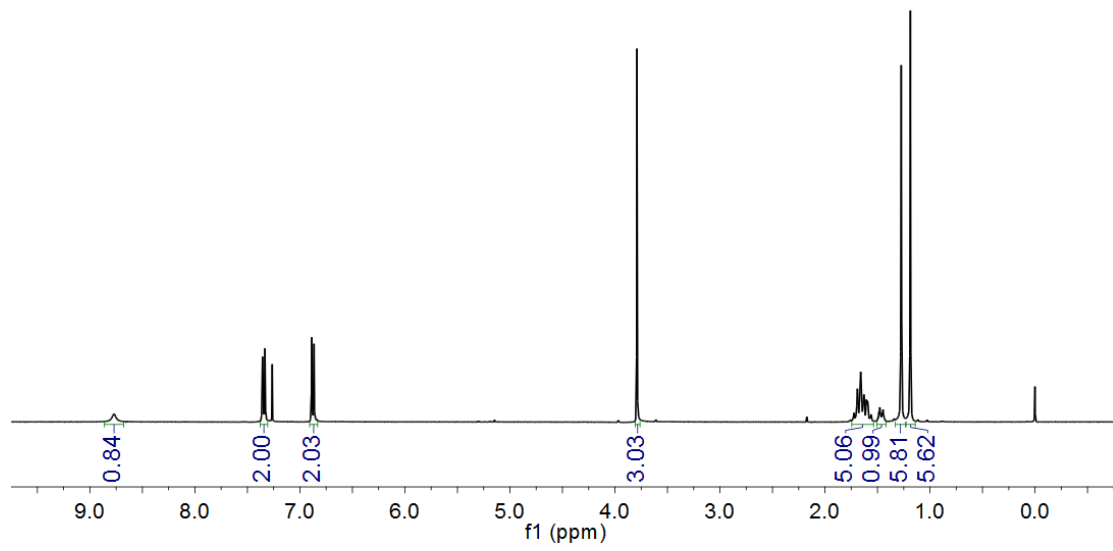

$^{13}\text{C NMR}$  chemical shifts (ppm): 156.28, 155.61, 130.21, 121.17, 114.27, 77.32, 77.00, 76.68, 60.94, 55.49, 39.79, 31.69, 31.65, 20.65, 20.60, 16.69.

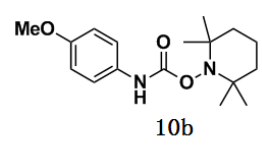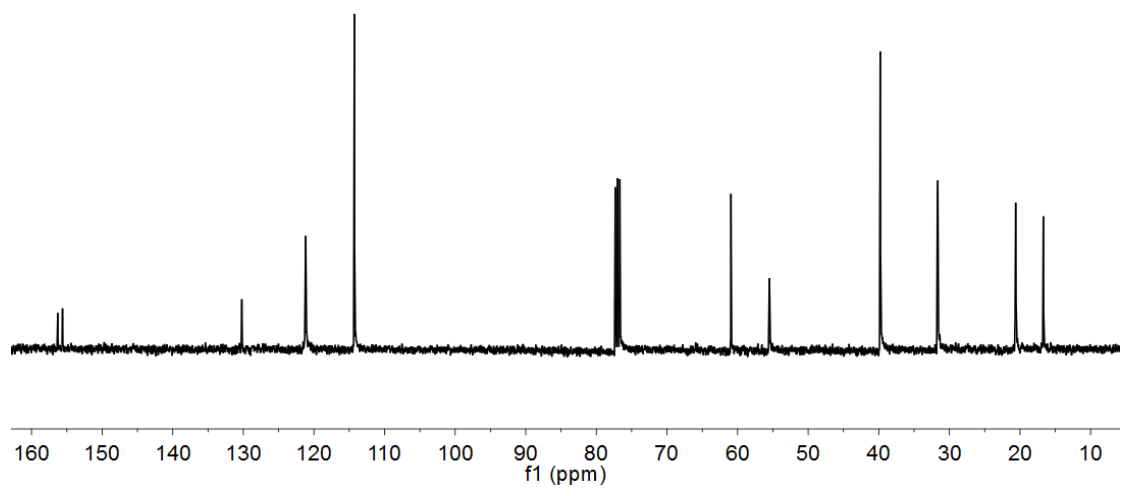

Supplement: c7ob00019g1.pdf [file c7ob00019g1.pdf]
